# Supplementary material for: A search for blues brothers: X-ray crystallographic/spectroscopic characterization of the tetraarylbenzidine cation radical as a product of aging of solid magic blue
Source: Royal Society of Chemistry journal article supplement (doi:10.1039/c6ob00140h), 2016-01-01
Supplement: c6ob00140h1.pdf [file c6ob00140h1.pdf]

# Electronic Supplementary Materials

---

## **Search for Blues Brothers: X-ray Crystallographic/Spectroscopic Characterization of Tetraarylbenzidine Cation Radical as a Product of Aging of Solid Magic Blue**

*Marat R. Talipov, Mohammad M. Hossain, Anitha Boddeda, Khushabu Thakur,  
and Rajendra Rathore\**

Department of Chemistry  
Marquette University  
P.O. Box 1881, Milwaukee, WI 53201-1881

### **Corresponding Author**

\*E-mail: [rajendra.rathore@marquette.edu](mailto:rajendra.rathore@marquette.edu)

## Contents

|                                                                                                                                                                                                              |    |
|--------------------------------------------------------------------------------------------------------------------------------------------------------------------------------------------------------------|----|
| S1. NMR Spectroscopy of aged MB <sup>0</sup>                                                                                                                                                                 | 3  |
| S2. MALDI Spectroscopy of aged sample of MB <sup>0</sup>                                                                                                                                                     | 4  |
| S3. Cyclic Voltammetry of TAB and 4-9                                                                                                                                                                        | 5  |
| S4. Redox Titrations of TAB and 6-9                                                                                                                                                                          | 6  |
| S5. Crystal data and structure refinement                                                                                                                                                                    | 8  |
| S6. Computational Details                                                                                                                                                                                    | 11 |
| S7. General Experimental Methods and Materials.                                                                                                                                                              | 14 |
| S8. Synthesis of compounds in Chart 1.                                                                                                                                                                       | 15 |
| S8.1. Synthesis of 3, 6-dibromo-9-(4'-bromophenyl)-9H-carbazole (S1-2 or 4).                                                                                                                                 | 15 |
| S8.2. Synthesis of 4,4'-bis(3,6-dibromo-9H-carbazol-9-yl)-1,1'-biphenyl (S2-2 or 5)                                                                                                                          | 15 |
| S8.3. Synthesis of <i>tetrakis</i> -(4-bromophenyl)benzidine (S3-2 or TAB).                                                                                                                                  | 16 |
| S8.4. Synthesis of 2-bromo- <i>N</i> <sup>4</sup> , <i>N</i> <sup>4</sup> , <i>N</i> <sup>4'</sup> , <i>N</i> <sup>4'</sup> - <i>tetrakis</i> (4-bromophenyl)-[1,1'-biphenyl]-4,4'-diamine (S4-4 or 6)       | 17 |
| S8.5. Synthesis of 3-bromo- <i>N</i> <sup>4</sup> , <i>N</i> <sup>4</sup> , <i>N</i> <sup>4'</sup> , <i>N</i> <sup>4'</sup> - <i>tetrakis</i> (4-bromophenyl)-[1,1'-biphenyl]-4,4'-diamine (S5-5 or 7).      | 18 |
| S8.6. Synthesis of 3,3'-dibromo- <i>N</i> <sup>4</sup> , <i>N</i> <sup>4</sup> , <i>N</i> <sup>4'</sup> , <i>N</i> <sup>4'</sup> - <i>tetrakis</i> (4-bromophenyl)-[1,1'-biphenyl]-4,4'-diamine (S6-3 or 8). | 20 |
| S8.7. Synthesis of 2,2'-dibromo- <i>N</i> <sup>4</sup> , <i>N</i> <sup>4</sup> , <i>N</i> <sup>4'</sup> , <i>N</i> <sup>4'</sup> - <i>tetrakis</i> (4-bromophenyl)-[1,1'-biphenyl]-4,4'-diamine (S7-2 or 9). | 21 |
| S8.8. Synthesis of <i>tris</i> (2-bromo-4-( <i>tert</i> -butyl)phenyl)amine (S8-2 or BC)                                                                                                                     | 22 |
| S8.9. General procedures for preparative isolation cation-radical hexachloroantimonate salts.                                                                                                                | 23 |
| S8.10. Preparation of the TAB <sup>++</sup> SbCl <sub>6</sub> <sup>-</sup> salt.                                                                                                                             | 23 |
| S9. NMR Spectroscopy                                                                                                                                                                                         | 24 |
| S10. References                                                                                                                                                                                              | 38 |
| S11. Archive entries from the calculation files                                                                                                                                                              | 39 |

## S1. NMR Spectroscopy of aged $\text{MB}^0$

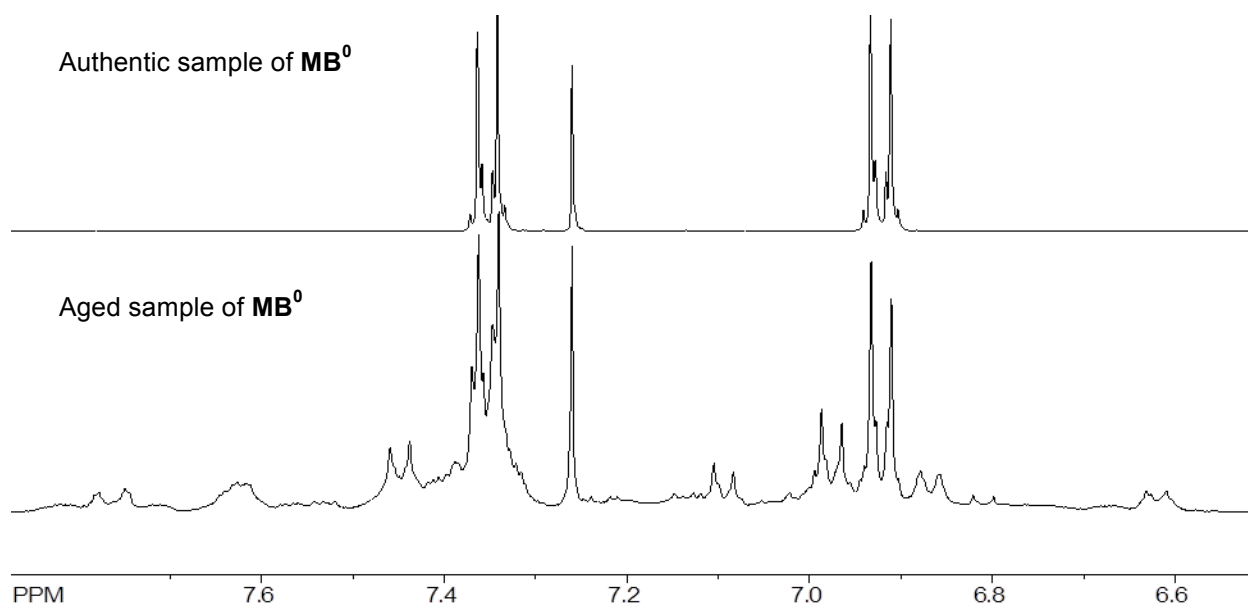

**Fig. S1:** Comparison of the  $^1\text{H}$  NMR spectra of aged sample of  $\text{MB}^{++}$  reduced by Zn dust or ferrocene (bottom) and the authentic sample of neutral  $\text{MB}^0$  (top).

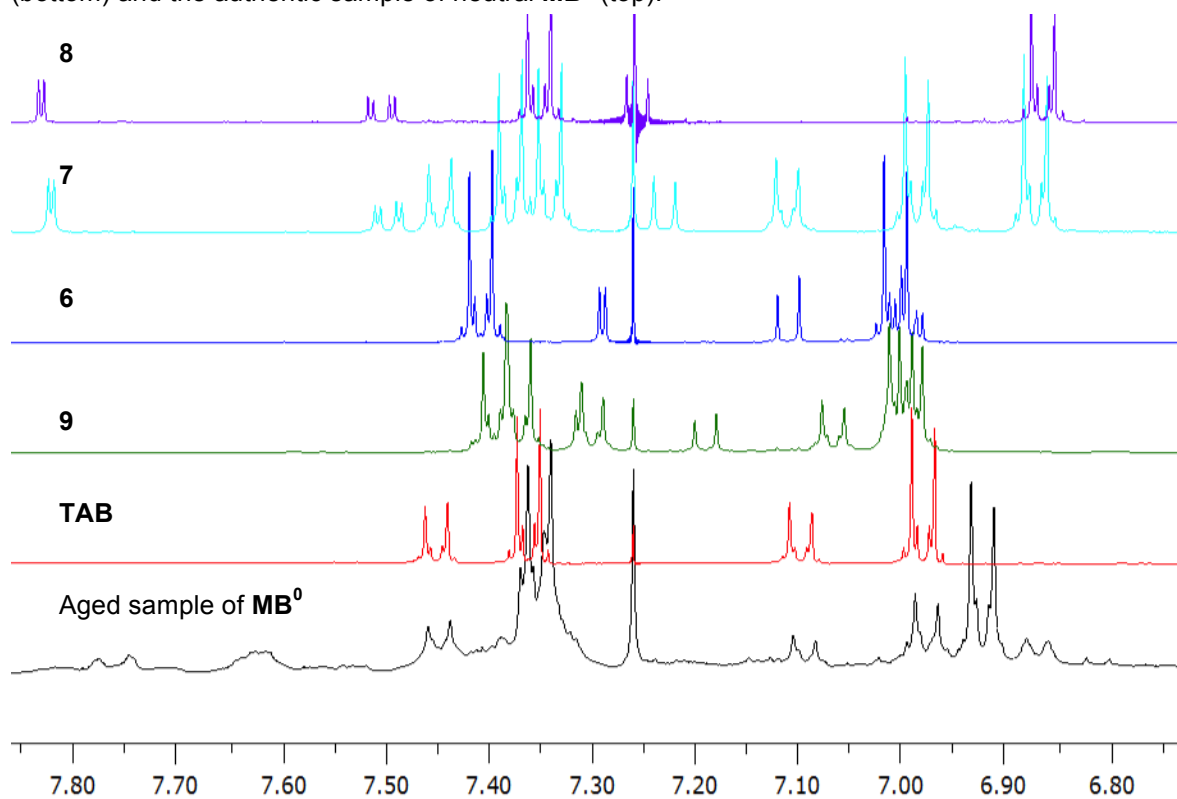

**Fig. S2.** Comparison of the  $^1\text{H}$  NMR spectra of the aged sample of  $\text{MB}^{++}$ , reduced to  $\text{MB}^0$  by using ferrocene (identical to that in Fig. S1 in the ESI), and NMR spectra of authentic **TAB** and **6-9**.

## S2. MALDI Spectroscopy of aged sample of $\text{MB}^0$

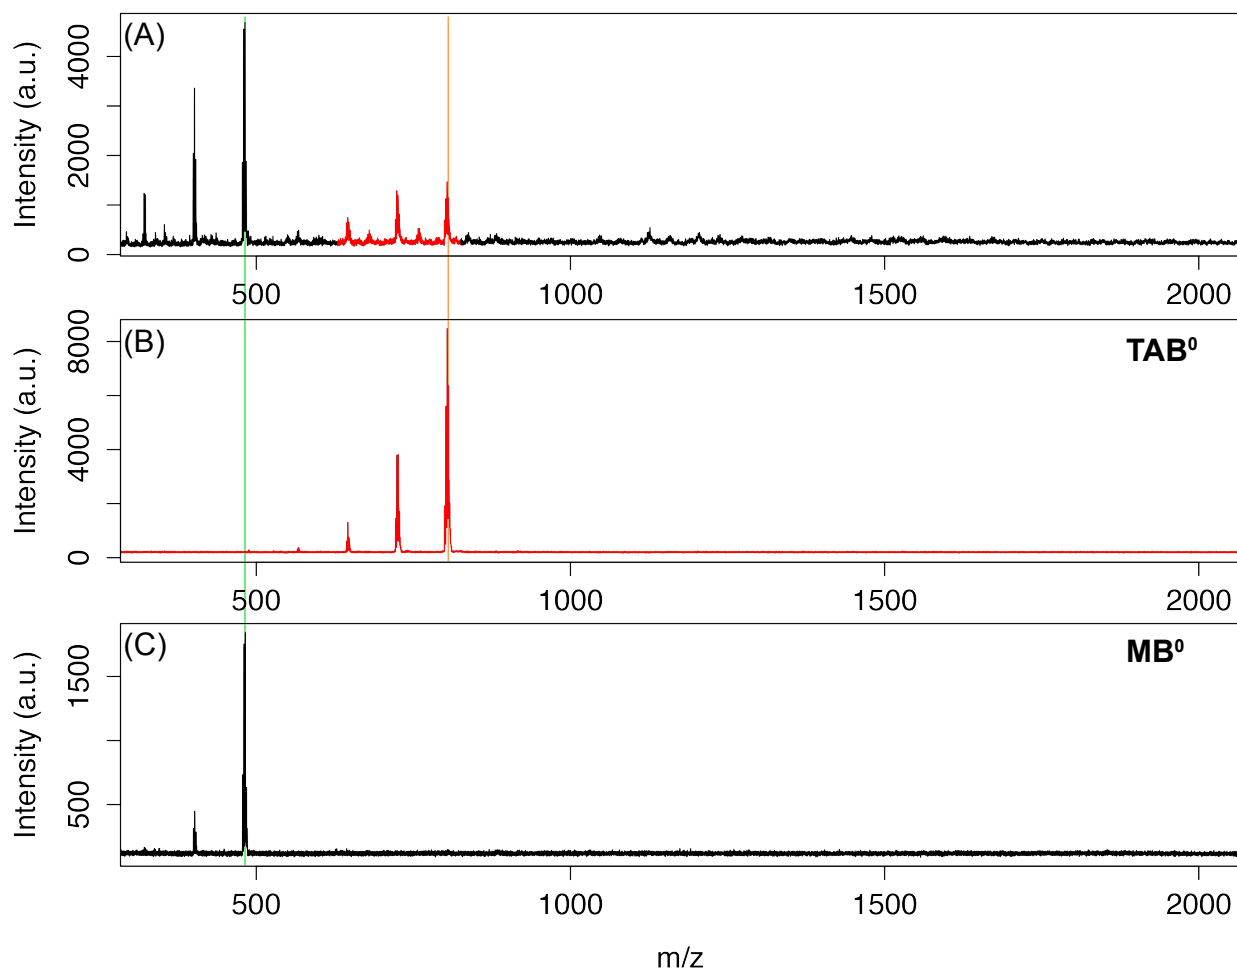

**Fig. S3.** MALDI-TOF mass spectra of the aged sample of  $\text{MB}^{+}$ , reduced to  $\text{MB}^0$  using ferrocene in dichloromethane [The NMR spectrum of the same sample is shown above in Fig. S1 of the ESI] (A), and authentic samples of  $\text{TAB}^0$  (B) and  $\text{MB}^0$  (C).

### S3. Cyclic Voltammetry of TAB and 4-9

The CV cell was of an air-tight design with high vacuum Teflon valves and Viton O-ring seals to allow an inert atmosphere to be maintained without contamination by grease. The working electrode consisted of an adjustable platinum disk embedded in a glass seal to allow periodic polishing (with a fine emery cloth) without changing the surface area ( $\sim 1 \text{ mm}^2$ ) significantly. The reference SCE electrode (saturated calomel electrode) and its salt bridge were separated from the catholyte by a sintered glass frit. The counter electrode consisted of a platinum gauze that was separated from the working electrode by  $\sim 3 \text{ mm}$ . The CV measurements were carried out in a solution of 0.1 M supporting electrolyte (tetra-*n*-butylammonium hexafluorophosphate) and the substrate in dry  $\text{CH}_2\text{Cl}_2$  under an argon atmosphere at  $22 \text{ }^\circ\text{C}$ . All the cyclic voltammograms were recorded at a sweep rate of  $50 \text{ mV sec}^{-1}$  and were IR compensated (Fig. S4). The oxidation potentials ( $E_{\text{ox}}$ , calculated by taking the average of anodic and cathodic peaks) were referenced to the added (equimolar) ferrocene.

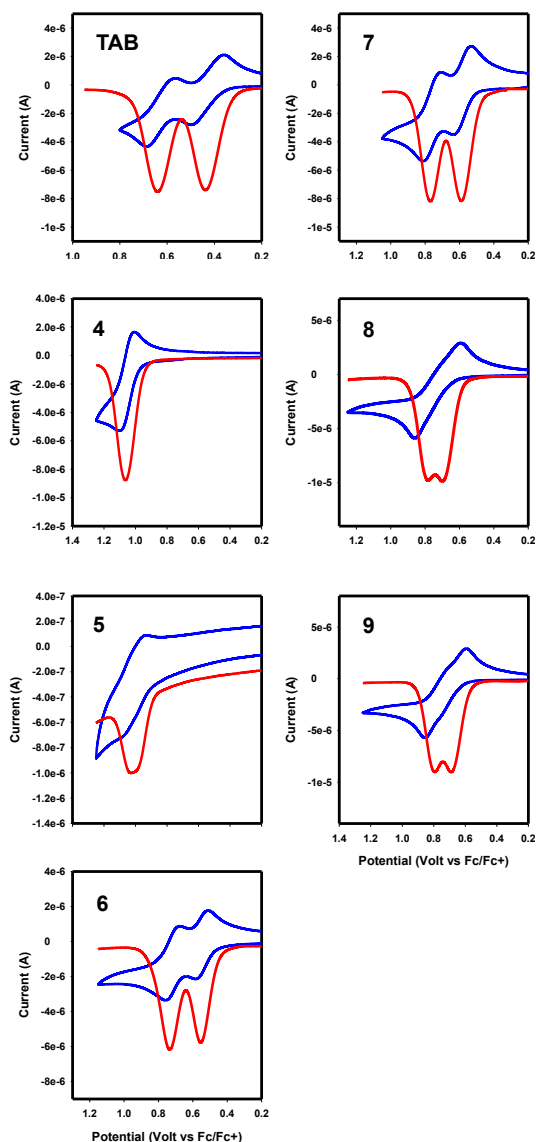

**Fig. S4.** Cyclic and square-wave voltammograms of **TAB** and **4-9** (Chart 1 of the Manuscript). Poor CV quality of **5** was due to its poor solubility in  $\text{CH}_2\text{Cl}_2$ .

## S4. Redox Titrations of TAB and 6-9

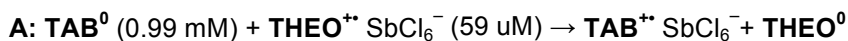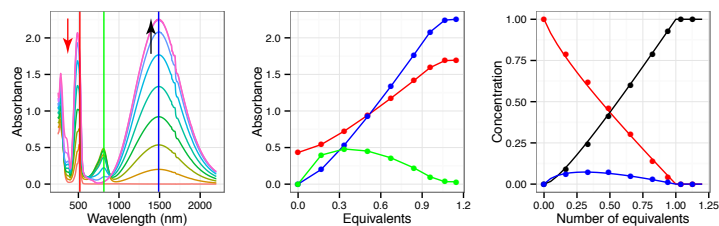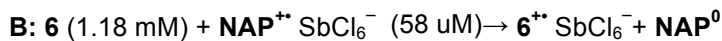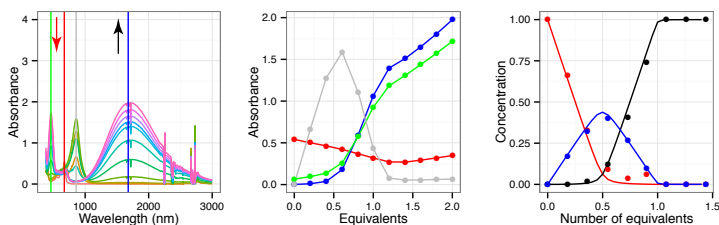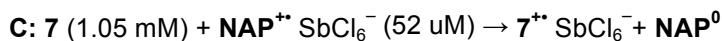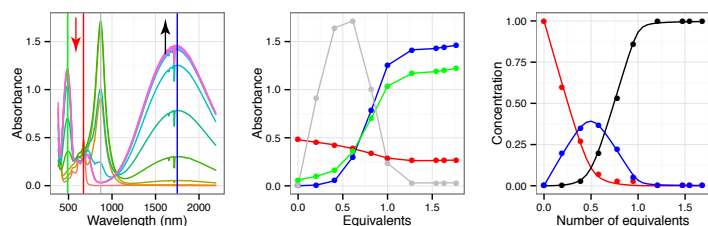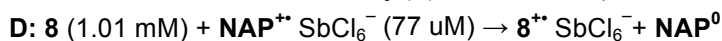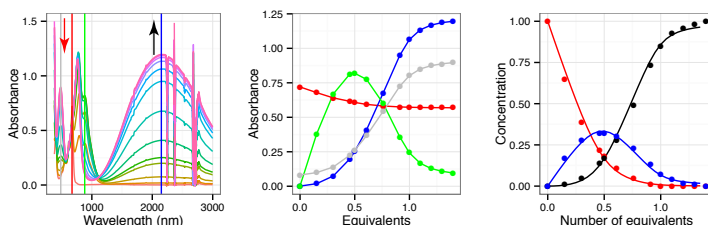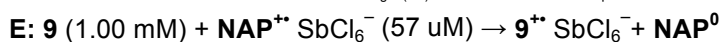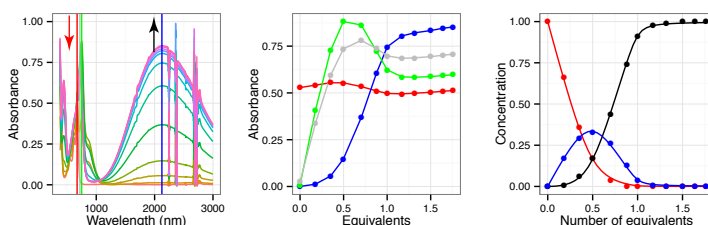

**Fig. S5.** Spectral changes attendant upon the reduction of **TAB** and **6-9** (A-E, as denoted) by  $\text{THEO}^{++} \text{SbCl}_6^-$  and  $\text{NAP}^{++} \text{SbCl}_6^-$  in  $\text{CH}_2\text{Cl}_2$  at 22 °C as well as the corresponding molar fraction plots against the number of added equivalents of neutral electron donor (i.e. **TAB** and **6-9**). See also Table S4.

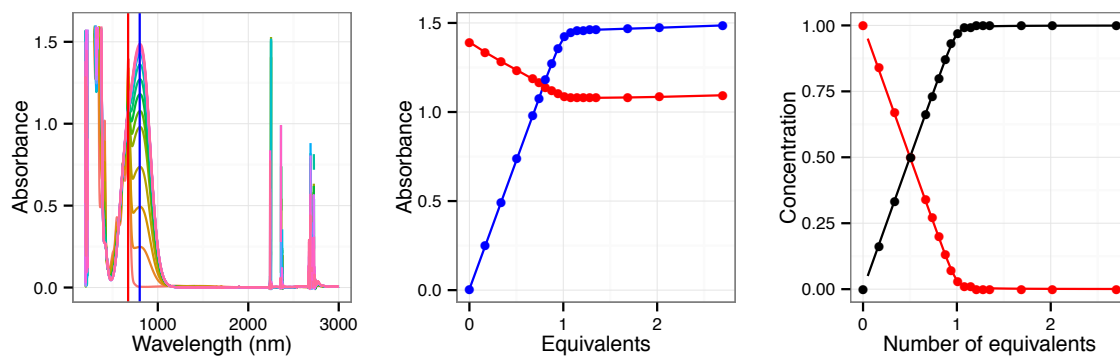

**Fig. S6.** Spectral changes attendant upon the reduction of 3.03 mM **BC** by 0.15 mM **NAP<sup>+</sup>** SbCl<sub>6</sub><sup>-</sup> in CH<sub>2</sub>Cl<sub>2</sub> at 22 °C as well as the corresponding molar fraction plot against the number of added equivalents of neutral **BC**.

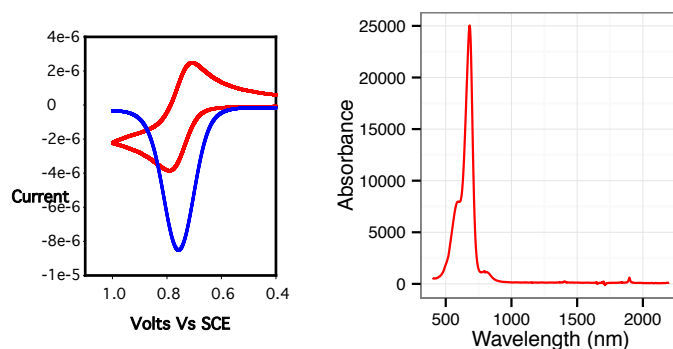

**Fig. S7.** (Left) Cyclic and square-wave voltammograms of 5 mM **10** in CH<sub>2</sub>Cl<sub>2</sub> (22 °C) containing 0.2 M tetra-*n*-butylammonium hexafluorophosphate at  $\nu = 200 \text{ mV s}^{-1}$ . (Right) The molar absorptivity spectrum of **10** cation radical in CH<sub>2</sub>Cl<sub>2</sub> (22 °C).

## S5. Crystal data and structure refinement

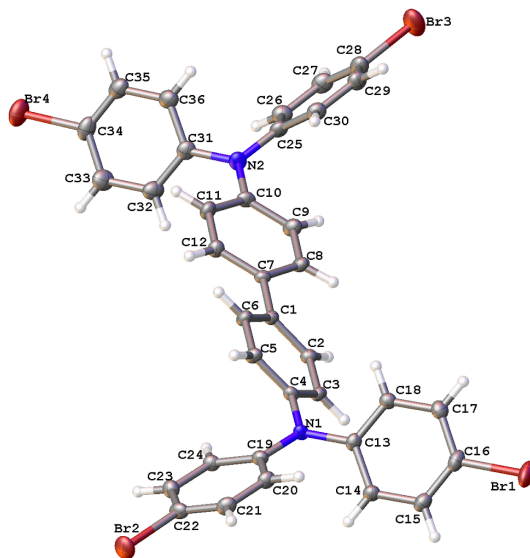

Fig. S8. ORTEP diagram of **TAB**.

Table S1. Crystal data and structure refinement for **TAB**

|                                             |                                                                |
|---------------------------------------------|----------------------------------------------------------------|
| Identification code                         | raj25b                                                         |
| Empirical formula                           | C <sub>36</sub> H <sub>24</sub> Br <sub>4</sub> N <sub>2</sub> |
| Formula weight                              | 803.95                                                         |
| Temperature/K                               | 100.00(10)                                                     |
| Crystal system                              | triclinic                                                      |
| Space group                                 | P-1                                                            |
| a/Å                                         | 15.3203(2)                                                     |
| b/Å                                         | 15.5925(2)                                                     |
| c/Å                                         | 19.8315(3)                                                     |
| $\alpha$ /°                                 | 87.2838(12)                                                    |
| $\beta$ /°                                  | 81.2554(13)                                                    |
| $\gamma$ /°                                 | 82.7604(12)                                                    |
| Volume/Å <sup>3</sup>                       | 4643.06(12)                                                    |
| Z                                           | 6                                                              |
| $\rho_{\text{calc}}$ /g/cm <sup>3</sup>     | 1.725                                                          |
| $\mu$ /mm <sup>-1</sup>                     | 6.559                                                          |
| F(000)                                      | 2363.0                                                         |
| Crystal size/mm <sup>3</sup>                | 0.4519 × 0.2202 × 0.0592                                       |
| Radiation                                   | CuK $\alpha$ ( $\lambda$ = 1.54184)                            |
| 2 $\theta$ range for data collection/°      | 5.72 to 148.1                                                  |
| Index ranges                                | -19 ≤ h ≤ 19, -19 ≤ k ≤ 19, -24 ≤ l ≤ 21                       |
| Reflections collected                       | 88456                                                          |
| Independent reflections                     | 18598 [R <sub>int</sub> = 0.0359, R <sub>sigma</sub> = 0.0223] |
| Data/restraints/parameters                  | 18598/0/1135                                                   |
| Goodness-of-fit on F <sup>2</sup>           | 1.014                                                          |
| Final R indexes [I ≥ 2 $\sigma$ (I)]        | R <sub>1</sub> = 0.0369, wR <sub>2</sub> = 0.0957              |
| Final R indexes [all data]                  | R <sub>1</sub> = 0.0425, wR <sub>2</sub> = 0.1009              |
| Largest diff. peak/hole / e Å <sup>-3</sup> | 2.42/-1.52                                                     |



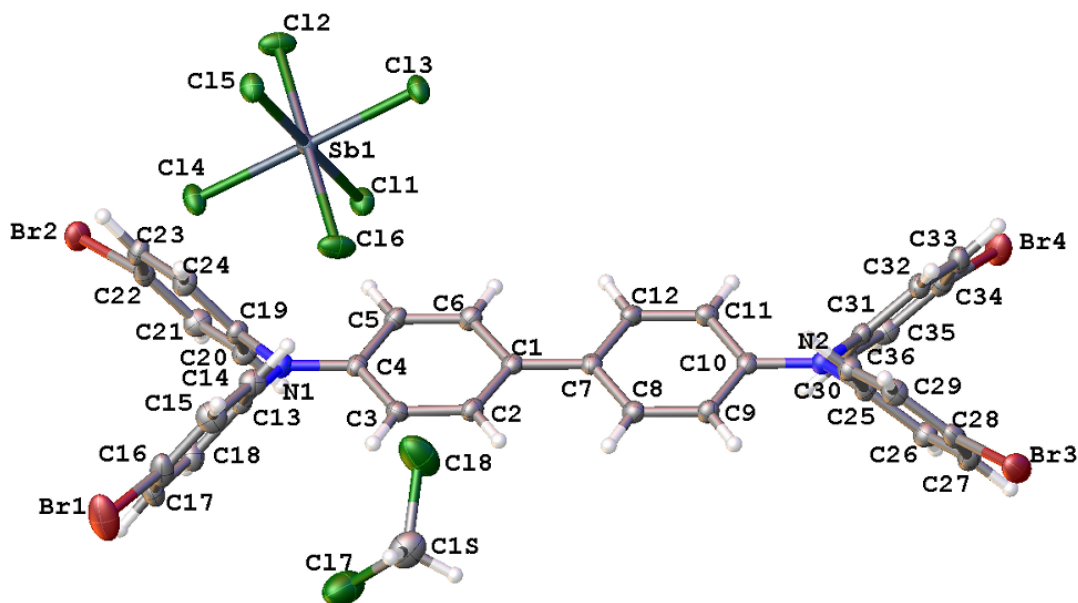

Fig. S9. ORTEP diagram of **TAB<sup>+</sup>**.

Table S2. Crystal data and structure refinement for **TAB<sup>+</sup>**

|                                             |                                                                                   |
|---------------------------------------------|-----------------------------------------------------------------------------------|
| Identification code                         | raj25f                                                                            |
| Empirical formula                           | C <sub>37</sub> H <sub>26</sub> N <sub>2</sub> C <sub>18</sub> Br <sub>4</sub> Sb |
| Formula weight                              | 1223.59                                                                           |
| Temperature/K                               | 100.00(10)                                                                        |
| Crystal system                              | monoclinic                                                                        |
| Space group                                 | P21/n                                                                             |
| a/Å                                         | 15.37545(18)                                                                      |
| b/Å                                         | 14.15367(14)                                                                      |
| c/Å                                         | 19.4760(2)                                                                        |
| $\alpha$ /°                                 | 90.00                                                                             |
| $\beta$ /°                                  | 91.4952(10)                                                                       |
| $\gamma$ /°                                 | 90.00                                                                             |
| Volume/Å <sup>3</sup>                       | 4236.90(8)                                                                        |
| Z                                           | 4                                                                                 |
| $\rho$ calc/cm <sup>3</sup>                 | 1.918                                                                             |
| $\mu$ /mm <sup>-1</sup>                     | 14.474                                                                            |
| F(000)                                      | 2356.0                                                                            |
| Crystal size/mm <sup>3</sup>                | 0.2391 × 0.105 × 0.0323                                                           |
| Radiation                                   | CuK $\alpha$ ( $\lambda$ = 1.54184)                                               |
| 2 $\theta$ range for data collection/°      | 7.24 to 148.2                                                                     |
| Index ranges                                | -18 ≤ h ≤ 19, -17 ≤ k ≤ 17, -19 ≤ l ≤ 23                                          |
| Reflections collected                       | 41012                                                                             |
| Independent reflections                     | 8456 [Rint = 0.0366, Rsigma = 0.0238]                                             |
| Data/restraints/parameters                  | 8456/0/469                                                                        |
| Goodness-of-fit on F <sup>2</sup>           | 1.023                                                                             |
| Final R indexes [I ≥ 2 $\sigma$ (I)]        | R1 = 0.0266, wR2 = 0.0628                                                         |
| Final R indexes [all data]                  | R1 = 0.0310, wR2 = 0.0659                                                         |
| Largest diff. peak/hole / e Å <sup>-3</sup> | 1.36/-1.10                                                                        |

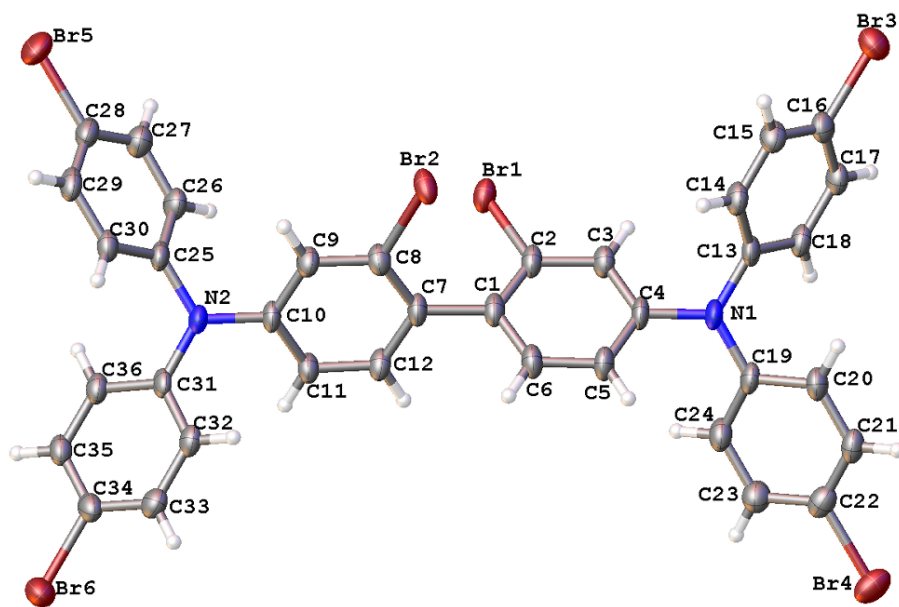

Fig. S10. ORTEP diagram of **9**.

Table S3. Crystal data and structure refinement for **9**

|                                             |                                                                |
|---------------------------------------------|----------------------------------------------------------------|
| Identification code                         | raj25j                                                         |
| Empirical formula                           | C <sub>36</sub> H <sub>22</sub> N <sub>2</sub> Br <sub>6</sub> |
| Formula weight                              | 962.02                                                         |
| Temperature/K                               | 100.00(10)                                                     |
| Crystal system                              | triclinic                                                      |
| Space group                                 | P-1                                                            |
| a/Å                                         | 10.1188(2)                                                     |
| b/Å                                         | 13.8839(3)                                                     |
| c/Å                                         | 16.4081(5)                                                     |
| $\alpha$ /°                                 | 107.983(2)                                                     |
| $\beta$ /°                                  | 106.750(2)                                                     |
| $\gamma$ /°                                 | 96.924(2)                                                      |
| Volume/Å <sup>3</sup>                       | 2043.19(9)                                                     |
| Z                                           | 2                                                              |
| $\rho$ calc/cm <sup>3</sup>                 | 1.564                                                          |
| $\mu$ /mm <sup>-1</sup>                     | 7.282                                                          |
| F(000)                                      | 924.0                                                          |
| Crystal size/mm <sup>3</sup>                | 0.3829 × 0.1448 × 0.0709                                       |
| Radiation                                   | CuK $\alpha$ ( $\lambda$ = 1.54184)                            |
| 2 $\Theta$ range for data collection/°      | 6.04 to 147.4                                                  |
| Index ranges                                | -12 ≤ h ≤ 12, -14 ≤ k ≤ 17, -20 ≤ l ≤ 20                       |
| Reflections collected                       | 38897                                                          |
| Independent reflections                     | 8166 [Rint = 0.0378, Rsigma = 0.0219]                          |
| Data/restraints/parameters                  | 8166/0/397                                                     |
| Goodness-of-fit on F <sup>2</sup>           | 1.052                                                          |
| Final R indexes [I ≥ 2 $\sigma$ (I)]        | R1 = 0.0334, wR2 = 0.0931                                      |
| Final R indexes [all data]                  | R1 = 0.0371, wR2 = 0.0955                                      |
| Largest diff. peak/hole / e Å <sup>-3</sup> | 1.42/-1.10                                                     |

## S6. Computational Details

Electronic structure calculations were performed with the Gaussian 09 package, revision D01.<sup>1</sup> For the density functional theory (DFT) calculations we used calibrated (see Ref.<sup>2</sup> for details) B1LYP functional<sup>3</sup> that contains 40% contribution (denoted as B1LYP-40) of the exact exchange with 6-31G(d) basis set by Pople and co-workers<sup>4</sup> (see refs<sup>5,6</sup> and references therein for the detailed discussion concerning self-interaction error). Solvent effects were included using the implicit integral equation formalism polarizable continuum model (IEF-PCM, also referred as PCM)<sup>7-11</sup> with the dichloromethane solvent parameters ( $\epsilon = 8.93$ ). In all DFT calculations, ultrafine Lebedev's grid was used with 99 radial shells per atom and 590 angular points in each shell. The wave function stability tests<sup>12,13</sup> was performed to ensure absence of solutions with lower energy. The values of  $\langle S^2 \rangle$  operator after spin annihilation were confirmed to be close to the expectation value of 0.75, thus indicating that spin contamination was not an issue for the performed calculations. Energies of vertical electronic excitations were computed using the time-dependent density functional theory (TD-DFT) method.<sup>13-17</sup> Tight cutoffs on forces and atomic displacement were used to determine the convergence in geometry optimization procedure. Hessians were calculated for the optimized structures to confirm absence of imaginary frequencies.

**Table S4.** Wavelengths and oscillator strengths corresponding to the lowest-energy transition in the cation radicals of compounds in Chart 1 of the Manuscript, obtained from the TD-DFT calculations [B1LYP-40/6-31G(d)+PCM(CH<sub>2</sub>Cl<sub>2</sub>)] ( $\lambda_{D0 \rightarrow D1}$  and  $f_{osc}$ ) as well as the lowest-energy transition of cation radicals ( $\lambda_{max}(CR)$  and  $\epsilon_{max}(CR)$ ) and dications ( $\lambda_{max}(DC)$  and  $\epsilon_{max}(DC)$ ) of these compounds obtained by spectroscopic redox titration

| Compound   | $\lambda_{D0 \rightarrow D1}$ , nm | $f_{osc}$ | $\lambda_{max}(CR)$ , nm | $\epsilon_{max}(CR)$ , M <sup>-1</sup> cm <sup>-1</sup> | $\lambda_{max}(DC)$ , nm | $\epsilon_{max}(DC)$ , M <sup>-1</sup> cm <sup>-1</sup> |
|------------|------------------------------------|-----------|--------------------------|---------------------------------------------------------|--------------------------|---------------------------------------------------------|
| <b>MB</b>  | 604                                | 0.30      | 728                      | 28200                                                   | -                        | -                                                       |
| <b>1</b>   | 686                                | 0.35      | 757 <sup>18</sup>        | -                                                       | -                        | -                                                       |
| <b>2</b>   | 721                                | 0.24      | 805 <sup>18</sup>        | -                                                       | -                        | -                                                       |
| <b>3</b>   | 823                                | 0.14      | 880 <sup>18</sup>        | -                                                       | -                        | -                                                       |
| <b>4</b>   | 1291                               | 0.03      | 820 <sup>18</sup>        | -                                                       | -                        | -                                                       |
| <b>5</b>   | 1526                               | 0.27      | 854, 2500                | -                                                       | -                        | -                                                       |
| <b>TAB</b> | 1353                               | 1.00      | 1490                     | 38100                                                   | 807                      | 112600                                                  |
| <b>6</b>   | 1420                               | 0.73      | 1735                     | 24000                                                   | 860                      | 66500                                                   |
| <b>7</b>   | 1304                               | 0.56      | 1750                     | 24500                                                   | 869                      | 87700                                                   |
| <b>8</b>   | 1339                               | 0.21      | 2150                     | 15000                                                   | 883                      | 25590                                                   |
| <b>9</b>   | 1428                               | 0.30      | 2128                     | 15000                                                   | 752                      | 41750                                                   |

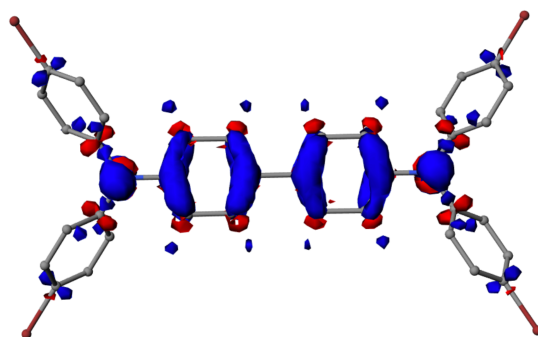

**Fig. S11.** Difference between the spatial electron density distributions in the **TAB** and **TAB<sup>+</sup>**, with the geometries corresponding to **TAB<sup>+</sup>** [B1LYP-40/6-31G(d)+PCM(CH<sub>2</sub>Cl<sub>2</sub>)].

**Table S5.** Comparison of the bond lengths (in Å) of **TAB<sup>0</sup>** (N) and **TAB<sup>\*\*</sup>** (CR), obtained by X-ray crystallography and by DFT calculations

| Atom1      | Atom2      | X-ray |       |          | DFT   |       |          |
|------------|------------|-------|-------|----------|-------|-------|----------|
|            |            | N     | CR    | $\Delta$ | N     | CR    | $\Delta$ |
| <b>C1</b>  | <b>C2</b>  | 1.391 | 1.410 | 0.019    | 1.399 | 1.417 | 0.018    |
| <b>C2</b>  | <b>C3</b>  | 1.385 | 1.374 | -0.011   | 1.385 | 1.369 | -0.016   |
| <b>C1</b>  | <b>C6</b>  | 1.394 | 1.424 | 0.030    | 1.399 | 1.417 | 0.018    |
| <b>C3</b>  | <b>C4</b>  | 1.385 | 1.416 | 0.031    | 1.396 | 1.415 | 0.019    |
| <b>C4</b>  | <b>C5</b>  | 1.384 | 1.418 | 0.034    | 1.396 | 1.415 | 0.019    |
| <b>C5</b>  | <b>C6</b>  | 1.392 | 1.365 | -0.027   | 1.385 | 1.369 | -0.016   |
| <b>N1</b>  | <b>C4</b>  | 1.428 | 1.367 | -0.061   | 1.417 | 1.374 | -0.043   |
| <b>N1</b>  | <b>C13</b> | 1.416 | 1.442 | 0.026    | 1.413 | 1.427 | 0.014    |
| <b>N1</b>  | <b>C19</b> | 1.408 | 1.443 | 0.035    | 1.413 | 1.427 | 0.014    |
| <b>C13</b> | <b>C14</b> | 1.402 | 1.392 | -0.010   | 1.397 | 1.394 | -0.003   |
| <b>C13</b> | <b>C18</b> | 1.392 | 1.382 | -0.010   | 1.397 | 1.394 | -0.003   |
| <b>C14</b> | <b>C15</b> | 1.386 | 1.389 | 0.003    | 1.387 | 1.386 | -0.001   |
| <b>C15</b> | <b>C16</b> | 1.377 | 1.376 | -0.001   | 1.387 | 1.388 | 0.001    |
| <b>C16</b> | <b>C17</b> | 1.391 | 1.378 | -0.013   | 1.387 | 1.388 | 0.001    |
| <b>C17</b> | <b>C18</b> | 1.386 | 1.387 | 0.001    | 1.387 | 1.386 | -0.001   |
| <b>Br1</b> | <b>C16</b> | 1.903 | 1.907 | 0.004    | 1.906 | 1.899 | -0.007   |
| <b>C19</b> | <b>C20</b> | 1.402 | 1.390 | -0.012   | 1.397 | 1.394 | -0.003   |
| <b>C19</b> | <b>C24</b> | 1.394 | 1.384 | -0.010   | 1.397 | 1.394 | -0.003   |
| <b>C20</b> | <b>C21</b> | 1.383 | 1.387 | 0.004    | 1.387 | 1.386 | -0.001   |
| <b>C21</b> | <b>C22</b> | 1.383 | 1.385 | 0.002    | 1.387 | 1.388 | 0.001    |
| <b>C22</b> | <b>C23</b> | 1.385 | 1.387 | 0.002    | 1.387 | 1.388 | 0.001    |
| <b>C23</b> | <b>C24</b> | 1.390 | 1.386 | -0.004   | 1.387 | 1.386 | -0.001   |
| <b>Br2</b> | <b>C22</b> | 1.904 | 1.894 | -0.010   | 1.906 | 1.899 | -0.007   |
| <b>C1</b>  | <b>C7</b>  | 1.484 | 1.448 | -0.036   | 1.479 | 1.441 | -0.038   |
| <b>C7</b>  | <b>C12</b> | 1.396 | 1.421 | 0.025    | 1.399 | 1.417 | 0.018    |
| <b>C7</b>  | <b>C8</b>  | 1.397 | 1.422 | 0.025    | 1.399 | 1.417 | 0.018    |
| <b>C8</b>  | <b>C9</b>  | 1.389 | 1.365 | -0.024   | 1.385 | 1.369 | -0.016   |
| <b>C9</b>  | <b>C10</b> | 1.390 | 1.412 | 0.022    | 1.396 | 1.415 | 0.019    |
| <b>C10</b> | <b>C11</b> | 1.393 | 1.417 | 0.024    | 1.396 | 1.415 | 0.019    |
| <b>C11</b> | <b>C12</b> | 1.389 | 1.370 | -0.019   | 1.385 | 1.369 | -0.016   |
| <b>N2</b>  | <b>C10</b> | 1.423 | 1.372 | -0.051   | 1.417 | 1.374 | -0.043   |
| <b>N2</b>  | <b>C25</b> | 1.418 | 1.434 | 0.016    | 1.413 | 1.427 | 0.014    |
| <b>N2</b>  | <b>C31</b> | 1.414 | 1.434 | 0.020    | 1.413 | 1.427 | 0.014    |
| <b>C25</b> | <b>C26</b> | 1.400 | 1.391 | -0.009   | 1.397 | 1.394 | -0.003   |
| <b>C25</b> | <b>C30</b> | 1.391 | 1.392 | 0.001    | 1.397 | 1.394 | -0.003   |
| <b>C26</b> | <b>C27</b> | 1.385 | 1.383 | -0.002   | 1.387 | 1.386 | -0.001   |

| Atom1      | Atom2      | X-ray |       |          | DFT   |       |          |
|------------|------------|-------|-------|----------|-------|-------|----------|
|            |            | N     | CR    | $\Delta$ | N     | CR    | $\Delta$ |
| <b>C27</b> | <b>C28</b> | 1.382 | 1.383 | 0.001    | 1.387 | 1.388 | 0.001    |
| <b>C28</b> | <b>C29</b> | 1.388 | 1.384 | -0.004   | 1.387 | 1.388 | 0.001    |
| <b>C29</b> | <b>C30</b> | 1.389 | 1.394 | 0.005    | 1.387 | 1.386 | -0.001   |
| <b>Br3</b> | <b>C28</b> | 1.904 | 1.900 | -0.004   | 1.906 | 1.899 | -0.007   |
| <b>C31</b> | <b>C32</b> | 1.396 | 1.392 | -0.004   | 1.397 | 1.394 | -0.003   |
| <b>C31</b> | <b>C36</b> | 1.397 | 1.393 | -0.004   | 1.397 | 1.394 | -0.003   |
| <b>C32</b> | <b>C33</b> | 1.387 | 1.386 | -0.001   | 1.387 | 1.386 | -0.001   |
| <b>C33</b> | <b>C34</b> | 1.390 | 1.384 | -0.006   | 1.387 | 1.388 | 0.001    |
| <b>C34</b> | <b>C35</b> | 1.378 | 1.376 | -0.002   | 1.387 | 1.388 | 0.001    |
| <b>C35</b> | <b>C36</b> | 1.386 | 1.384 | -0.002   | 1.387 | 1.386 | -0.001   |
| <b>Br4</b> | <b>C34</b> | 1.902 | 1.898 | -0.004   | 1.906 | 1.899 | -0.007   |

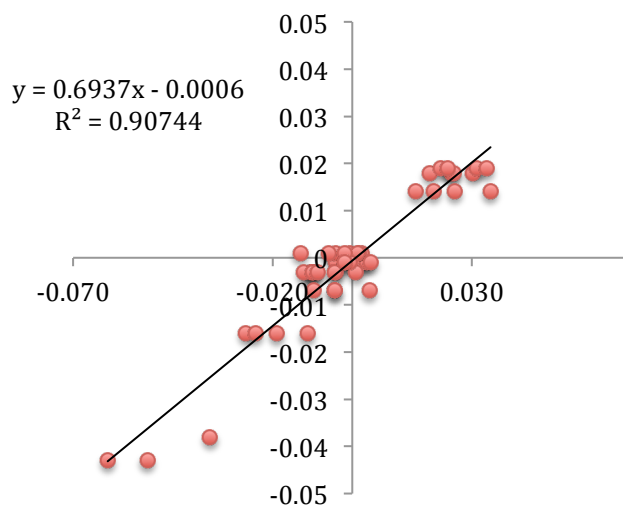

**Fig. S12.** Comparison of the oxidation-induced bond length changes (in Å) in **TAB** obtained by means of X-ray crystallography (abscissa) and DFT calculations (ordinate).

## S7. General Experimental Methods and Materials.

All reactions were performed under an argon atmosphere unless otherwise noted. All commercial reagents were used without further purification unless otherwise noted. Dichloromethane (Aldrich) was repeatedly stirred with fresh aliquots of concentrated sulfuric acid (~10 % by volume) until the acid layer remained colorless. After separation, CH<sub>2</sub>Cl<sub>2</sub> layer was washed successively with water, 5% aqueous sodium bicarbonate, water, and saturated aqueous sodium chloride and dried over anhydrous calcium chloride. The CH<sub>2</sub>Cl<sub>2</sub> was distilled twice from P<sub>2</sub>O<sub>5</sub> under an argon atmosphere and stored in a Schlenk flask equipped with a Teflon valve fitted with Viton O-rings. Acetonitrile was stirred with molecular sieves overnight, filtered, and again stirred with CaCl<sub>2</sub> overnight. After that it was filtered and distilled twice from P<sub>2</sub>O<sub>5</sub> under an argon atmosphere and stored in a Schlenk flask equipped with a Teflon valve fitted with Viton O-rings. The hexanes and toluene were distilled over P<sub>2</sub>O<sub>5</sub> under an argon atmosphere and then refluxed over calcium hydride (~12 h). After distillation from CaH<sub>2</sub>, the solvents were stored in Schlenk flasks under an argon atmosphere. Tetrahydrofuran (THF) was dried initially by distilling over lithium aluminum hydride under an argon atmosphere and stored in a Schlenk flask equipped with a Teflon valve fitted with Viton O-rings. NMR spectra were recorded on Varian 400 MHz NMR spectrometers.

## S8. Synthesis of compounds in Chart 1.

Synthetic schemes for the preparation of compounds in Chart 1 (in the manuscript) are presented below in individual schemes S1-S8 together with the detailed experimental procedures for the each step of synthesis and their characterization data (i.e. numerical spectroscopic data) as well as  $^1\text{H}/^{13}\text{C}$  NMR spectra are given below. Note that identity of each molecule was further confirmed by MALDI mass spectrometry.

### S8.1. Synthesis of 3,6-dibromo-9-(4'-bromophenyl)-9H-carbazole (S1-2 or 4).

#### Scheme S1.

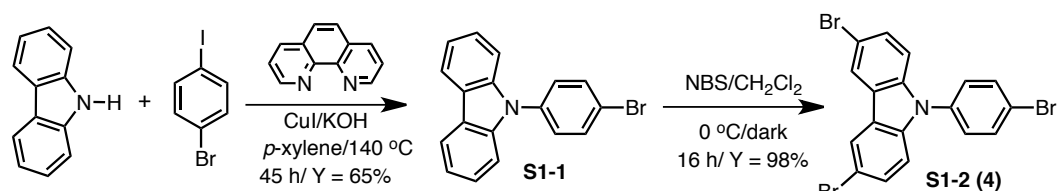

**Preparation of 9-(4-bromophenyl)-9H-carbazole (S1-1).**<sup>19</sup> A mixture of carbazole (1.0 g, 5.98 mmol), 4-bromoiodobenzene (1.86 g, 6.58 mmol), CuI (1.13 g, 5.98 mmol), 1,10-phenanthroline (1.05 g, 5.86 mmol) and KOH (1.50 g, 26.8 mmol) in *p*-xylene (50 mL) was stirred at ~140 °C for 45 hours. The reaction mixture was cooled to room temperature and the resulting suspension was filtered and residue was washed with *p*-xylene (3x 10mL). To the resulting filtrate CH<sub>2</sub>Cl<sub>2</sub> (160 mL) was added and it was washed with water and dried over anhydrous MgSO<sub>4</sub>. After removal of the solvent in vacuo, the crude product was purified on a silica gel chromatography with hexanes as eluent to afford compound **S1-1** as a solid. Yield: 1.26 g (65%). m.p. 146-147 °C (lit.<sup>19</sup> m.p. 149-150 °C).  $^1\text{H}$  NMR (400 MHz, CDCl<sub>3</sub>)  $\delta$  7.3 (t, 2H,  $J$  = 7.24 Hz), 7.41 (m, 6H), 7.73 (d, 2H,  $J$  = 7.70 Hz), 8.14 (d, 2H,  $J$  = 7.70 Hz);  $^{13}\text{C}$  NMR (400 MHz, CDCl<sub>3</sub>)  $\delta$  109.71, 120.37, 120.56, 121.03, 123.62, 126.25, 128.88, 133.27, 136.95, 140.73.

**Preparation of 3,6-dibromo-9-(4-bromophenyl)-9H-carbazole (S1-2 or 4).**<sup>20</sup> Compound **S1-1** (1.0 g, 3.10 mmol) was dissolved in dichloromethane (17 mL) in a Schlenk flask wrapped with aluminum foil. NBS (1.36 g, 7.69 mmol) was added as solid at 0 °C in the dark and the reaction mixture was stirred overnight (~16 h). It was quenched with water and extracted with dichloromethane (3 x 40 mL). The combined organic extracts were dried over anhydrous MgSO<sub>4</sub> and filtered. The organic layer was evaporated under reduced pressure. The residue was purified by silica gel chromatography with hexanes as the eluent to afford **S1-2 (4)** as a crystalline solid. Yield: 1.46 g (98%). m.p. 208-210 °C.  $^1\text{H}$  NMR (400 MHz, CDCl<sub>3</sub>)  $\delta$  7.21 (d, 2H,  $J$  = 8.75 Hz), 7.38 (d, 2H,  $J$  = 8.76 Hz), 7.50 (dd, 2H,  $J$  = 8.75 Hz, 1.9 Hz), 7.74 (d, 2H,  $J$  = 8.76 Hz), 8.18 (d, 2H,  $J$  = 1.9 Hz);  $^{13}\text{C}$  NMR (400 MHz, CDCl<sub>3</sub>)  $\delta$  111.46, 113.54, 121.90, 123.51, 124.21, 128.72, 129.74, 133.57, 136.00, 139.77.

### S8.2. Synthesis of 4,4'-bis(3,6-dibromo-9H-carbazol-9-yl)-1,1'-biphenyl (S2-2 or 5)

#### Scheme S2.

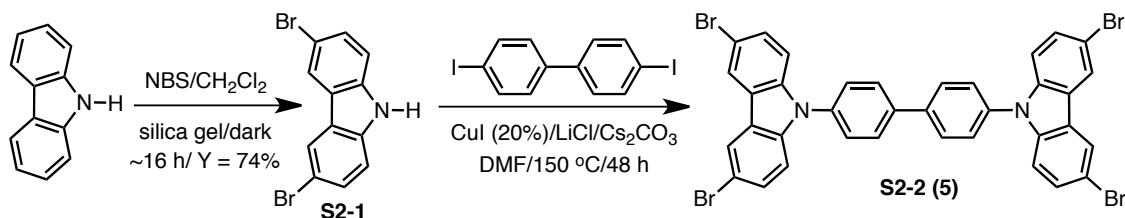

**Preparation of 3,6-dibromo-9H-carbazole (S2-1).**<sup>21</sup> Carbazole (0.5 g, 3.0 mmol) was dissolved in CH<sub>2</sub>Cl<sub>2</sub> (100 mL) and SiO<sub>2</sub> (10 g, dried beforehand at 120 °C) and NBS (1.07 g, 6.0 mmol) was added slowly. The reaction mixture was stirred overnight (~16 h) at 22 °C in the absence of light under argon atmosphere. The mixture was filtered and the silica gel was washed with CH<sub>2</sub>Cl<sub>2</sub> (3 x 30 mL). The combined organic layers were washed with brine (3 x 20 mL), dried over anhydrous MgSO<sub>4</sub>, filtered, and evaporated to give **S2-1** as a greenish solid, which was further purified by crystallization from a mixture of ethanol and water (70:30). Yield: 0.724 g (74%). m.p. 203-205 °C (lit.<sup>22</sup> m.p. 204-206 °C). <sup>1</sup>H NMR (400 MHz, CDCl<sub>3</sub>) δ 7.31 (d, 2H, *J* = 8.4 Hz), 7.52 (dd, 2H, *J* = 8.59 Hz, 2.0 Hz), 8.09 (br s, 1H), 8.12 (d, 2H, *J* = 2.0 Hz); <sup>13</sup>C NMR (400 MHz, CDCl<sub>3</sub>) δ 112.43, 112.82, 123.45, 124.28, 129.50, 138.52.

**Preparation of 4,4'-bis(3,6-dibromo-9H-carbazol-9-yl)-1,1'-biphenyl (S2-2 or 5).**<sup>23</sup> Compound **S2-1** (0.59 g, 1.83 mmol), Cs<sub>2</sub>CO<sub>3</sub> (0.59 g, 1.83 mmol), 4,4'-diiodobiphenyl (0.41 g, 1.01 mmol), CuI (0.035 g, 0.183 mmol), LiCl (0.077 g, 1.83 mmol) and DMF (6 mL) were added in a sealed tube with screw cap and stirred in a ~150 °C oil bath. After 48 hour, the reaction mixture was cooled to room temperature and was diluted with saturated aqueous ammonium chloride. The product was extracted with ethyl acetate and then with chloroform. The combined organic extracts were dried over anhydrous MgSO<sub>4</sub>, filtered and the solvent was evaporated under reduced pressure. The compound **S2-2 (or 5)** is partially soluble in most common organic solvents and therefore the accurate yield was determined. m.p. > 400 °C <sup>1</sup>H NMR (400 MHz, CDCl<sub>3</sub>) δ ppm = 7.36 (d, 2H, *J* = 8.70 Hz), 7.55 (dd, 2H, *J* = 8.89 Hz, 1.88 Hz), 7.65 (d, 2H, *J* = 8.33 Hz), 7.91 (d, 2H, *J* = 8.28 Hz), 8.23 (d, 2H, *J* = 1.88 Hz). <sup>13</sup>C NMR was not taken due to poor solubility in CDCl<sub>3</sub>.

### S8.3. Synthesis of tetrakis-(4-bromophenyl)benzidine (S3-2 or TAB).

#### Scheme S3.

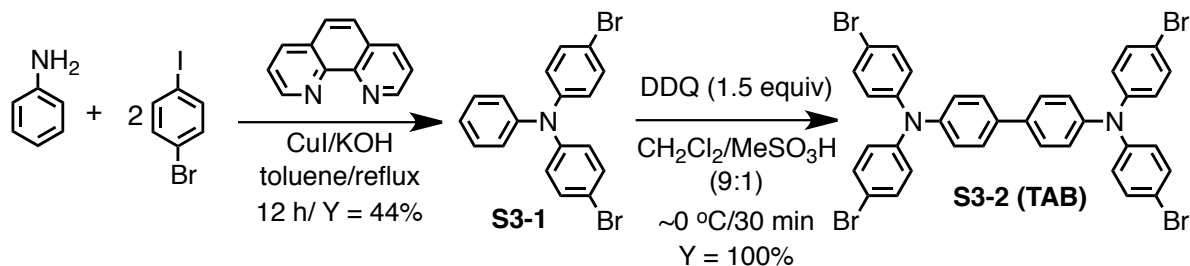

**Preparation of 4-bromo-N-(4-bromophenyl)-N-phenylaniline (S3-1).**<sup>24</sup> In a dry Schlenk flask a mixture of aniline (1.1 g, 12 mmol), 1-bromo-4-iodobenzene (8.5 g, 30 mmol), CuI (0.07 g, 0.36 mmol), 1,10-phenanthroline (0.065 g, 0.36 mmol), potassium hydroxide (5.2 g, 92 mmol) and toluene (60 mL) was stirred under an argon atmosphere at reflux for overnight (~16 h). The resulting mixture was then cooled to room temperature and poured into distilled water. The products were extracted with dichloromethane (4 x 50 mL), and the organic layers were dried over anhydrous MgSO<sub>4</sub>. The solvent was evaporated under reduced pressure, and the resulting crude product was purified by silica gel column chromatography using hexanes as an eluent to obtain **S1-1** as a colorless viscous liquid. Yield: 2.14 g (44%). <sup>1</sup>H NMR (400 MHz, CDCl<sub>3</sub>) δ 6.94 (d, 4H, *J* = 8.9 Hz), 7.06 (m, 3H), 7.27 (m, 2H), 7.34 (d, 4H, *J* = 8.9 Hz); <sup>13</sup>C NMR (400 MHz, CDCl<sub>3</sub>) δ 115.60, 123.88, 124.74, 125.55, 129.70, 132.48, 146.66, 147.04.

**Preparation of S3-2 (TAB).**<sup>25,26</sup> In a dry Schlenk flask compound **S1-1** (0.32 g, 0.79 mmol) was dissolved in dry dichloromethane (27 mL), cooled to 0 °C and after 5 minutes methanesulfonic acid (3 mL) was added under an argon atmosphere. DDQ (2,3-dichloro-5,6-dicyanobenzoquinone) (0.27 g, 1.2 mmol) was added as solid, and the resulting mixture was stirred for 30 minutes. The reaction was quenched with saturated aqueous NaHCO<sub>3</sub> solution (50 mL) and extracted with dichloromethane (3 x 25 mL). The organic extracts were washed with water, and dried over anhydrous MgSO<sub>4</sub>. Solvent was removed under reduced pressure and the resulting crude solid was crystallized from acetonitrile to afford **TAB** as a colorless crystalline solid in nearly quantitative yield. m.p. 226-227 °C. <sup>1</sup>H NMR (400 MHz, CDCl<sub>3</sub>) δ 6.97



(d, 4H,  $J = 8.93$  Hz), 7.09 (d, 2H,  $J = 8.64$  Hz), 7.36 (d, 4H,  $J = 8.93$  Hz), 7.45 (d, 2H,  $J = 8.7$  Hz);  $^{13}\text{C}$  NMR (400 MHz,  $\text{CDCl}_3$ )  $\delta$  115.88, 124.68, 125.78, 127.85, 132.60, 135.63, 146.16, 146.53.

#### S8.4. Synthesis of 2-bromo- $N^t$ , $N^t$ , $N^t$ , $N^t$ -tetrakis(4-bromophenyl)-[1,1'-biphenyl]-4,4'-diamine (**S4-4** or **6**)

Scheme S4.

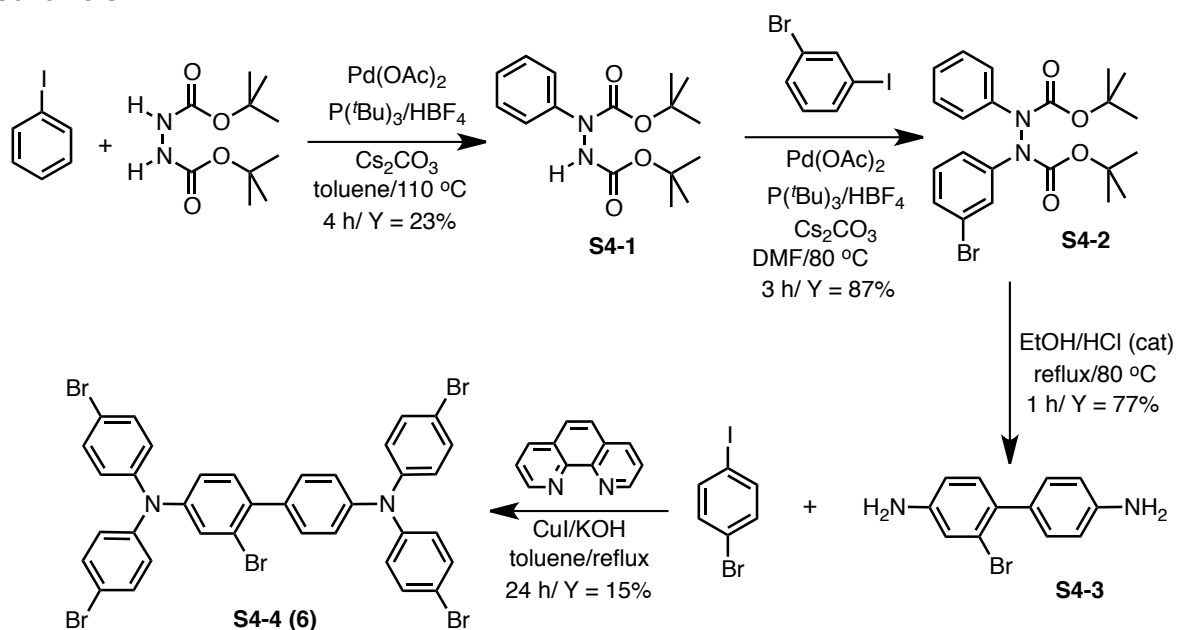

**Preparation of di-tert-butyl-1-phenylhydrazine-1,2-dicarboxylate (**S4-1**).**<sup>27</sup> A sealed tube were charged with iodobenzene (1.83 g, 8.97 mmol), di-tert-butylhydrazine-1,2-dicarboxylate (2.5 g, 10.76 mmol),  $\text{Pd}(\text{OAc})_2$  (0.1 g, 0.45 mmol),  $\text{P}(\text{t-Bu})_3 \cdot \text{HBF}_4$  (0.26 g, 0.89 mmol),  $\text{Cs}_2\text{CO}_3$  (4.09 g, 12.55 mmol) and dry toluene (20 mL) at room temperature. The reaction mixture was degassed, tube was filled with argon, sealed with a screw cap and heated at 110 °C for 4h. The reaction mixture was then cooled to room temperature and filtered through a short pad of silica gel using ethyl acetate as the eluent. The organic solution was concentrated and purified by flash column chromatography on silica gel (hexanes:ethyl acetate = 10:1) to afford hydrazide **S4-1** as a pale yellow solid. Yield = 0.75 g (23%). m.p. 78-80 °C.  $^1\text{H}$  NMR (400 MHz,  $\text{CDCl}_3$ )  $\delta$  1.49 (s, 18H), 6.81/6.60 (rotamers, 2 x br s, 1H,  $\text{NH}(\text{Boc})$ ), 7.13 – 7.17 (m, 1H), 7.33 – 7.29 (m, 2H), 7.40 (m, 2H);  $^{13}\text{C}$  NMR (400 MHz,  $\text{CDCl}_3$ )  $\delta$  28.26, 28.31, 81.6, 82.3, 123.8, 125.6, 128.5, 142.3, 153.7, 155.5.

**Preparation of di-tert-butyl-1-(3-bromophenyl)-2-phenylhydrazine-1,2-dicarboxylate (**S4-2**).**<sup>28</sup> A sealed tube was charged with 1-bromo-3-iodobenzene (0.41 g, 1.46 mmol), **S4-1** (0.41 g, 1.32 mmol),  $\text{CuI}$  (0.28 g, 1.46 mmol), 1,10-phenanthroline (0.26 g, 1.46 mmol),  $\text{Cs}_2\text{CO}_3$  (0.47 g, 1.46 mmol) and DMF (3.0 mL) at room temperature. The reaction mixture was degassed, tube was filled with argon, sealed with screw cap and heated at 80 °C for 3 h. The reaction mixture was then cooled to room temperature and filtered through a short pad of silica gel using ethyl acetate as the eluent. The organic solution was concentrated and purified by flash column chromatography on silica gel using hexanes as the eluent to afford compound **S4-2**. Yield: 0.54 g, 87%.  $^1\text{H}$  NMR (400 MHz,  $\text{CDCl}_3$ )  $\delta$  7.14-7.18 (t, 2H,  $J = 7.9$  Hz), 7.26-7.40 (m, 6H), 7.66 (bs, 1H);  $^{13}\text{C}$  NMR (400 MHz,  $\text{CDCl}_3$ )  $\delta$  28.26, 28.29, 83.3, 83.5, 121.1 (bs), 122.7, 122.9 (bs), 126.4, 129.0, 129.3, 130.5, 135.0, 141.5, 143.1, 153.4, 153.6.

**Preparation of 2-bromo-[1,1'-biphenyl]-4,4'-diamine (S4-3).**<sup>28</sup> A Schlenk flask was charged with **S4-2** (0.47 g, 1.01 mmol), 10 mL of ethanol and 0.5 mL of conc. HCl at room temperature. The reaction mixture was heated to reflux for 1 h. The resulting mixture was then cooled to 0 °C, neutralized with aqueous NaHCO<sub>3</sub>, extracted with dichloromethane and dried over anhydrous MgSO<sub>4</sub>, filtered and the solvent was evaporated under reduced pressure. The crude product was purified by silica gel chromatography to afford **S4-3** which was rather unstable and was used in the next step without further purification. Yield: ~77%. <sup>1</sup>H NMR (400 MHz, CDCl<sub>3</sub>) δ 3.71 (bs, 4H), 6.63 (dd, 1H, *J* = 8.23 Hz, 2.4 Hz), 6.70 (d, 2H, *J* = 8.63 Hz), 6.97 (d, 1H, *J* = 2.38 Hz), 7.08 (d, 1H, *J* = 8.23 Hz), 7.18 (d, 2H, *J* = 8.63 Hz); <sup>13</sup>C NMR (400 MHz, CDCl<sub>3</sub>) δ 114.35, 114.56, 119.07, 123.33, 130.65, 131.57, 131.86, 132.70, 145.51, 146.33.

**2-bromo-*N*<sup>4</sup>,*N*<sup>4</sup>,*N*<sup>4</sup>,*N*<sup>4</sup>-tetrakis(4-bromophenyl)-[1,1'-biphenyl]-4,4'-diamine (S4-4 or 6).**<sup>24</sup> In a dry Schlenk flask, a mixture of **S4-3** (0.28 g, 1.06 mmol), 1-bromo-4-iodobenzene (1.23 g, 4.36 mmol), CuI (0.08 g, 0.42 mmol), 1,10-phenanthroline (0.076 g, 0.42 mmol), potassium hydroxide (0.45 g, 8.15 mmol) and toluene (20 mL) was stirred and refluxed under argon atmosphere for 24h. The mixture was then cooled to room temperature and poured into distilled water. The products were extracted with dichloromethane (4 x 50 mL) and the organic layers were dried over anhydrous MgSO<sub>4</sub>, filtered and evaporated under reduced pressure. The resulting crude product was purified by silica gel column chromatography using hexanes as the eluent. The brown solid was further purified by multiple treatment with charcoal (20 mg) in dichloromethane (100 mL). The resulting solid was crystallized from a mixture of acetonitrile and dichloromethane to afford **S4-4** (or **6**) as pale yellow solid. Yield: 0.14 g, (15%). m.p. 244-246 °C. <sup>1</sup>H NMR (400 MHz, CDCl<sub>3</sub>) δ 6.99 (m, 9H), 7.06 (d, 2H, *J* = 8.68 Hz), 7.19 (d, 1H, *J* = 8.40 Hz), 7.30 (m, 3H), 7.38 (m, 8H); <sup>13</sup>C NMR (400 MHz, CDCl<sub>3</sub>) δ 116.03, 116.64, 122.54, 123.12, 123.17, 126.04, 126.16, 127.73, 130.68, 131.86, 132.61, 132.79, 135.40, 136.53, 145.97, 146.30, 146.44, 147.09.

### S8.5. Synthesis of 3-bromo-*N*<sup>4</sup>,*N*<sup>4</sup>,*N*<sup>4</sup>,*N*<sup>4</sup>-tetrakis(4-bromophenyl)-[1,1'-biphenyl]-4,4'-diamine (S5-5 or 7).

**Scheme 5.**

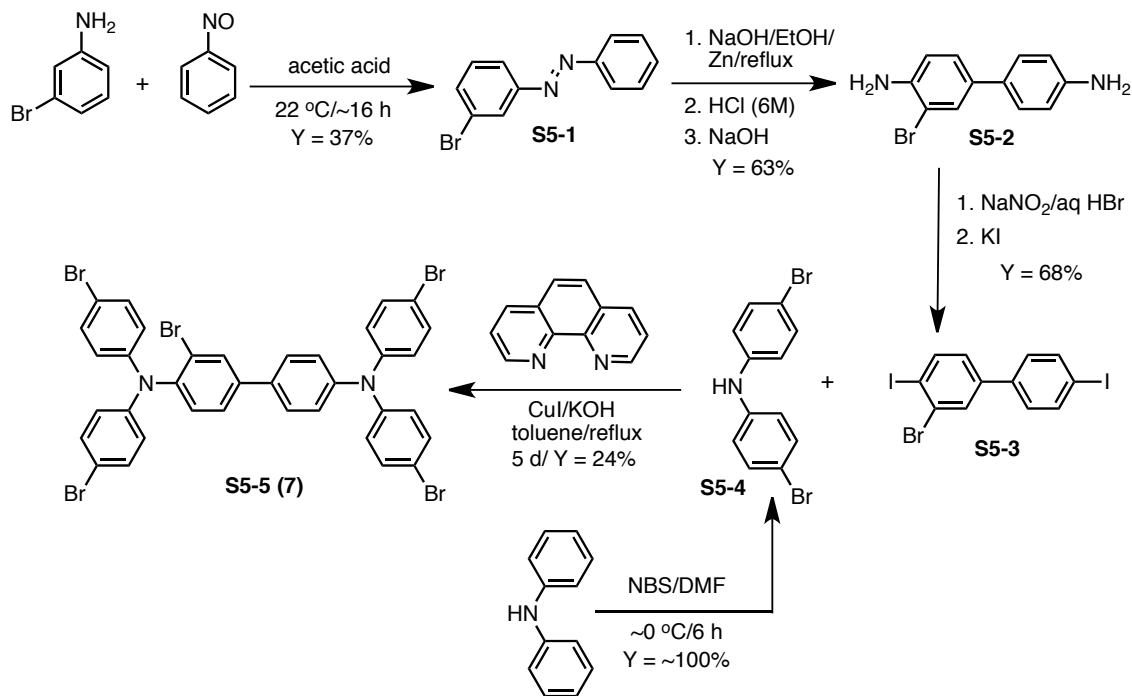

**Preparation of (E)-1-(3-bromophenyl)-2-phenyldiazene (S5-1)**<sup>29</sup> To a solution of nitrosobenzene (5.25 g, 49.01 mmol) in glacial acetic acid (40 mL), 2-bromoaniline (10.11 g, 58.81 mmol) was added resulting immediately into a green solution. The mixture was stirred overnight (~16 h) at 22 °C after which time it turned deep red. The reaction mixture was poured into 700 mL of water. Aqueous NaOH (50 g in 300 mL water) was added slowly until the solution was almost neutralized (tested by pH paper). **[Caution: Addition of alkali to this reaction mixture is highly exothermic!]** The resulting solution was extracted with diethyl ether (3 x 100 mL) and the combined ether extracts were washed with aqueous Na<sub>2</sub>CO<sub>3</sub> solution (2 x 100 mL). The ethereal solution was then treated with a mixture of diethyl ether and HCl (30 mL HCl in 50 mL diethyl ether). The precipitated 2-bromoaniline hydrochloride was filtered off, and the filtrate evaporated to about 100 mL. The red solution containing bromoazobenzene **S5-1** was subjected to column chromatography on basic alumina using diethyl ether as the eluent. The resulting red oil from chromatographic separation solidified upon treating with ethanol-solid carbon dioxide (dry ice). The red solid mass was allowed to warm to 0 °C and was filtered. Yield: 4.84 g (37%). m.p. 35-36 °C (lit.<sup>22</sup> m.p. 36 °C). <sup>1</sup>H NMR (400 MHz, CDCl<sub>3</sub>) δ 7.32 (td, 1H, J = 7.61 Hz, 1.67 Hz, 0.65 Hz), 7.40 (td, 1H, 7.7 Hz, 1.67 Hz, 0.70 Hz), 7.53 (m, 3H), 7.68 (dd, 1H, J = 7.96 Hz, 1.75 Hz), 7.76 (dd, 1H, J = 7.88 Hz, 1.33 Hz), 7.98 (m, 2H); <sup>13</sup>C NMR (400 MHz, CDCl<sub>3</sub>) δ 117.95, 123.58, 125.89, 128.14, 129.33, 131.75, 132.04, 133.89, 149.76, 152.76.

**Preparation of 3-bromo-[1,1'-biphenyl]-4,4'-diamine (S5-2)**<sup>29</sup> To a solution of bromoazobenzene **S5-1** (3.26 g) in ethanol (40 mL) zinc dust (1.70 g, 26.20 mmol) was added and the mixture was stirred. An aqueous ethanolic solution of NaOH (2 g NaOH dissolved in 5.0 mL water + 35 mL ethanol) was added to the above reaction mixture and it was refluxed until the red color disappeared (~2 h). It was then cooled to ambient temperature and filtered into an excess of concentrated hydrochloric acid. The solid Zn-residue was washed with warm ethanol and the washings were added to the main filtrate. The resulting precipitate of 3-bromobenzidine hydrochloride was filtered and the precipitate was added to an aqueous NaOH solution (20 g NaOH in 300 mL H<sub>2</sub>O) and stirred for 20 min, and then extracted with dichloromethane (3 x 30 mL) and dried over anhydrous MgSO<sub>4</sub>. The solvent was removed under reduced pressure and crude product was crystallized from dilute aqueous HCl solution to afford pure **S5-2**. Yield: 2.08 g (63%). m.p. 79-81 °C (lit.<sup>22</sup> m.p. 81 °C). <sup>1</sup>H NMR (400 MHz, CDCl<sub>3</sub>) δ 3.69 (bs, 2H), 4.06 (bs, 2H), 6.72 (d, 2H, J = 8.71 Hz), 6.79 (d, 1H, J = 8.31 Hz), 7.31 (m, 3H), 7.60 (d, 1H, J = 2.17 Hz); <sup>13</sup>C NMR (400 MHz, CDCl<sub>3</sub>) δ 109.94, 115.55, 116.11, 126.46, 127.41, 130.30, 130.39, 133.11, 142.57, 145.54.

**Preparation of 3-bromo-4,4'-diiodo-1,1'-biphenyl (S5-3)**<sup>30</sup> To a stirred solution of **S5-2** (0.5 g, 1.90 mmol) in 48% HBr (3.0 mL) and water (10.0 mL) at 0 °C was added slowly an aqueous solution of NaNO<sub>2</sub> (0.393 g, 5.70 mmol in 5 mL H<sub>2</sub>O). The resulting mixture was stirred vigorously for 1h at ~0 °C. A cold aqueous solution of KI (6.30 g, 38 mmol in 10.0 mL H<sub>2</sub>O) was added in above reaction mixture dropwise and it was allowed to stir and warm to room temperature stir during the course of overnight (~16 h). The reaction mixture was then diluted with dichloromethane (100 mL) and washed with 10% aqueous NaOH solution (100 mL) and Na<sub>2</sub>S<sub>2</sub>O<sub>3</sub> solution (100 mL) and dried over anhydrous MgSO<sub>4</sub>, filtered, and the solvent was removed under reduced pressure. The resulting crude product was purified through flash column chromatography using hexanes as the eluent to afford pure **S5-3**. Yield: 0.63 g (68%). m.p. 81-83 °C. <sup>1</sup>H NMR (400 MHz, CDCl<sub>3</sub>) δ 7.16 (dd, 1H, J = 8.23 Hz, 2.14 Hz), 7.26 (d, 2H, J = 8.04 Hz), 7.77 (d, 2H, J = 8.60 Hz), 7.80 (d, 1H, J = 2.14 Hz), 7.90 (d, 1H, J = 8.23 Hz); <sup>13</sup>C NMR (400 MHz, CDCl<sub>3</sub>) δ 94.37, 100.29, 126.99, 128.78, 130.55, 131.03, 138.28, 138.32, 140.78, 141.85.

**Preparation of bis(4-bromophenyl)amine (S5-4)**<sup>31</sup> A solution of *N*-bromosuccinimide (5.27 g, 29.6 mmol) in DMF (25 mL) was added dropwise during the course of 30 min to a stirred solution of diphenylamine (2.5 g, 14.8 mmol) in DMF (25 mL) at ~0 °C. The resulting mixture was stirred at ~0 °C for 6 h. Water was added and the precipitate was filtered, washed with water and dried in vacuo to afford **S5-4** as a colorless solid. Yield: 4.83 g (~100%). m.p. 104-106 °C (lit.<sup>32,33</sup> m.p. 105-107 °C). <sup>1</sup>H NMR (400 MHz, CDCl<sub>3</sub>) δ 5.65 (bs, 1H), 6.91 (d, 4H, J = 8.75 Hz), 7.36 (d, 4H, J = 8.75 Hz); <sup>13</sup>C NMR (400 MHz, CDCl<sub>3</sub>) δ 113.56, 119.65, 132.55, 141.86.

**Preparation of 3-bromo-*N*<sup>4</sup>,*N*<sup>4</sup>,*N*<sup>4</sup>,*N*<sup>4</sup>-tetrakis(4-bromophenyl)-[1,1'-biphenyl]-4,4'-diamine (S5-5 or 7)**<sup>24</sup> In a dry Schlenk flask, a mixture of **S5-3** (0.40 g, 0.82 mmol), *bis*(4-bromophenyl)amine (**S5-4**,

0.56 g, 1.73 mmol), CuI (0.033 g, 0.173 mmol), 1,10-phenanthroline (0.031 g, 0.173 mmol), potassium hydroxide (0.77 g, 13.84 mmol) and toluene (30 mL) was refluxed under an argon atmosphere for 5 d. After which time it was cooled to room temperature and poured into distilled water, and extracted with dichloromethane (4 x 20 mL). The organic layers were dried over anhydrous MgSO<sub>4</sub>, filtered, and the solvent evaporated under reduced pressure. The resulting crude product was purified by silica gel column chromatography using hexanes as the eluent to afford **S5-5 (or 7)**. Yield: 0.18 g (24%). m.p. 213-215 °C. <sup>1</sup>H NMR (400 MHz, CDCl<sub>3</sub>) δ 6.87 (d, 4H, *J* = 8.95 Hz), 6.98 (d, 4H, *J* = 8.95 Hz), 7.11 (d, 2H, *J* = 8.74 Hz) 7.23 (d, 1H, *J* = 8.25 Hz), 7.34 (d, 4H, *J* = 8.95 Hz), 7.38 (d, 4H, *J* = 8.95 Hz), 7.44 (d, 2H, *J* = 8.75 Hz), 7.49 (dd, 1H, *J* = 8.28 Hz, 2.17 Hz), 7.82 (d, 1H, *J* = 2.09 Hz); <sup>13</sup>C NMR (400 MHz, CDCl<sub>3</sub>) δ 115.18, 116.27, 123.72, 123.81, 124.23, 126.03, 127.37, 128.14, 131.46, 132.39, 132.69, 132.78, 133.64, 140.38, 143.35, 145.75, 146.31, 147.05.

**S8.6. Synthesis 3,3'-dibromo-*N,N,N',N'*-tetrakis(4-bromophenyl)-[1,1'-biphenyl]-4,4'-diamine (S6-3 or 8).**

**Scheme S6.**

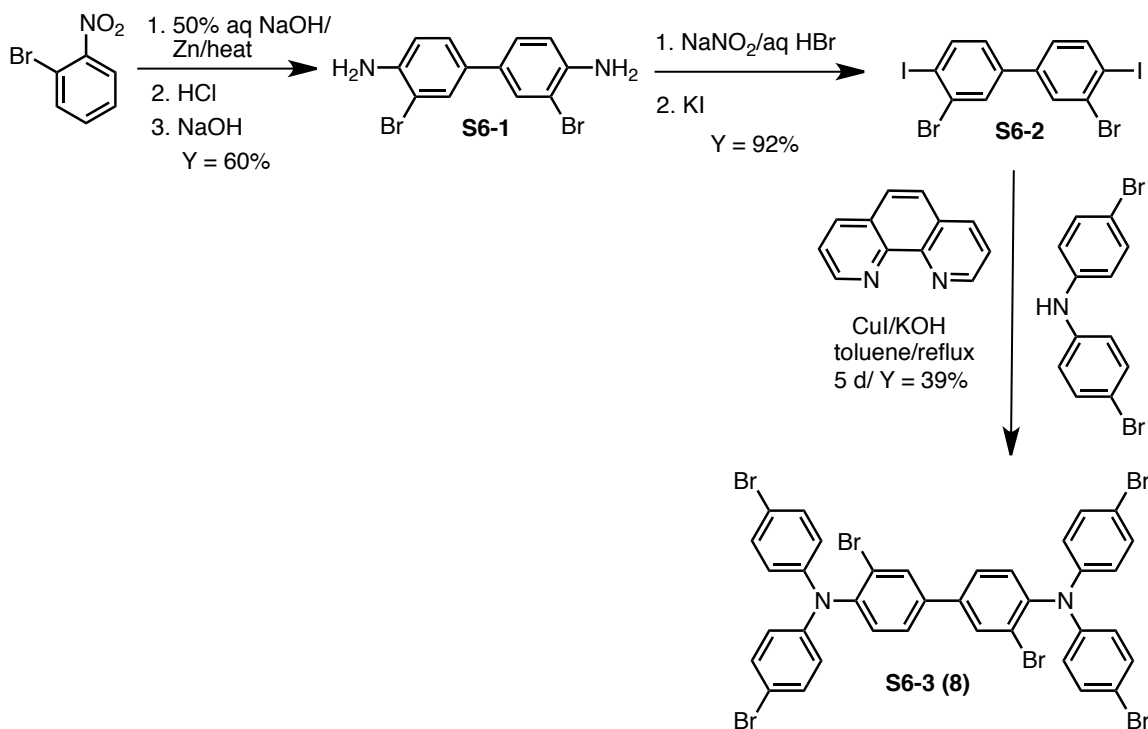

**Preparation of 3,3'-dibromo-[1,1'-biphenyl]-4,4'-diamine (S6-1).**<sup>34</sup> A mixture of *o*-nitrobromobenzene (5.5 g) and 50% aqueous sodium hydroxide (1.5 mL) was stirred at 60 °C, and zinc dust was added intermittently in small portions such that the temperature did not exceed beyond 70-80 °C. After 3.5 g of zinc had been added, the resulting sludge was diluted with water (12.5 mL) and 20% aqueous sodium hydroxide (7.5 mL). Another portion of zinc (5 g) was added at once and the resulting mixture was stirred at 70-80 °C until it was nearly colorless. The resulting mixture was cooled to room temperature and poured slowly into 25% sulfuric acid (50 mL) cooled to ~10 °C and then filtered. The blackish-ash colored solid was triturated with diethyl ether (2 x 100 mL). Combined ether extracts were dried over anhydrous MgSO<sub>4</sub>, filtered, and evaporated under reduced pressure. The crude solid was dissolved in 50 mL ether and slowly poured into a stirred concentrated HCl (20 mL) cooled in an ice bath (0 °C). After stirring for 1 hour, the precipitated salt was filtered and washed with ether. The hydrochloride salt was suspended in excess 10% aqueous sodium hydroxide and heated on a steam bath for 1h. The

free base was extracted from the cooled mixture with ether and the ether extracts were dried over anhydrous  $\text{MgSO}_4$  and evaporated. The crude product was crystallized from a mixture of ethanol and water to afford pure **S6-1**. Yield: 2.79 g (60%). m.p. 128-129 °C (lit.<sup>34</sup> m.p. 127-129 °C).  $^1\text{H}$  NMR (400 MHz,  $\text{CDCl}_3$ )  $\delta$  4.09 (bs, 4H), 6.79 (d, 2H,  $J$  = 8.28 Hz), 7.25 (dd, 2H,  $J$  = 8.28 Hz, 2.10 Hz), 7.56 (d, 2H,  $J$  = 2.10 Hz);  $^{13}\text{C}$  NMR (400 MHz,  $\text{CDCl}_3$ )  $\delta$  109.90, 116.13, 126.54, 130.44, 131.71, 143.04.

**Preparation of 3,3'-dibromo-4,4'-diiodo-1,1'-biphenyl (S6-2).**<sup>31</sup> Using a slightly modified literature procedure, a stirred solution of **S6-1** (0.5 g, 1.46 mmol) in a mixture of 48% HBr (3.0 mL) and water (10.0 mL) at  $\sim 0$  °C was added dropwise an aqueous solution of  $\text{NaNO}_2$  (0.302 g, 4.38 mmol in 5 mL  $\text{H}_2\text{O}$ ). After addition of  $\text{NaNO}_2$ , the reaction mixture was stirred vigorously for 1h at  $\sim -5$  °C. A cold aqueous solution of KI (4.84 g, 29.2 mmol in 10 mL  $\text{H}_2\text{O}$ ) was added to the above reaction mixture slowly, and it was stirred overnight ( $\sim 16$  h) and was allowed to warm to room temperature. The reaction mixture was diluted with dichloromethane (100 mL) and washed with aqueous 10% NaOH solution (100 mL) and aqueous  $\text{Na}_2\text{S}_2\text{O}_3$  solution (100 mL). Combined organic extracts were dried over anhydrous  $\text{MgSO}_4$ , filtered, and evaporated under reduced pressure. The crude product was purified by silica gel column chromatography using hexanes as the eluent to afford pure **S6-2**. Yield: 0.76 g (92%). m.p. 179-181 °C.  $^1\text{H}$  NMR (400 MHz,  $\text{CDCl}_3$ )  $\delta$  7.15 (dd, 2H,  $J$  = 8.27 Hz, 2.18 Hz), 7.78 (d, 2H,  $J$  = 2.18 Hz), 7.91 (d, 2H,  $J$  = 8.27 Hz);  $^{13}\text{C}$  NMR (400 MHz,  $\text{CDCl}_3$ )  $\delta$  101.14, 126.98, 130.73, 131.02, 140.53, 140.93.

**Preparation of 3,3'-dibromo- $N^4,N^4,N^4',N^4'$ -tetrakis(4-bromophenyl)-[1,1'-biphenyl]-4,4'-diamine (S6-3 or 8).**<sup>24</sup> In a dry Schlenk flask, a mixture of compound **S6-2** (0.40 g, 0.71 mmol), bis(4-bromophenyl)amine **10** (0.48 g, 1.48 mmol), CuI (0.28 g, 0.148 mmol), 1,10-phenanthroline (0.26 g, 0.148 mmol), potassium hydroxide (0.66 g, 11.90 mmol) and toluene (30 mL) was refluxed under an argon atmosphere for 5 d. The mixture was then cooled to room temperature and poured into distilled water and extracted with dichloromethane (4 x 50 mL). The organic layer was dried over anhydrous  $\text{MgSO}_4$ , filtered, evaporated. The crude product was purified by silica gel column chromatography using hexanes as the eluent to afford pure **S6-3 (8)**. Yield: 0.27 g (39%). m.p. 228-230 °C  $^1\text{H}$  NMR (400 MHz,  $\text{CD}_2\text{Cl}_2$ )  $\delta$  6.87 (d, 8H,  $J$  = 8.95 Hz), 7.27 (d, 2H,  $J$  = 8.25 Hz), 7.35 (d, 8H,  $J$  = 8.95 Hz), 7.55 (dd, 2H,  $J$  = 8.25 Hz, 2.20 Hz), 7.87 (d, 2H,  $J$  = 2.20 Hz);  $^{13}\text{C}$  NMR (400 MHz,  $\text{CD}_2\text{Cl}_2$ )  $\delta$  115.52, 124.13, 124.24, 128.16, 132.00, 132.71, 133.50, 139.06, 144.68, 146.12.

### S8.7. Synthesis of 2,2'-dibromo- $N^4,N^4,N^4',N^4'$ -tetrakis(4-bromophenyl)-[1,1'-biphenyl]-4,4'-diamine (S7-2 or 9).

Scheme S7.

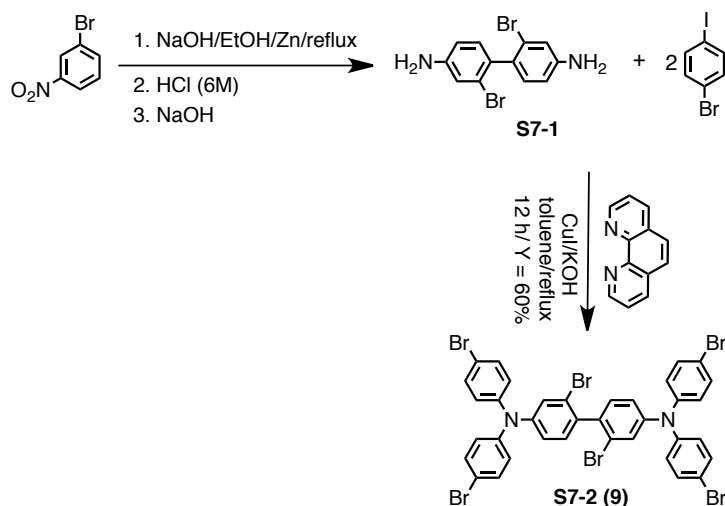

**Preparation of 2,2'-dibromo-[1,1'-biphenyl]-4,4'-diamine (S7-1).**<sup>35</sup> To a stirred solution of 3-bromonitrobenzene (5.5 g, 27.2 mmol) in ethanol (60 mL) were added in portions a solution of sodium hydroxide (2.5 g in 15 mL water) and zinc powder (10 g). The mixture was brought to 70 °C and after 15 minutes, more zinc (6 g) was added. After an additional 15 min, the mixture became pale yellow. It was then brought to a boil and filtered under an argon atmosphere. The zinc residue was washed with ethanol (2 x 10 mL). The combined filtrate was mixed with water (50 mL), and the mixture was cooled in an ice bath, which resulted in a pale yellow precipitate. The filtered precipitate was added to hydrochloric acid (6 M, 50 mL) and stirred at 60 °C for 15 minutes, then cooled rapidly. The solid benzidine hydrochloride was collected, washed with 6M hydrochloric acid and diethyl ether, and suspended in warm water containing excess sodium hydroxide. This mixture was extracted with diethyl ether (3 x 50 mL) and the extracts were dried over anhydrous MgSO<sub>4</sub>, filtered, and evaporated. The crude benzidine **S7-1** was crystallized from ethanol-water mixture. Yield: 0.85 g (18%). m.p. 150-152 °C (lit. <sup>35</sup> m.p. 151-153°C). <sup>1</sup>H NMR (400 MHz, CDCl<sub>3</sub>) δ 3.74 (br s, 4 H for NH<sub>2</sub>), 6.64 (dd, 2H, *J* = 8.18 Hz, 2.36 Hz), 6.97 (d, 2H, *J* = 2.33 Hz), 7.00 (d, 2H, *J* = 8.18 Hz); <sup>13</sup>C NMR (400 MHz, CDCl<sub>3</sub>) δ 113.95, 118.44, 124.95, 132.17, 132.24, 146.99.

**Preparation of 2,2'-dibromo-*N,N,N',N'*-tetrakis(4-bromophenyl)-[1,1'-biphenyl]-4,4'-diamine (S7-2 or 9).**<sup>24</sup> In a dry Schlenk flask, a mixture of **S7-1** (0.4 g, 1.17 mmol), 1-bromo-4-iodobenzene (1.35 g, 4.8 mmol), CuI (0.013 g, 0.07 mmol), 1,10-phenanthroline (0.012 g, 0.07 mmol), potassium hydroxide (0.502 g, 8.96 mmol), and toluene (35 mL) was refluxed under an argon atmosphere for 24 h. The mixture was then cooled to room temperature and poured into distilled water. The crude product was extracted with dichloromethane (4 x 50 mL) and the combined organic layers were dried over anhydrous MgSO<sub>4</sub>, filtered, and evaporated. The crude product was purified by silica gel column chromatography using hexanes as the eluent to afford **S7-2** (or **9**) as a brown-colored solid. The colored impurities were removed by repeated treatments (3 times) with charcoal (20 mg) in refluxing dichloromethane (25 mL) followed by crystallization from a mixture of acetonitrile and chloroform to afford shiny crystals of **S7-2** (or **9**). Yield: 0.67 g (60%). m.p. 278-280 °C. <sup>1</sup>H NMR (400 MHz, CDCl<sub>3</sub>) δ 7.00 (m, 10H), 7.11 (d, 2H, *J* = 8.32 Hz), 7.29 (d, 2H, *J* = 2.37 Hz), 7.40 (d, 8H, *J* = 8.80 Hz); <sup>13</sup>C NMR (400 MHz, CDCl<sub>3</sub>) δ 116.89, 121.56, 124.53, 126.38, 126.45, 131.95, 132.87, 135.93, 145.91, 147.67.

### S8.8. Synthesis of *tris*(2-bromo-4-(*tert*-butyl)phenyl)amine (S8-2 or BC)

**Scheme S8.**

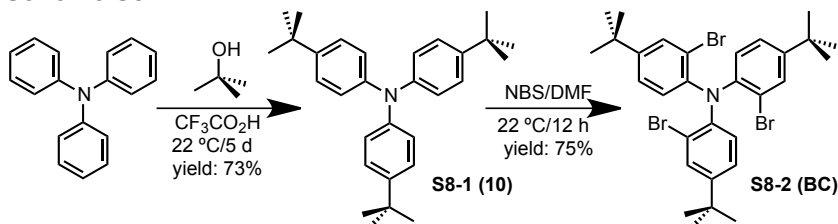

**Preparation of *tris*(4-(*tert*-butyl)phenyl)amine (S8-1 or 10).**<sup>36</sup> A mixture of triphenylamine (1.23 g, 5 mmol), 2-methylpropane-2-ol (5 ml), and trifluoroacetic acid (20 mL) was stirred at 22 °C for 5 days. After which time the resulting precipitate thus formed was filtered, dried and recrystallized from a mixture of dichloromethane and hexanes to afford pure **S8-1** (or **10**). Yield: 1.5 g (73%), m.p. 286-288 °C (lit. <sup>37</sup> m.p. 276-278 °C). <sup>1</sup>H NMR (CDCl<sub>3</sub>) δ 1.30 (s, 27H), 7.01 (d, *J* = 8.3Hz, 6H), 7.23 (d, *J* = 8.3Hz, 6H); <sup>13</sup>C NMR (CDCl<sub>3</sub>) δ 31.37, 34.14, 123.42, 125.93, 145.09, 145.44.

**Preparation of *tris*(2-bromo-4-(*tert*-butyl)phenyl)amine (S8-2 or BC).** A solution of 4-(*tert*-butyl)phenyl)amine (0.35 g, 0.85 mmol) in dichloromethane (15 mL) was added a solution of NBS (0.53 g, 2.96 mmol) in DMF (5 mL) dropwise under an argon atmosphere, and stirred overnight (~16 h) at 22 °C. The reaction mixture was quenched with water and extracted with dichloromethane (3 x 25 mL). Combined organic extracts were dried over anhydrous MgSO<sub>4</sub>, filtered, and evaporated. The crude product was filtered through a short pad of silica gel using dichloromethane as the elutant followed by recrystallization from a mixture of dichloromethane and hexanes to afford pure **S8-2** (or **BC**). Yield: 0.42 g

(75%), m.p. 238-240 °C.  $^1\text{H}$  NMR ( $\text{CDCl}_3$ )  $\delta$  1.30 (s, 27H), 6.74 (d,  $J = 8.36\text{Hz}$ , 3H), 7.19 (d,  $J = 8.36\text{Hz}$ , 2.23Hz, 3), 7.56 (d,  $J = 2.23\text{Hz}$ , 3H);  $^{13}\text{C}$  NMR ( $\text{CDCl}_3$ )  $\delta$  31.48, 34.60, 121.23, 125.07, 126.70, 131.60, 143.51, 148.87.

### S8.9. General procedures for preparative isolation cation-radical hexachloroantimonate salts.

**Preparation of  $\text{MB}^{+\cdot}\text{SbCl}_6^-$  using  $\text{NO}^+\text{SbCl}_6^-$ .** A 50-mL flask fitted with a Schlenk adaptor was charged with nitrosonium hexachloroantimonate (44 mg, 0.12 mmol) was added a cold solution ( $\sim 0^\circ\text{C}$ ) of  $\text{MB}^0$  (58 mg, 0.12 mmol) in anhydrous dichloromethane (5 mL) under an argon atmosphere at  $-10^\circ\text{C}$ . The solution immediately took on a blue coloration and was stirred (while slowly bubbling argon through the solution to entrain gaseous NO) for 10 min to yield a blue solution of  $\text{MB}^{+\cdot}\text{SbCl}_6^-$ . To this solution was then added dry ether (15 mL) to precipitate the dissolved  $\text{MB}^{+\cdot}\text{SbCl}_6^-$  salt. The microcrystalline precipitate was filtered using a medium-grade sintered-glass funnel under a blanket of dry nitrogen and washed with dry diethyl ether (2 x 5 mL) using a basic apparatus set-up shown below. The resulting salt was dried *in vacuo* at room temperature to afford  $\text{MB}^{+\cdot}\text{SbCl}_6^-$  in essentially quantitative yield (0.89 g, 91%).

**Preparation of  $\text{MB}^{+\cdot}\text{SbCl}_6^-$  using  $\text{SbCl}_5$ .** A solution of  $\text{MB}^0$  (0.96 g, 2 mmol) in anhydrous dichloromethane (20 mL) in a flask equipped with a dropping funnel and argon inlet and outlet adapters. The dropping funnel was charged with a solution of  $\text{SbCl}_5$  in dichloromethane (2 mL, 1 M) and the flask was cooled in a dry ice-acetone bath (approximately  $-78^\circ\text{C}$ ). The  $\text{SbCl}_5$  solution was slowly added (3-5 min) under a flow of argon. The reaction mixture immediately turned blue and a large amount of dark-blue material precipitated. The resultant mixture was warmed to  $\sim 0^\circ\text{C}$  during 5-10 min, and anhydrous diethyl ether (30 mL) was added to precipitate the dissolved  $\text{MB}^{+\cdot}\text{SbCl}_6^-$  salt. The dark-blue microcrystalline precipitate was suction filtered using a medium-grade sintered-glass funnel under a blanket of dry argon and washed with dry diethyl ether (2 x 20 mL) using a basic apparatus set-up shown below. The resulting salt was dried *in vacuo* at room temperature to afford  $\text{MB}^{+\cdot}\text{SbCl}_6^-$  in 88% yield (1.43 g, 88%).

**A basic apparatus for filtration of cation-radical salts under argon atmosphere.** A large inverted funnel, connected to a argon outlet, positioned above the sintered glass funnel is generally sufficient for maintaining an inert atmosphere during filtration of the cation radical salt (see sketch of the apparatus below).

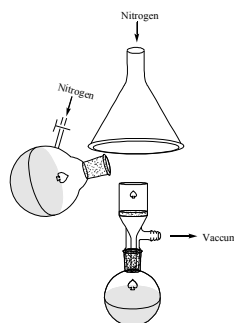

Similar procedures were used for preparative isolation of  $\text{BC}^{+\cdot}\text{SbCl}_6^-$ .

### S8.10. Preparation of the $\text{TAB}^{+\cdot}\text{SbCl}_6^-$ salt.

A 25 mL schlenk tube equipped with a magnetic stir bar was charged with a solution of the tetrakis (4-bromophenyl) benzidine **TAB** (30 mg, 0.037 mmol) in anhydrous dichloromethane (5 mL) under argon atmosphere. Then triethyloxonium hexachloroantimonate  $\text{Et}_3\text{O}^+\text{SbCl}_6^-$  (32 mg, 0.074 mmol) was added under an argon atmosphere at  $\sim 0^\circ\text{C}$  and stirred for 30 minutes. The mixture immediately took on a yellowish-orange coloration which intensified with time. The dark colored mixture was layered with dry toluene (10 mL) and kept it in refrigerator for overnight which gives an orange colored crystal of  $\text{TAB}^{+\cdot}\text{SbCl}_6^-$ .

## S9. NMR Spectroscopy

$^1\text{H}$  NMR spectrum of S1-1 in  $\text{CDCl}_3$

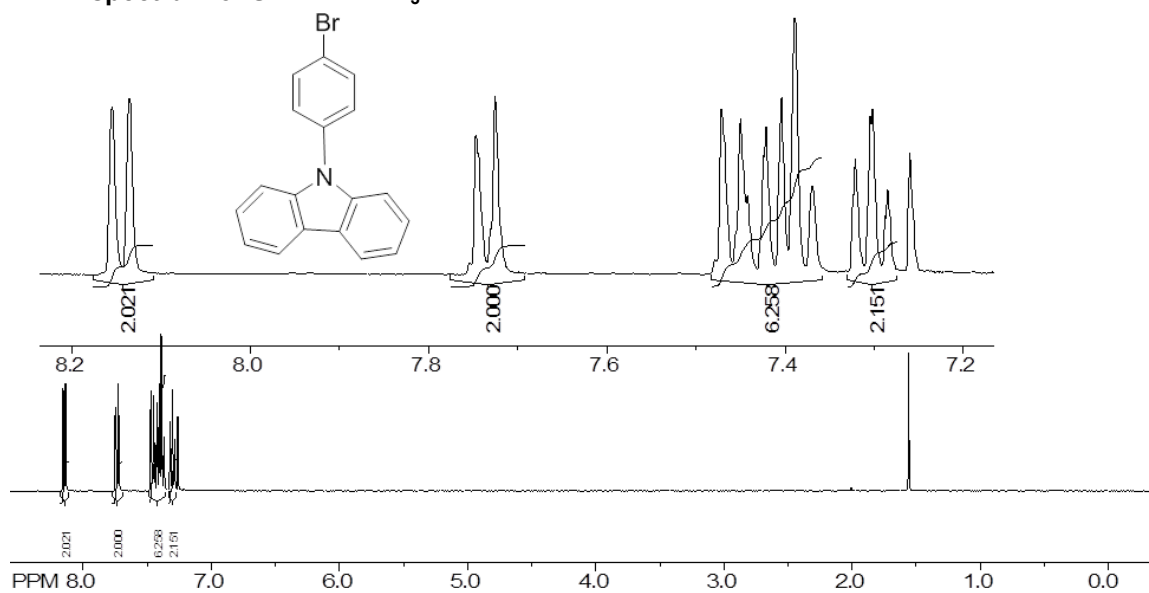

$^{13}\text{C}$  NMR spectrum of S1-1 in  $\text{CDCl}_3$

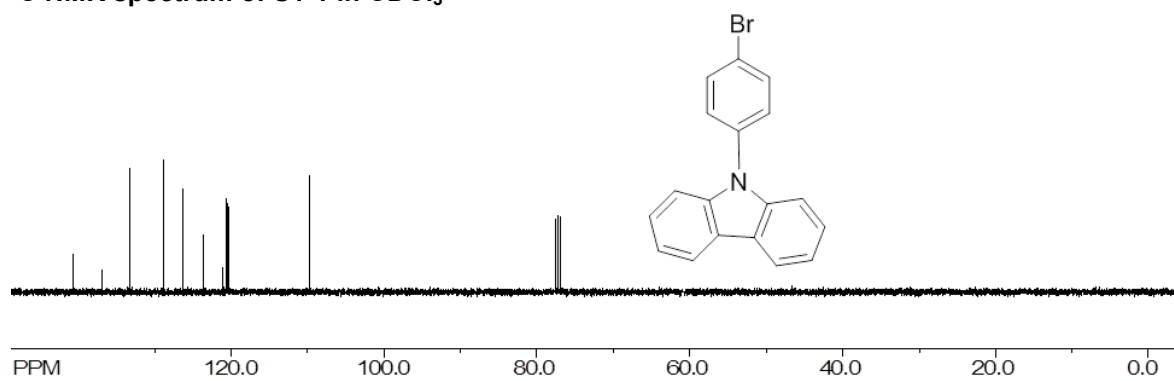

$^1\text{H}$  NMR spectrum of S1-2 (4) in  $\text{CDCl}_3$

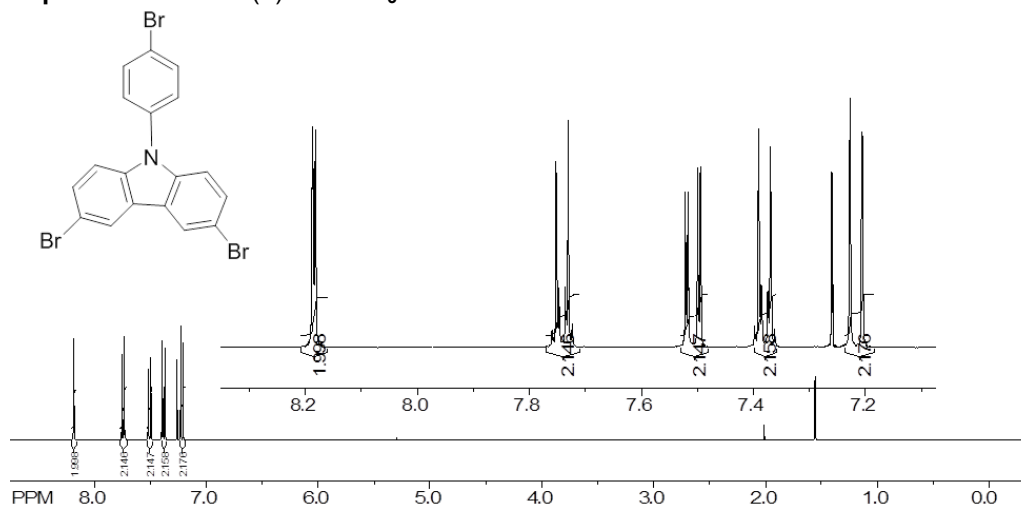



**<sup>13</sup>C NMR spectrum of S1-2 (4) in CDCl<sub>3</sub>**

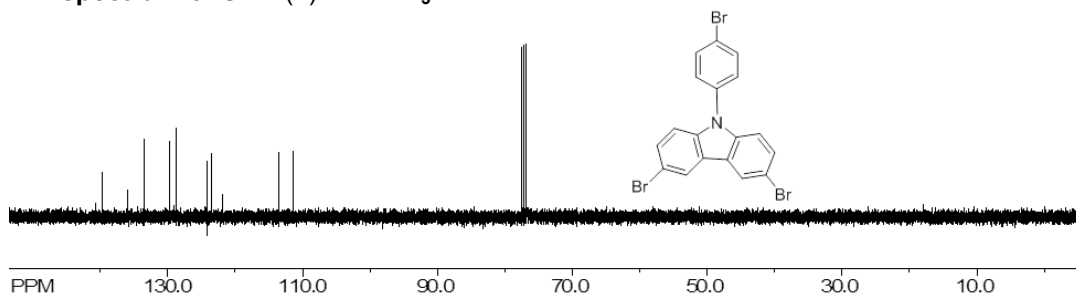

**<sup>1</sup>H NMR spectrum of S2-1 in CDCl<sub>3</sub>**

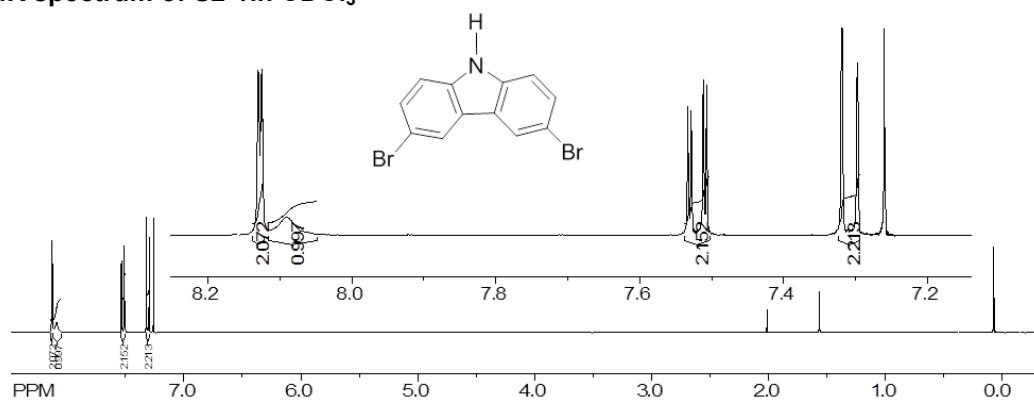

**<sup>13</sup>C NMR spectrum of S2-1 in CDCl<sub>3</sub>**

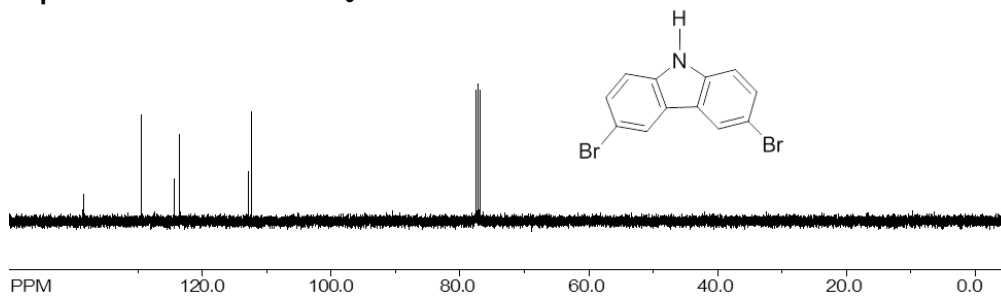

**<sup>1</sup>H NMR spectrum of S2-2 (5) in CDCl<sub>3</sub>**

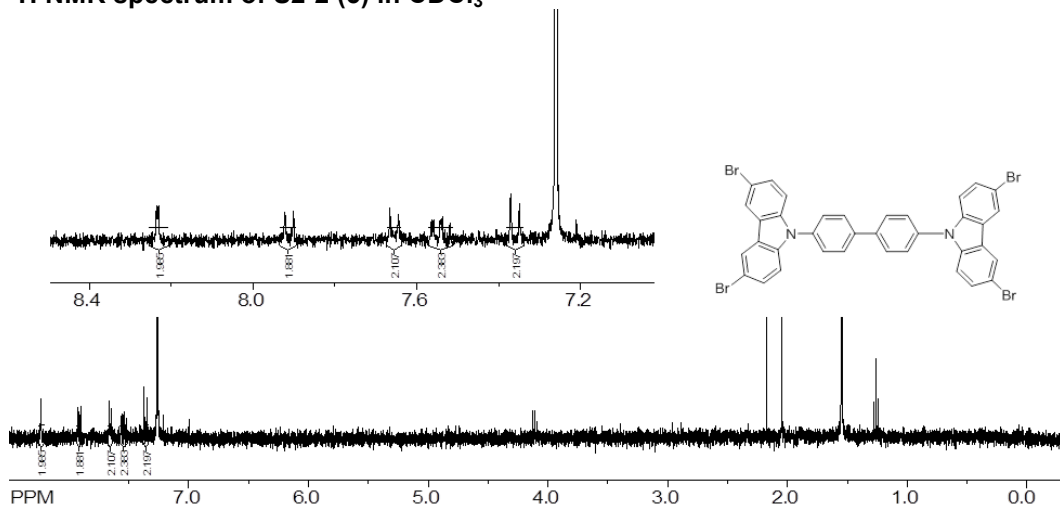

**<sup>1</sup>H NMR spectrum of compound S3-1 in CDCl<sub>3</sub>**

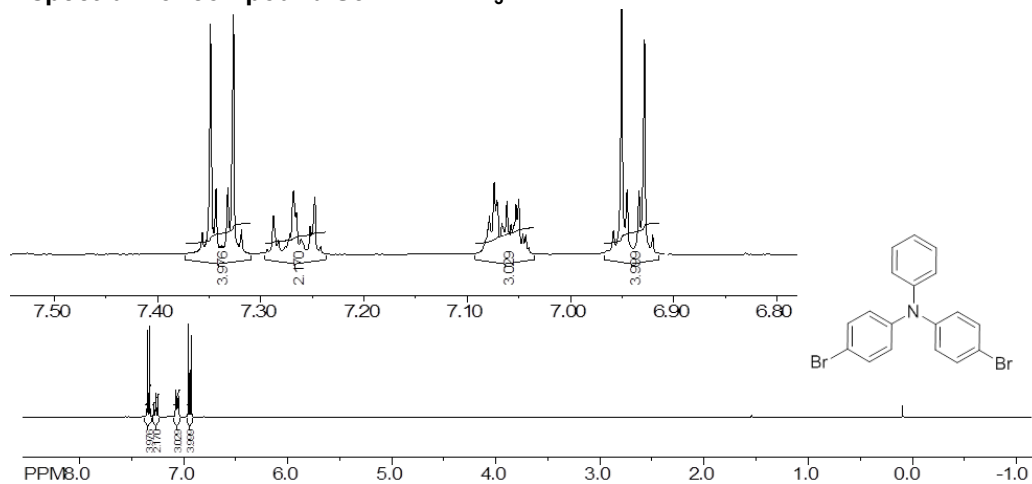

**<sup>13</sup>C NMR spectrum of S3-1 in CDCl<sub>3</sub>**

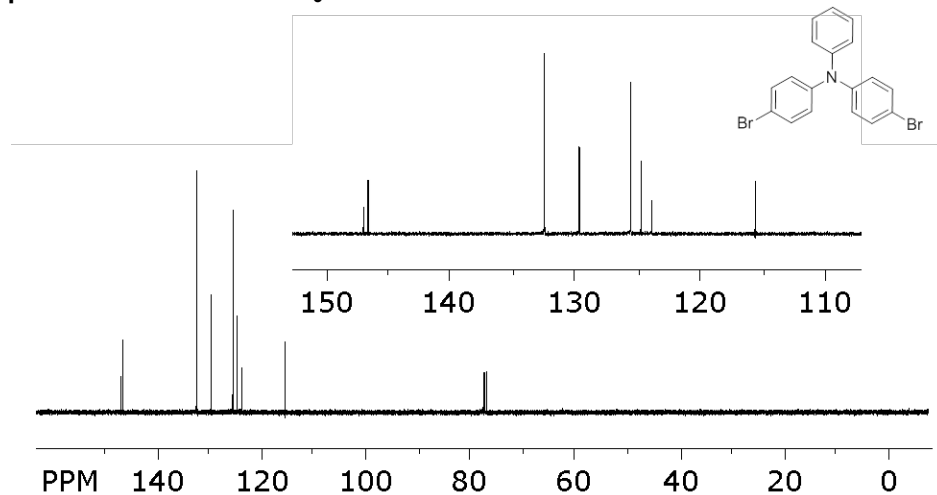

**<sup>1</sup>H NMR spectrum of S3-2 (TAB) in CDCl<sub>3</sub>**

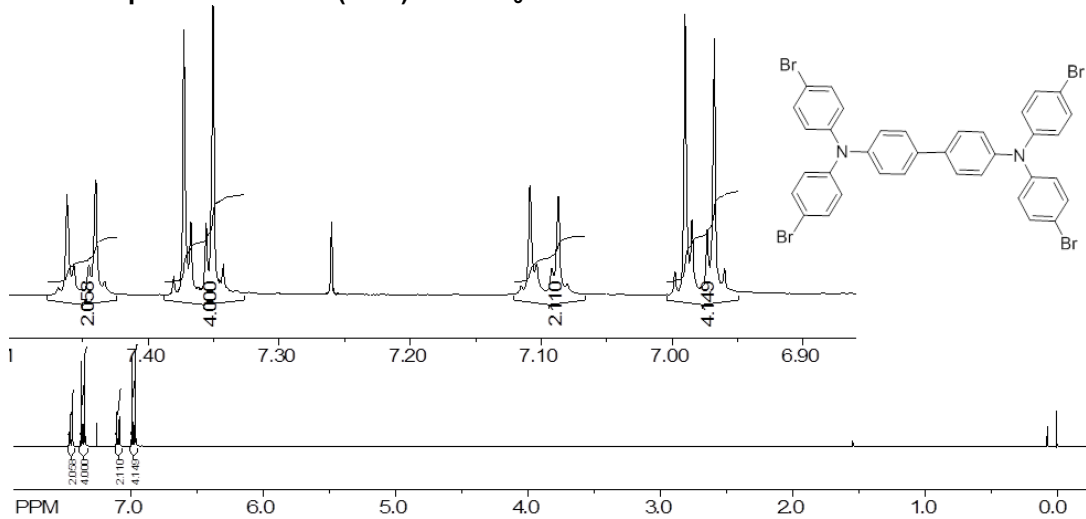

**<sup>13</sup>C NMR spectrum of S3-2 (TAB) in CDCl<sub>3</sub>**

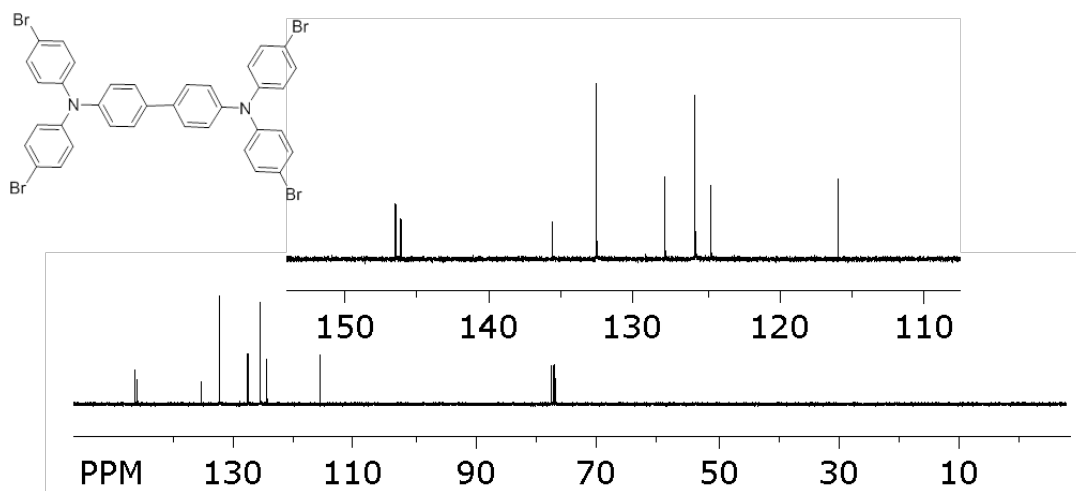

**<sup>1</sup>H NMR spectrum of S4-1 in CDCl<sub>3</sub>**

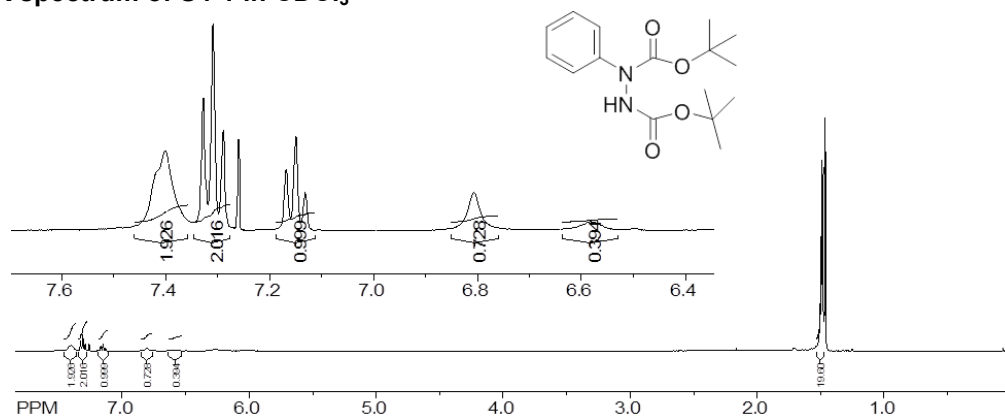

**<sup>13</sup>C NMR spectrum of S4-1 in CDCl<sub>3</sub>**

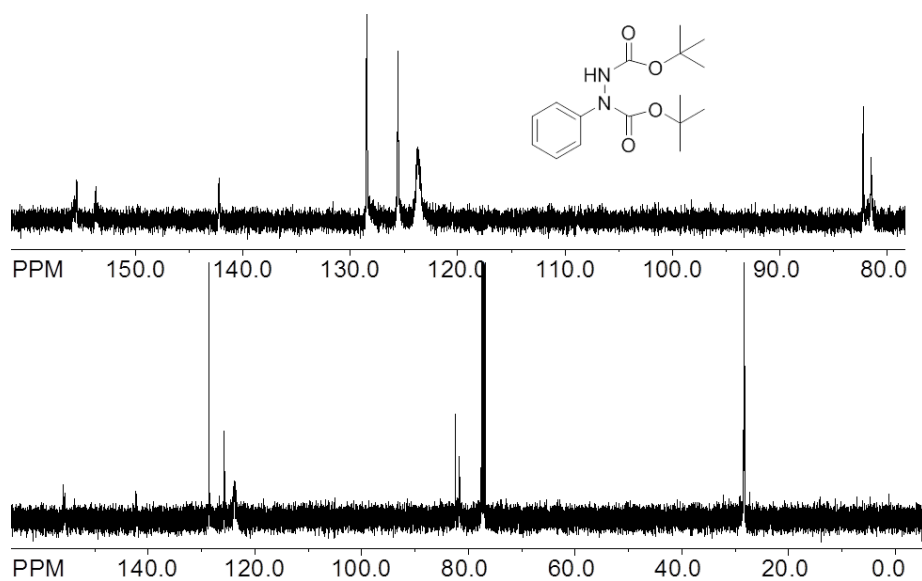

<sup>1</sup>H NMR spectrum of S4-2 in CDCl<sub>3</sub>

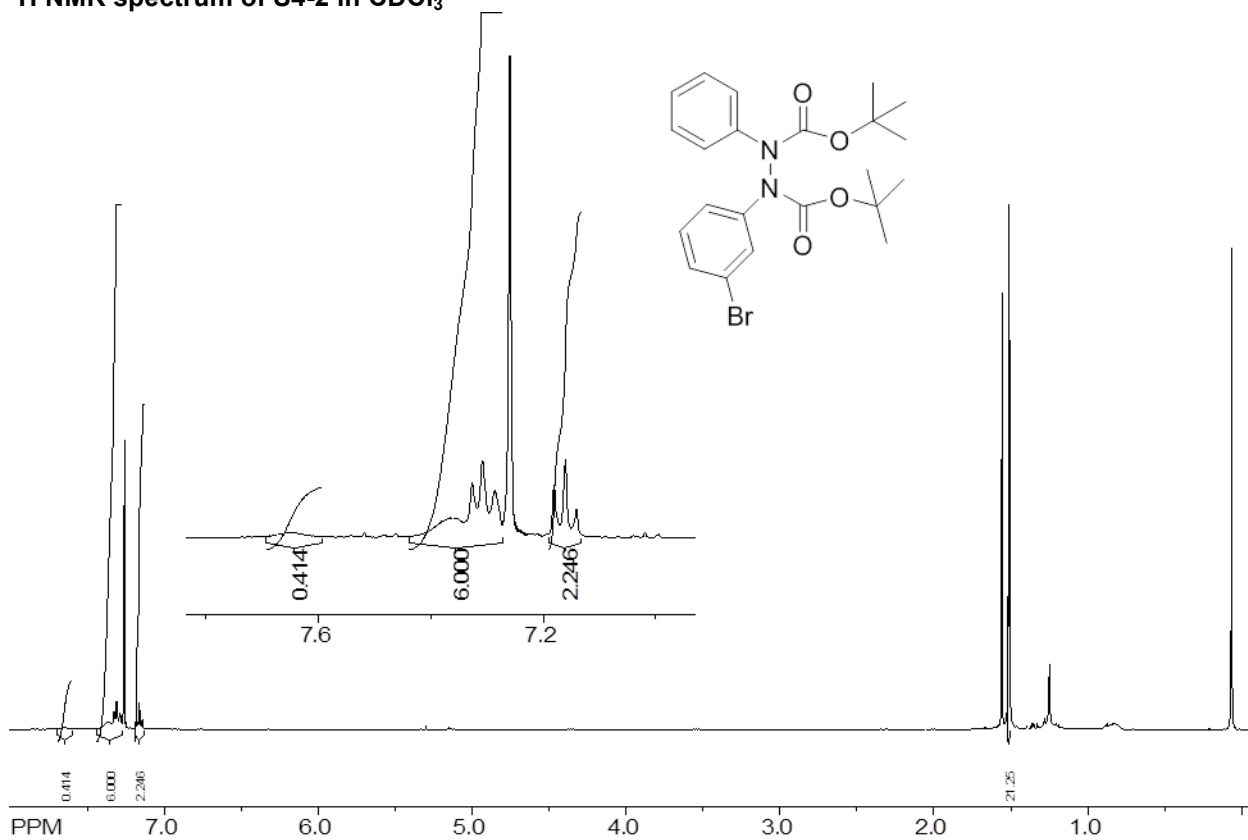

<sup>13</sup>C NMR spectrum of S4-2 in CDCl<sub>3</sub>

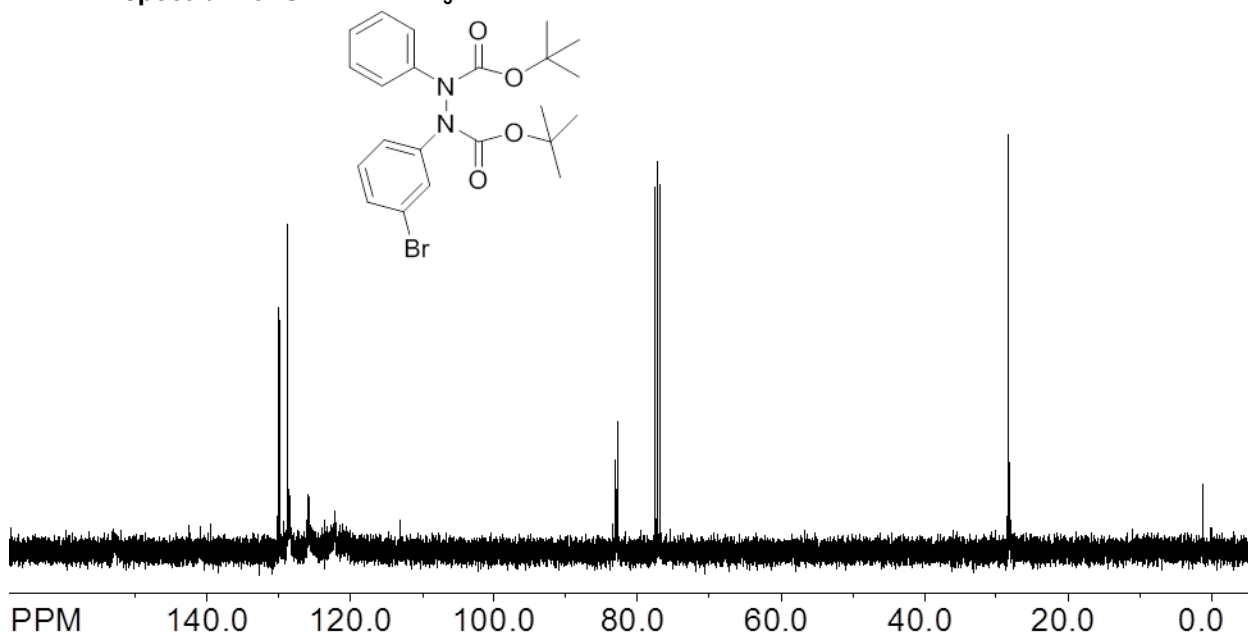

**<sup>1</sup>H NMR spectrum of S4-3 in CDCl<sub>3</sub>**

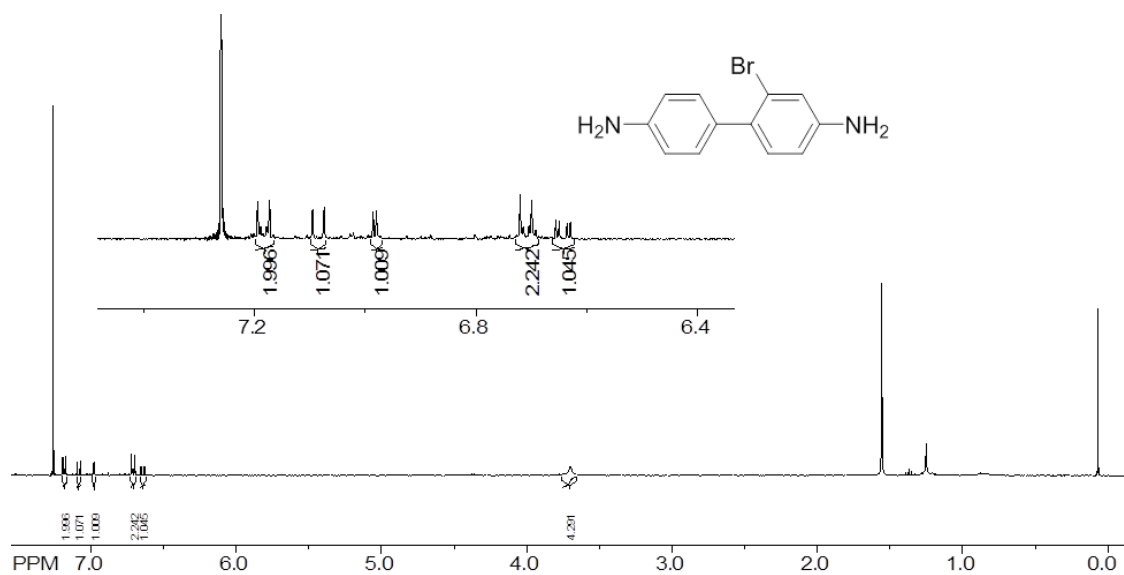

**<sup>13</sup>C NMR spectrum of S4-3 in CDCl<sub>3</sub>**

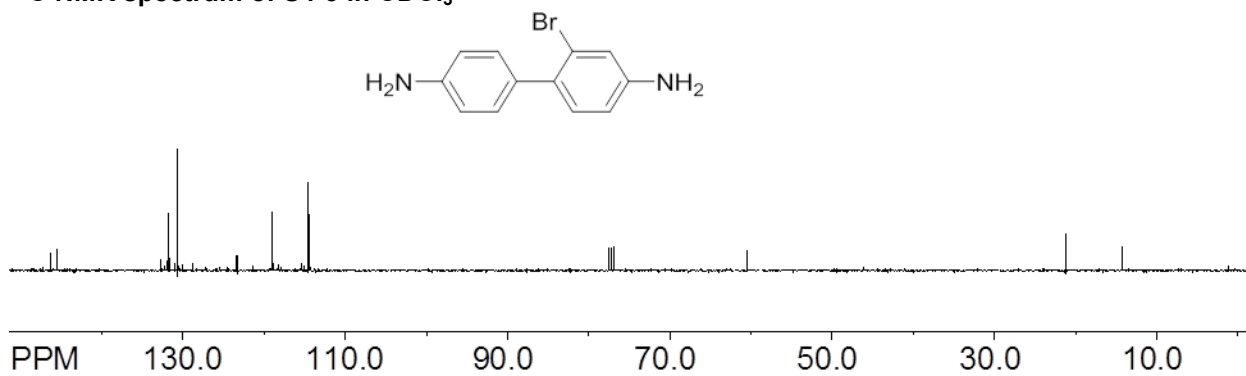

**<sup>1</sup>H NMR spectrum of S4-4 (or 6) in CDCl<sub>3</sub>**

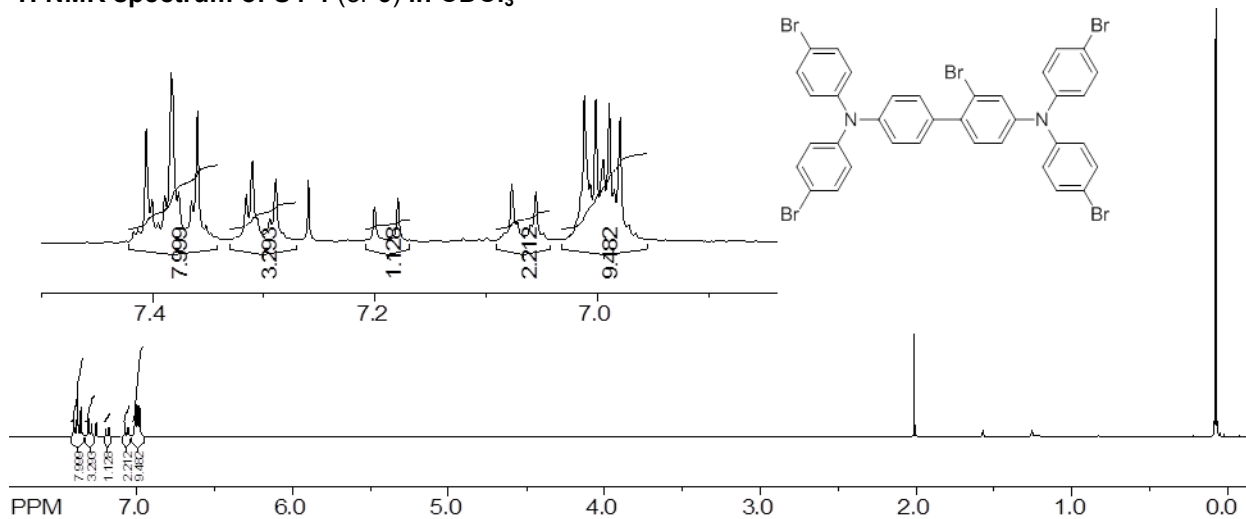

<sup>13</sup>C NMR spectrum of S4-4 (or 6) in CDCl<sub>3</sub>

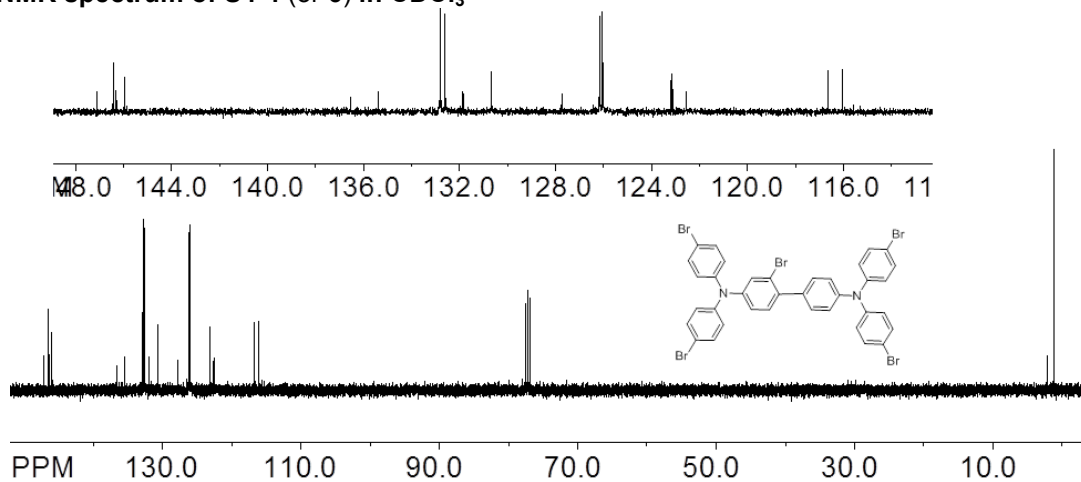

<sup>1</sup>H NMR spectrum of S5-1 in CDCl<sub>3</sub>

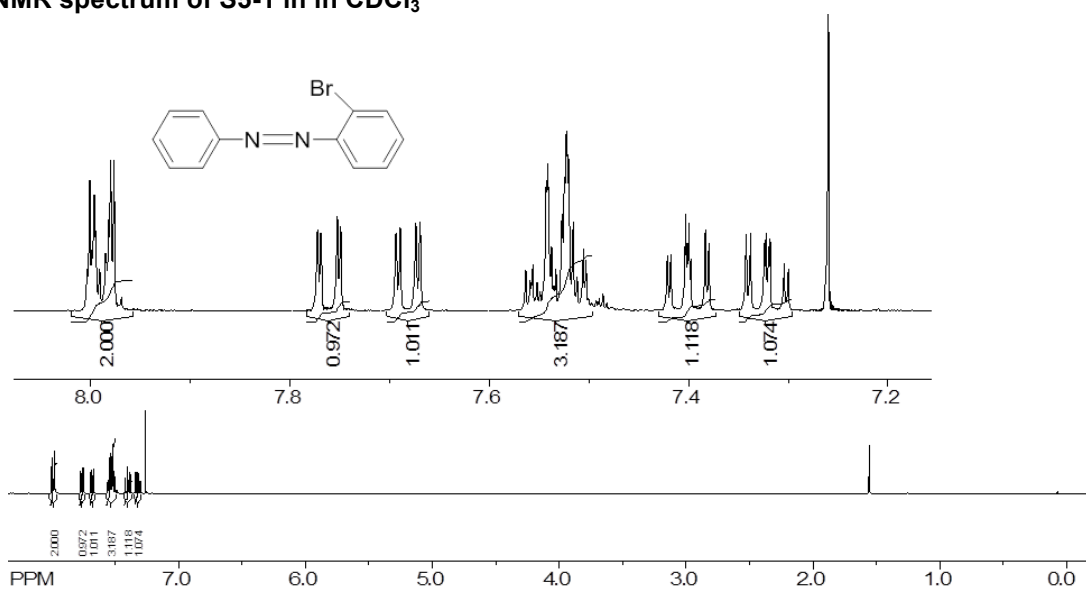

<sup>13</sup>C NMR spectrum of S5-1 in CDCl<sub>3</sub>

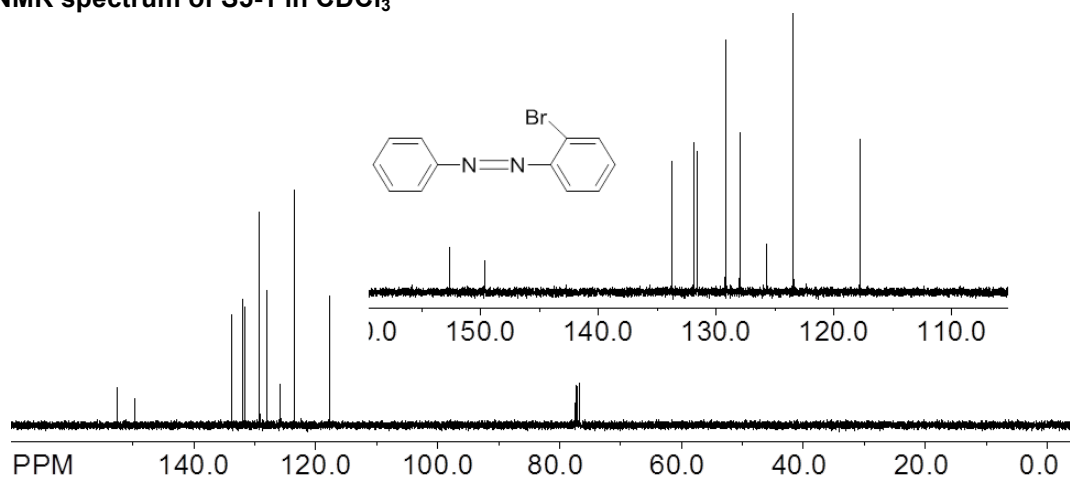

<sup>1</sup>H NMR spectrum of S5-2 in CDCl<sub>3</sub>

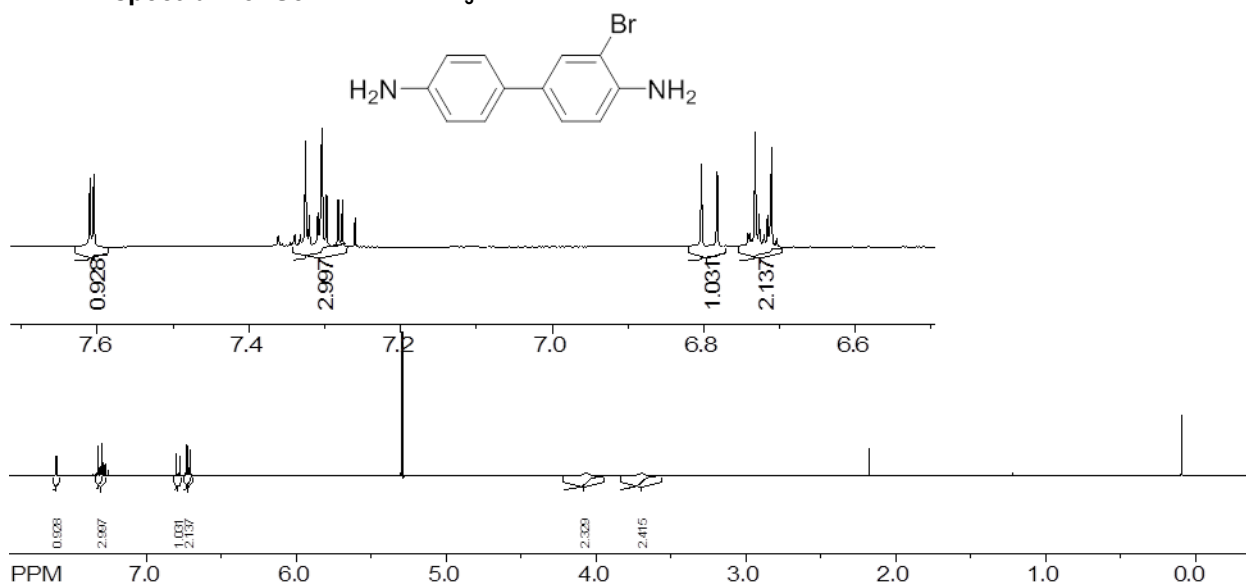

<sup>13</sup>C NMR spectrum of S5-2 in CDCl<sub>3</sub>

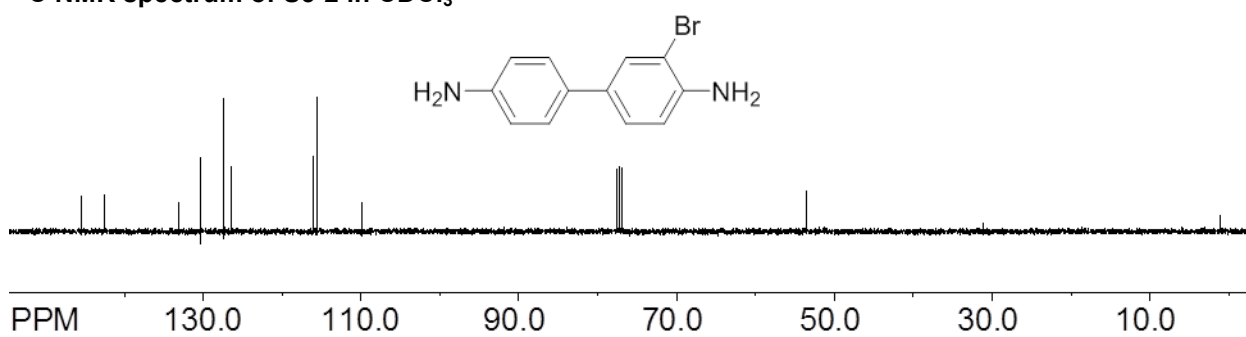

<sup>1</sup>H NMR spectrum of S5-3 in CDCl<sub>3</sub>

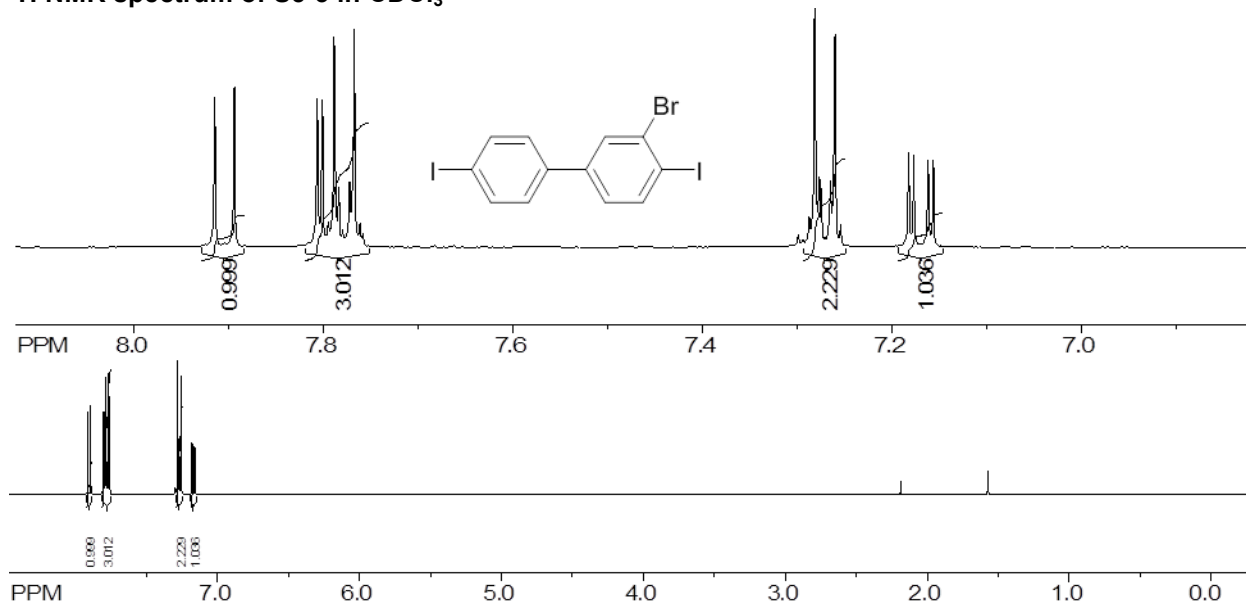

<sup>13</sup>C NMR spectrum S5-3 in CDCl<sub>3</sub>

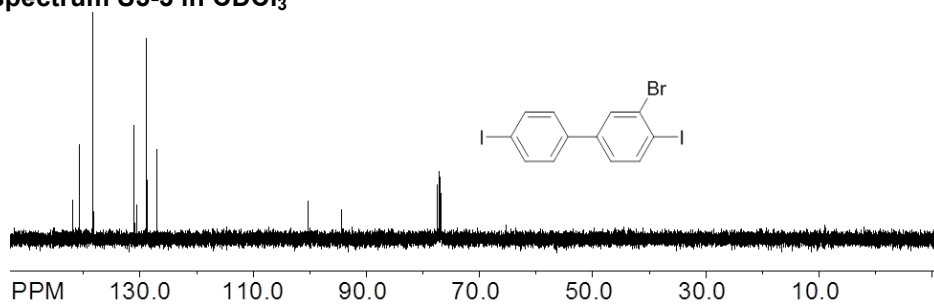

<sup>1</sup>H NMR spectrum of S5-4 in CDCl<sub>3</sub>

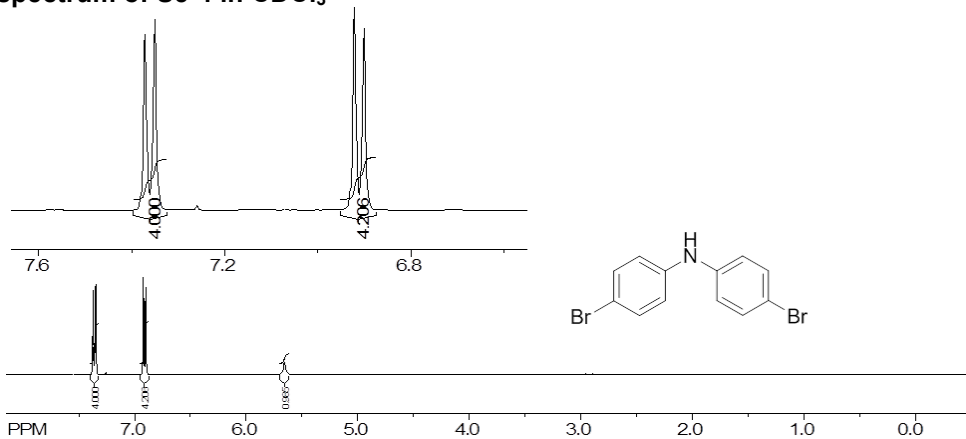

<sup>13</sup>C NMR spectrum of S5-4 in CDCl<sub>3</sub>

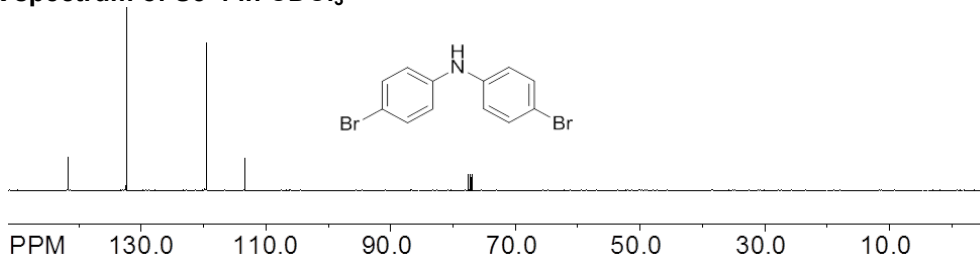

<sup>1</sup>H NMR spectrum of S5-5 (or 7) in CDCl<sub>3</sub>

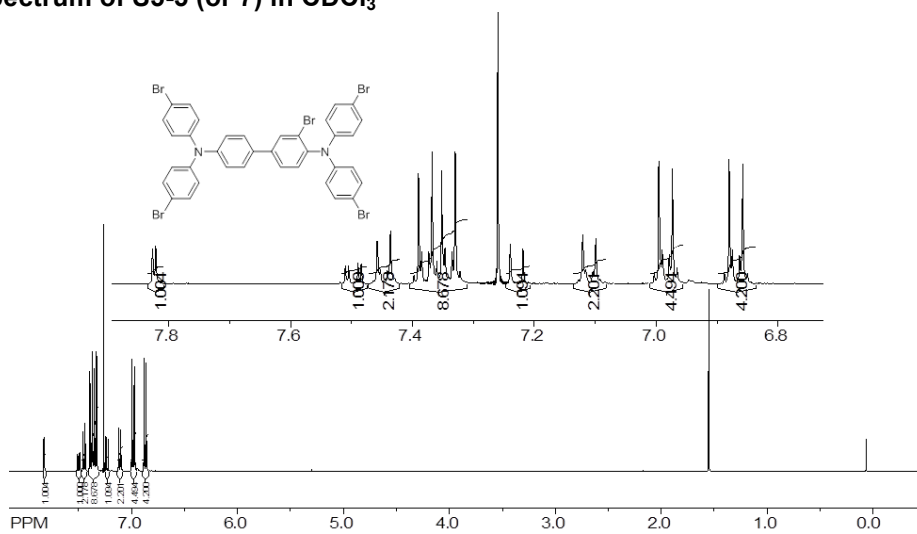



<sup>13</sup>C NMR spectrum of S5-5 (or 7) in CDCl<sub>3</sub>

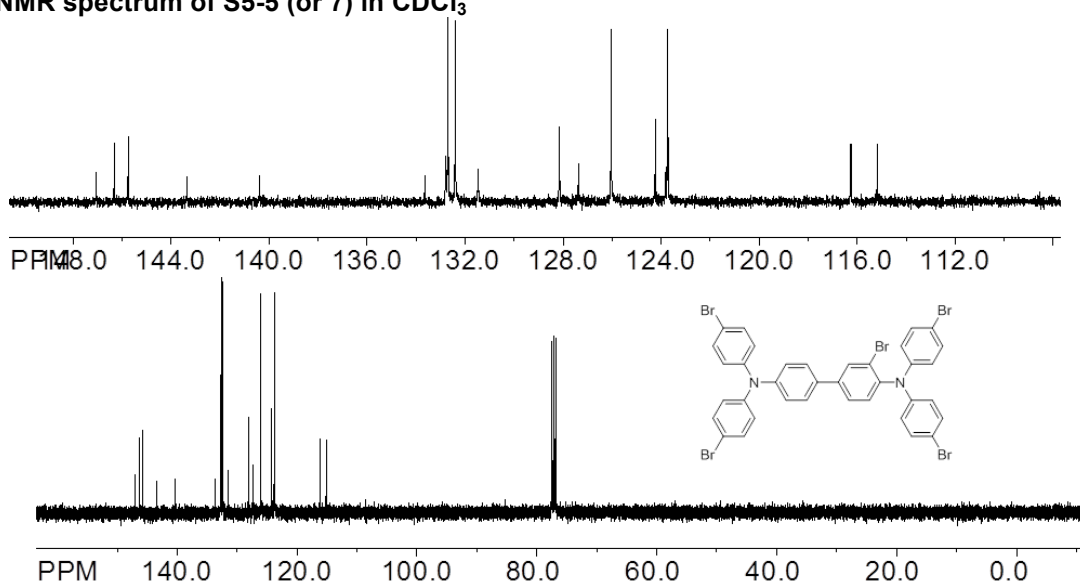

<sup>1</sup>H NMR spectrum of S6-1 in CDCl<sub>3</sub>

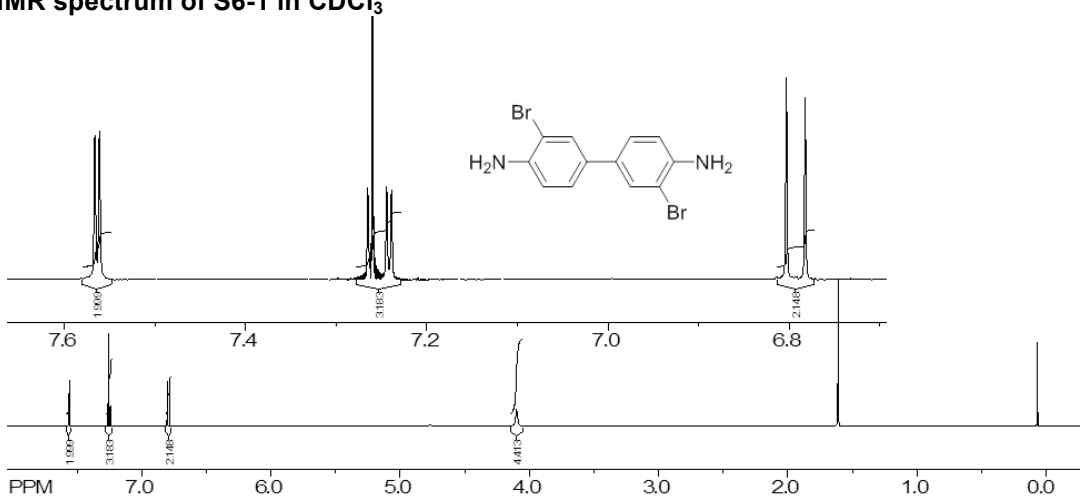

<sup>13</sup>C NMR spectrum of S6-1 in CDCl<sub>3</sub>

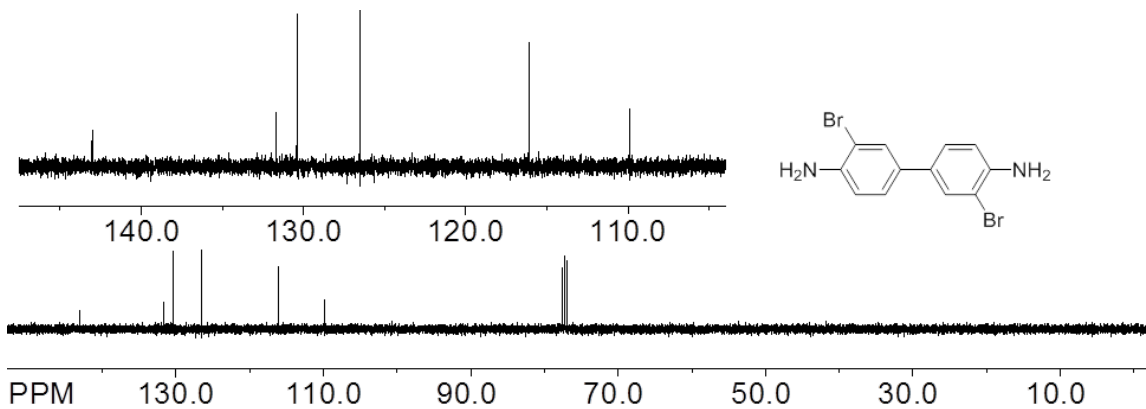

<sup>1</sup>H NMR spectrum of S6-2 in CDCl<sub>3</sub>

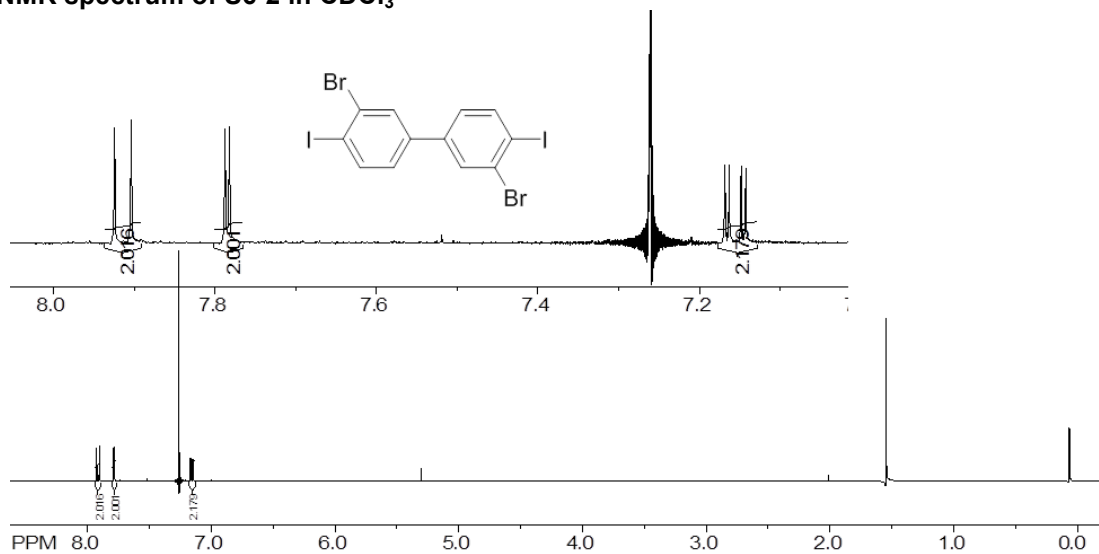

<sup>13</sup>C NMR spectrum of S6-2 in CDCl<sub>3</sub>

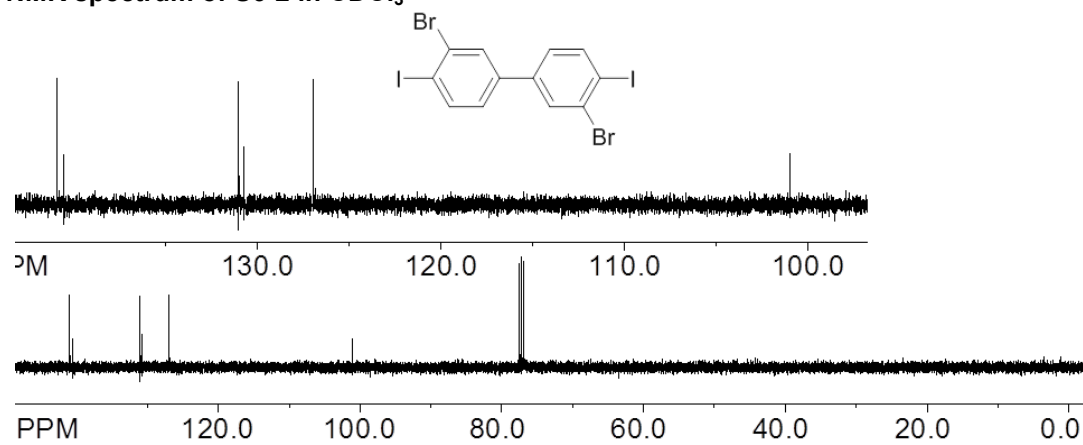

<sup>1</sup>H NMR spectrum of S6-3 (8) in CD<sub>2</sub>Cl<sub>2</sub>

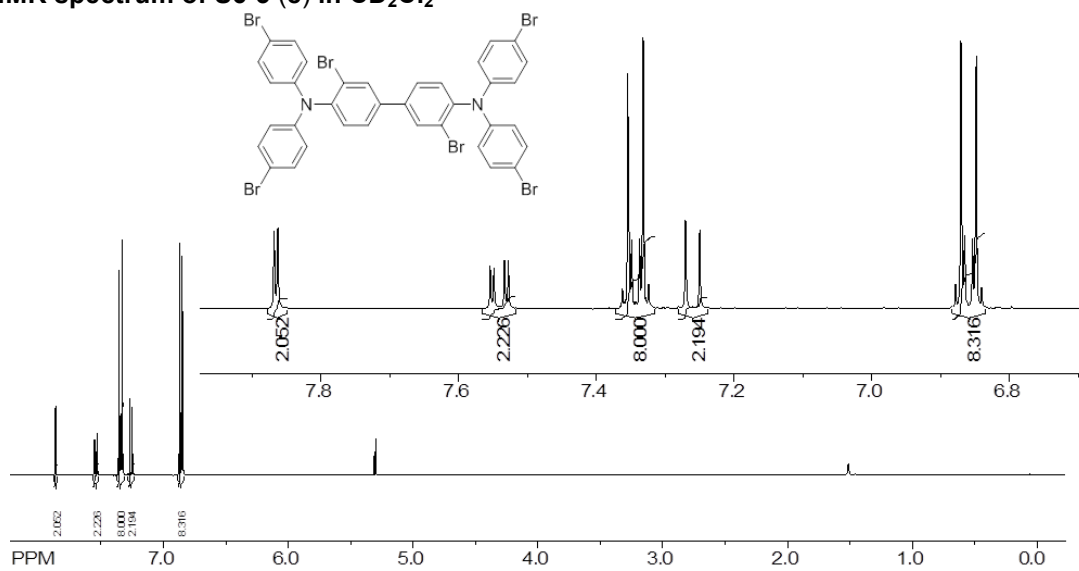

<sup>13</sup>C NMR spectrum of S6-3 (8) in CD<sub>2</sub>Cl<sub>2</sub>

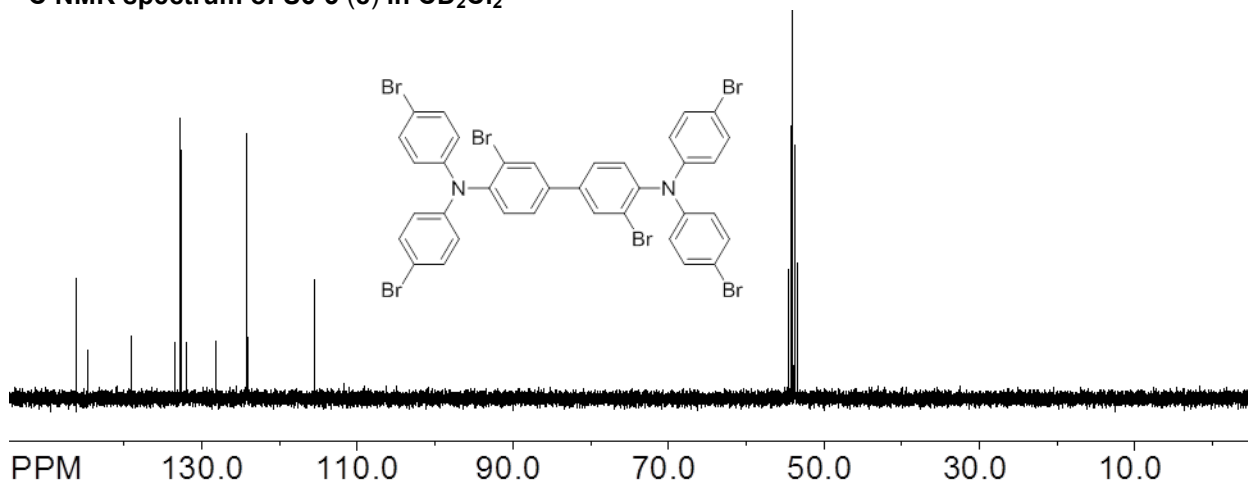

<sup>1</sup>H NMR spectrum of S7-1 in CDCl<sub>3</sub>

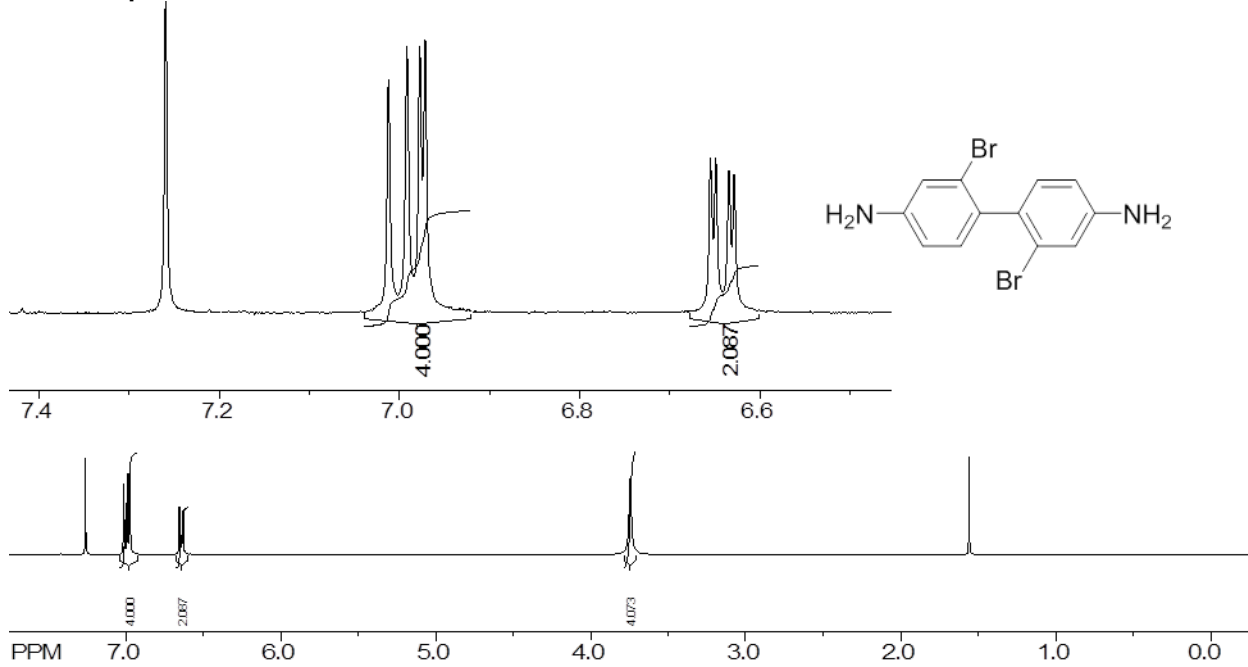

<sup>13</sup>C NMR spectrum of S7-1 in CDCl<sub>3</sub>

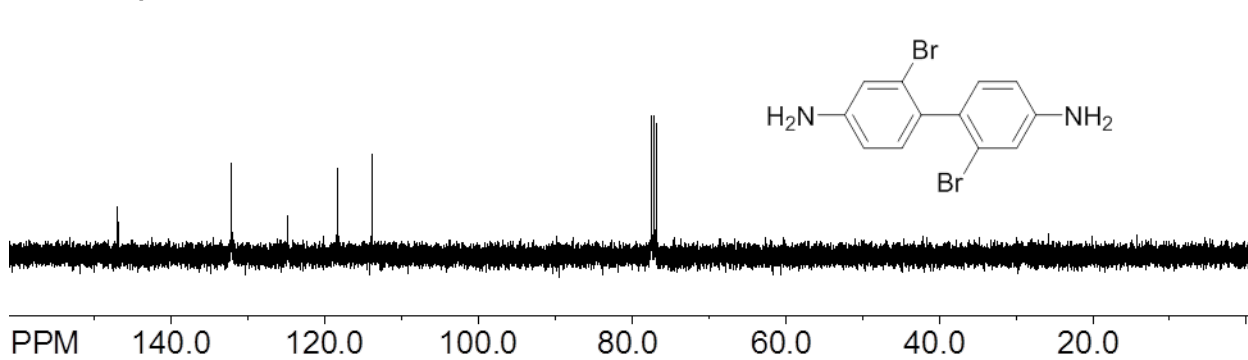

**<sup>1</sup>H NMR spectrum of S7-2 (or 9) in CDCl<sub>3</sub>**

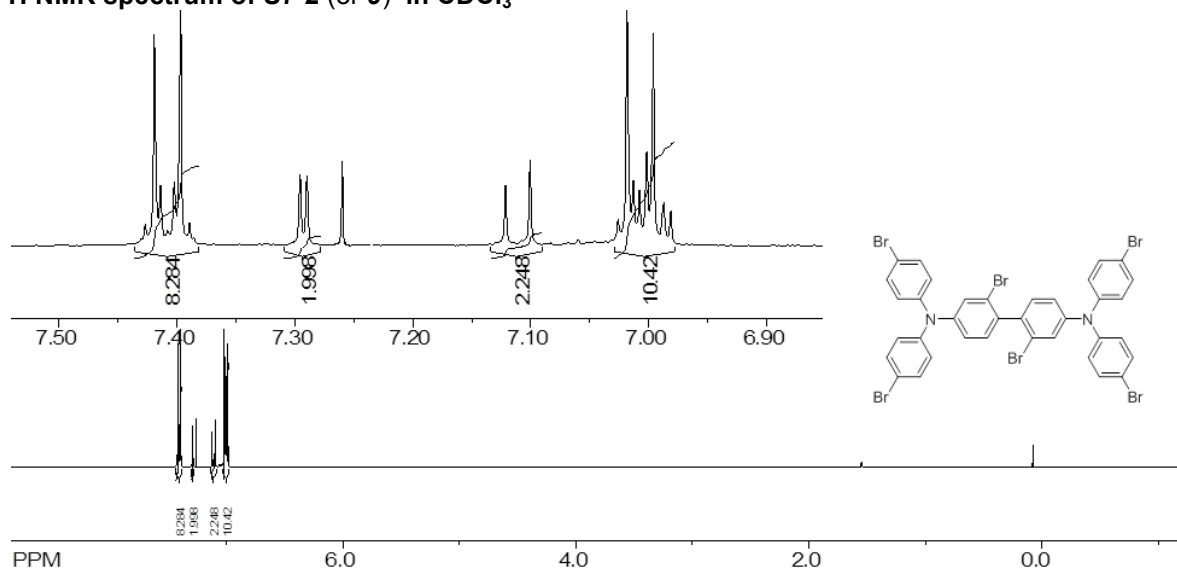

**<sup>13</sup>C NMR spectrum of S7-2 (or 9) in CDCl<sub>3</sub>**

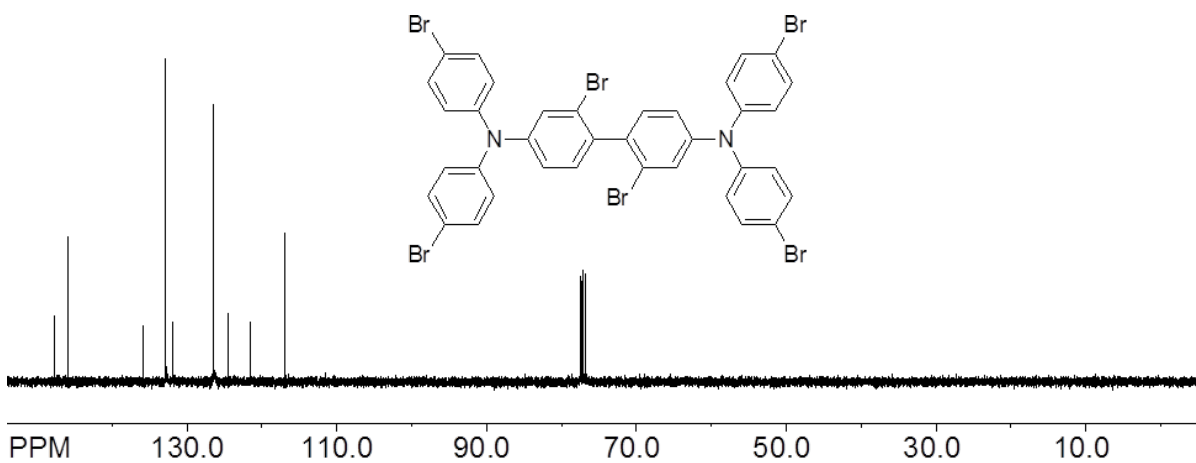

**<sup>1</sup>H NMR spectrum of S8-1 (or 10) in CDCl<sub>3</sub>**

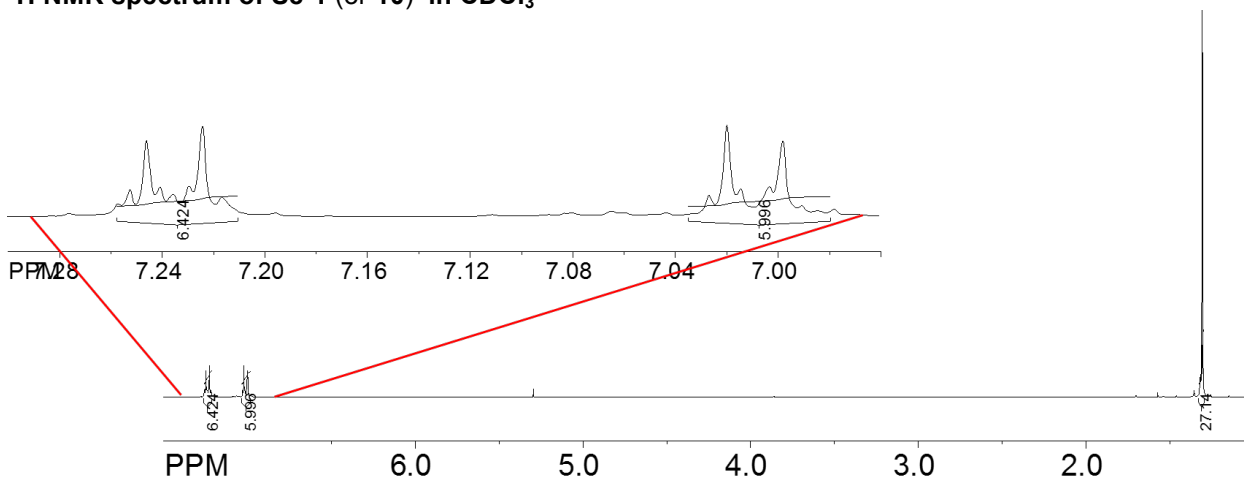

**<sup>13</sup>C NMR spectrum of S8-1 (or 10) in CDCl<sub>3</sub>**

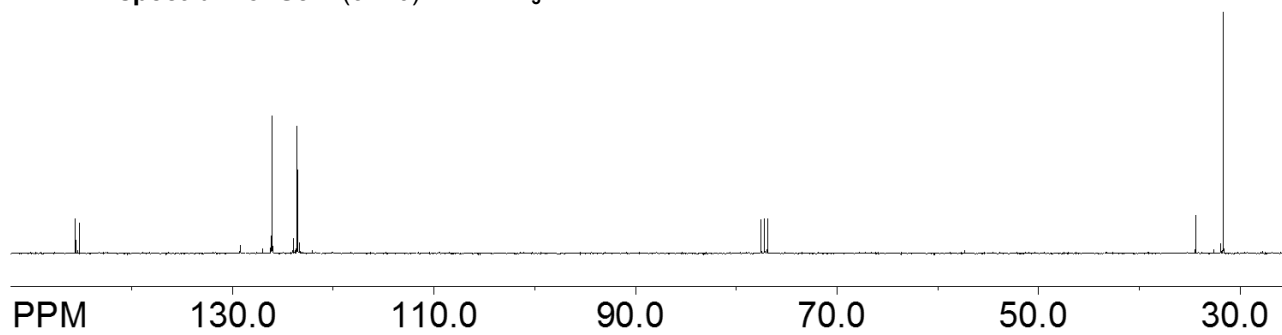

**<sup>1</sup>H NMR spectrum of S8-2 (or BC) in CDCl<sub>3</sub>**

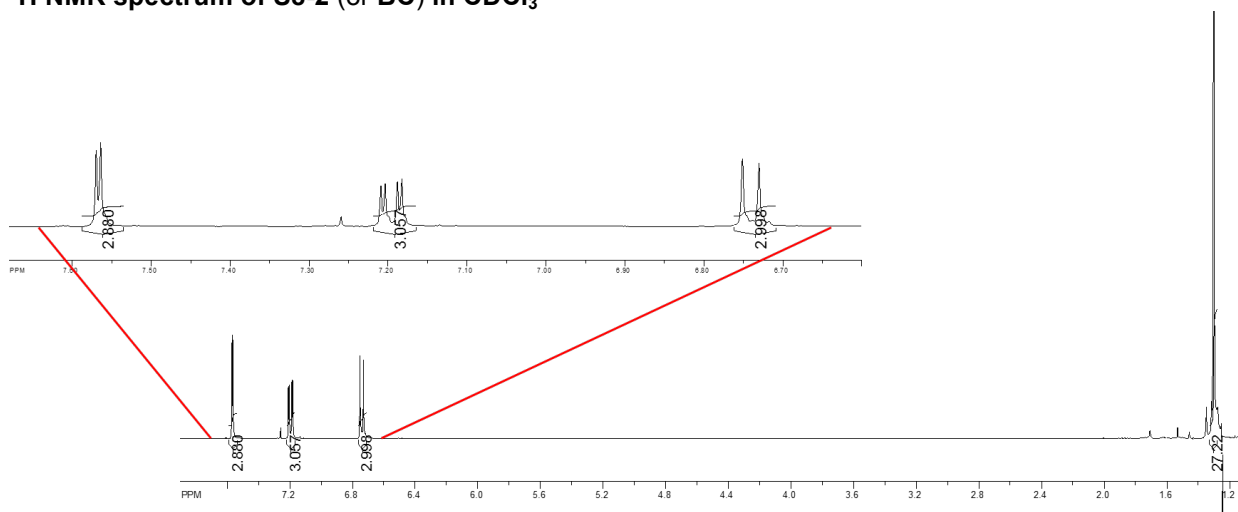

**<sup>13</sup>C NMR spectrum of S8-2 (or BC) in CDCl<sub>3</sub>**

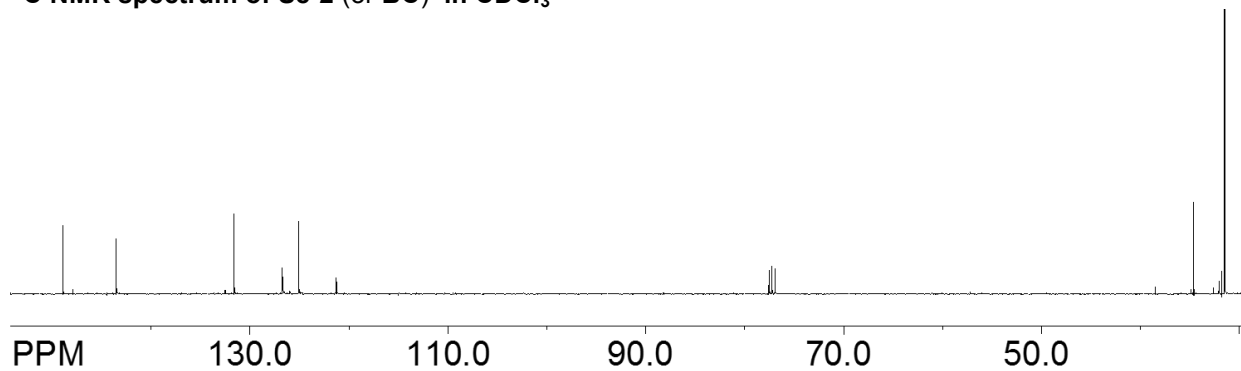

## S10. References

- 1 Frisch, M. J.; Trucks, G. W.; Schlegel, H. B.; Scuseria, G. E.; Robb, M. A.; Cheeseman, J. R.; Scalmani, G.; Barone, V.; Mennucci, B.; Petersson, G. A.; Nakatsuji, H.; Caricato, M.; Li, X.; Hratchian, H. P.; Izmaylov, A. F.; Bloino, J.; Zheng, G.; Sonnenberg, J. L.; Hada, M.; Ehara, M.; Toyota, K.; Fukuda, R.; Hasegawa, J.; Ishida, M.; Nakajima, T.; Honda, Y.; Kitao, O.; Nakai, H.; Vreven, T.; Montgomery, J. A.; Peralta, J. E.; Ogliaro, F.; Bearpark, M.; Heyd, J. J.; Brothers, E.; Kudin, K. N.; Staroverov, V. N.; Kobayashi, R.; Normand, J.; Raghavachari, K.; Rendell, A.; Burant, J. C.; Iyengar, S. S.; Tomasi, J.; Cossi, M.; Rega, N.; Millam, J. M.; Klene, M.; Knox, J. E.; Cross, J. B.; Bakken, V.; Adamo, C.; Jaramillo, J.; Gomperts, R.; Stratmann, R. E.; Yazyev, O.; Austin, A. J.; Cammi, R.; Pomelli, C.; Ochterski, J. W.; Martin, R. L.; Morokuma, K.; Zakrzewski, V. G.; Voth, G. A.; Salvador, P.; Dannenberg, J. J.; Dapprich, S.; Daniels, A. D.; Farkas; Foresman, J. B.; Ortiz, J. V.; Cioslowski, J.; Fox, D. J. Gaussian, Inc., Wallingford CT, 2009
- 2 M. R. Talipov, A. Boddada, Q. K. Timerghazin and R. Rathore, *J. Phys. Chem. C*, 2014, **118**, 21400-21408.
- 3 C. Adamo and V. Barone, *Chem. Phys. Lett.*, 1997, **274**, 242-250.
- 4 W. J. Hehre, R. Ditchfield and J. A. Pople, *J. Chem. Phys.*, 1972, **56**, 2257-2261.
- 5 A. J. Cohen, P. Mori-Sánchez and W. Yang, *Science*, 2008, **321**, 792-794.
- 6 A. J. Cohen, P. Mori-Sánchez and W. Yang, *Chem. Rev.*, 2011, **112**, 289-320.
- 7 S. Miertus, E. Scrocco and J. Tomasi, *Chem. Phys.*, 1981, **55**, 117.
- 8 M. T. Cancès, V. Mennucci and J. Tomasi, *J. Chem. Phys.*, 1997, **107**, 3032-3041.
- 9 M. Cossi, V. Barone, V. Mennucci and J. Tomasi, *Chem. Phys. Lett.*, 1998, **286**, 253-260.
- 10 J. Tomasi, B. Mennucci and R. Cammi, *Chem. Rev.*, 2005, **105**, 2999-3093.
- 11 R. F. Ribeiro, A. V. Marenich, C. J. Cramer and D. G. Truhlar, *J. Phys. Chem. B*, 2011, **115**, 14556-14562.
- 12 R. Seeger and J. A. Pople, *J. Chem. Phys.*, 1977, **66**, 3045-3050.
- 13 R. Bauernschmitt and R. Ahlrichs, *J. Chem. Phys.*, 1996, **104**, 9047-9052.
- 14 R. E. Stratmann, G. E. Scuseria and M. J. Frisch, *J. Chem. Phys.*, 1998, **109**, 8218-8224.
- 15 M. E. Casida, C. Jamorski, K. C. Casida and D. R. Salahub, *J. Chem. Phys.*, 1998, **108**, 4439-4449.
- 16 R. Cammi, B. Mennucci and J. Tomasi, *J. Phys. Chem. A*, 2000, **104**, 5631-5637.
- 17 M. Cossi and V. Barone, *J. Chem. Phys.*, 2001, **115**, 4708-4717.
- 18 W. S. E. Steckhan and W. Schmidt, *Chem. Ber.*, 1980, **113**, 577-585.
- 19 J. Vicente, J. Gil-Rubio, G. Zhou, H. J. Bolink and J. Arias-Pardilla, *J. Polym. Sci. A Polym. Chem.*, 2010, **48**, 3744-3757.
- 20 H. -F. Huang, S. -H. Xu, Y. -B. He, C. -C. Zhu, H. -L. Fan, X. -H. Zhou, X. -C. Gao and Y. -F. Dai, *Dyes Pigments*, 2013, **96**, 705-713.
- 21 N. Berton, I. Fabre-Francke, D. Bourrat, F. Chandezon and S. Sadki, *J. Phys. Chem. B*, 2009, **113**, 14087-14093.
- 22 S. Wu, Y. Liu, G. Yu, J. Guan, C. Pan, Y. Du, X. Xiong and Z. Wang, *Macromolecules*, 2014, **47**, 2875-2882.
- 23 J. H. Cho, Y. -S. Ryu, S. H. Oh, J. K. Kwon and E. K. Yum, *Bull. Korean. Chem. Soc.*, 2011, **32**, 2461.
- 24 J. Safaei-Ghomi and Z. Akbarzadeh, *Ultrason. Sonochem.*, 2015, **22**, 365-370.
- 25 L. Ebersson and B. Larsson, *Acta. Chem. Scand.*, 1986, **40**, 210-225.
- 26 L. Zhai, R. Shukla, S. H. Wadumethrige and R. Rathore, *J. Org. Chem.*, 2010, **75**, 4748-4760.
- 27 B.-Y. Lim, B.-E. Jung and C.-G. Cho, *Org. Lett.*, 2014, **16**, 4492-4495.
- 28 H.-M. Kang, Y.-K. Lim, I.-J. Shin, H.-Y. Kim and C.-G. Cho, *Org. Lett.*, 2006, **8**, 2047-2050.
- 29 R. Belcher, A. J. Nutten and W. I. Stephen, *J. Chem. Soc.*, 1958, 2336-2338.
- 30 B. S. Furniss, Vogel's textbook of practical organic chemistry, Pearson Education India, 1989.
- 31 M. Wang, C. Li, A. Lv, Z. Wang, Z. Bo and F. Zhang, *Polymer*, 2012, **53**, 324-332.
- 32 M. M. Chen, A. F. D'Adamo Jr and R. I. Walter, *J. Org. Chem.*, 1961, **26**, 2721-2727.
- 33 S. I. Thomas and D. E. Falvey, *J. Org. Chem.*, 2007, **72**, 4626-4634.
- 34 H. R. Snyder, C. Weaver and C. D. Marshall, *J. Am. Chem. Soc.*, 1949, **71**, 289-291.
- 35 J. Cornforth, R. H. Cornforth and R. T. Gray, *J. Chem. Soc. Perk. T. 1*, 1982, 2289-2297.
- 36 D. Vak, J. Jo, J. Ghim, C. Chun, B. Lim, A. J. Heeger and D. -Y. Kim, *Macromolecules*, 2006, **39**, 6433-6439.
- 37 X. Huang and S. L. Buchwald, *Org. Lett.*, 2001, **3**, 3417-3419.

## S11. Archive entries from the calculation files

The archive entries, formerly intended for the Browse Quantum Chemistry Database System, are organized as a simple list of data fields separated by backslash symbols, which is wrapped in 70-char text lines. The script 'Parse.Archive.pl', written in Perl, converts archive entry into human readable format. To use this script,

1. Check if Perl interpreter is installed on the system. To do this, run the command 'perl -v' in console. If console returns a message like 'command not found', please obtain and install a Perl interpreter ([www.perl.org/get.html](http://www.perl.org/get.html)); Perl is Open Source software licensed under GNU GPL).
2. Save the script code, listed below, as a file named 'Parse.Archive.pl'.
3. Select an archive entry of interest and save it as another file (e.g. 'A.txt').
4. Run the command 'perl Parse.Archive.pl A.txt > A-parsed.txt' in console. The parsed archive entry will be stored in the file 'A-parsed.txt' in this example. In some cases, absolute path to the Perl interpreter might need to be provided.

```
# --- Parse.Archive.pl ---

# Merge all strings in one line
my $s='';
while(<>) {chomp;$s .= $_}
$_ = $s;

# Some PDF viewers (like Mac OS's Preview) might substitute
# 'end of line' symbols by the white space symbols,
# To remove these extra white spaces, please uncomment the following lines:
# my $str_length = 70;
# my $index = $str_length;
# while (length($_) > $index) {
#     substr $_,$index,1,'';
#     $index += $str_length;
# }

# Replace all backslashes by new-line symbols
s:\\:\\n:g;

# Print the resulting output
print;

# --- END ---
```

MB

```
1\1\GINC-HPC-CN7\F0pt\RBLYP\6-31G(d)\C18H12Br3N1\TALIPOVM\04-Jun-2014\
0\#\#P BLYP IOP(3/76=0600004000)/6-31G(d) Opt(tight) SCRf(PCM,solvent=D
ichloromethane) nosym scf(fermi,xqc,maxcyc=200) int(grid=ultrafine)\T
itle\0,1\N,0.0115528758,-0.0010145897,-0.0001024466\C,1.4256920252,0.
0267120586,-0.0026685848\C,2.1194968028,0.9315850886,0.8044014356\H,1.
5729887648,1.6216211651,1.4290328632\C,3.506217864,0.9547842209,0.8110
965618\H,4.0327543495,1.657782716,1.437589262\C,4.2065785721,0.0813969
927,-0.0076661468\Br,6.1113239071,0.1189245259,-0.0111673442\C,3.53812
43716,-0.8189228946,-0.8239377785\H,4.0896572945,-1.5007245775,-1.4523
431019\C,2.1515930094,-0.850292918,-0.8122855431\H,1.6303959474,-1.561
2999951,-1.4350386651\C,-0.6956589447,0.1046527759,1.2203467174\C,-0.2
652853884,-0.5909869572,2.352744952\H,0.6088970992,-1.2214527222,2.294
```

9271125\C, -0.9510902316, -0.4817645962, 3.5532957192\H, -0.611037675, -1.0233957922, 4.4221836253\C, -2.0860040024, 0.3127302264, 3.620181214\Br, -3.038367649, 0.4553059802, 5.2640256348\C, -2.5365974515, 1.0047576947, 2.5058495933\H, -3.4157333075, 1.6270748492, 2.5674210274\C, -1.8358233076, 0.9064598999, 1.3130294528\H, -2.1760767608, 1.4570483147, 0.4492603121\C, -0.6956751801, -0.1330869253, -1.2179153739\C, -1.8057254933, -0.9765912438, -1.306214057\H, -2.1220514117, -1.5392434702, -0.4411288463\C, -2.5069739002, -1.1009613064, -2.496310897\H, -3.3627263475, -1.7553773988, -2.5544700517\C, -2.0866155878, -0.3929336285, -3.6124122539\Br, -3.0394157169, -0.5709555917, -5.2525674154\C, -0.9816497776, 0.4430377142, -3.5499102418\H, -0.6651979798, 0.9967399672, -4.4201020198\C, -0.2957402334, 0.5778100301, -2.352014258\H, 0.5546434634, 1.2403103871, -2.2976504576\\Version=EM64L-G09R evD.01\HF=-8462.4490704\RMSD=8.123e-09\RMSF=4.375e-07\Dipole=-0.0016899, -0.0005459, 0.0010473\Quadrupole=-4.9656594, 9.7592781, -4.7936187, -0.2906756, 0.0179583, -1.4390679\PG=C01 [X(C18H12Br3N1)]\@\

TAB

1\1\GINC-HPC-CN18\FOpt\RBLYP\6-31G(d)\C36H24Br4N2\ TALIPOVM\07-Jan-2015  
\0\#\#P BLYP IOP(3/76=0600004000)/6-31G(d) Opt(tight) SCRF(PCM,solvent=Dichloromethane) nosym scf(fermi,xqc,maxcyc=200) int(grid=ultrafine)\  
Title\0,1\N, -8.840418006, -0.1734112645, -1.2900032256\C, -7.4277943594, -0.1924462384, -1.1779824526\C, -6.7726278445, 0.6536663302, -0.2813650471\H, -7.3471362064, 1.3411382606, 0.321406242\C, -5.3920709301, 0.6260538767, -0.1697793844\H, -4.9113052639, 1.3101533425, 0.5145843157\C, -4.6128931236, -0.230308875, -0.9553638155\C, -5.2815292004, -1.0671751617, -1.8554438835\H, -4.7175980055, -1.7651621619, -2.4573042771\C, -6.6626843848, -1.0576697499, -1.9622731803\H, -7.1534693934, -1.7307263256, -2.6494048521\C, -9.6388841089, -0.134919761, -0.1249510998\C, -9.302729114, -0.9048316248, 0.9917599004\H, -8.4319560946, -1.5416878732, 0.9607377371\C, -10.0770192718, -0.86118627, 2.1414832405\H, -9.8087661107, -1.4605427886, 2.9975621249\C, -11.2064053453, -0.056756563, 2.1732472047\Br, -12.2796240911, -0.003266623, 3.7468871015\C, -11.564035551, 0.7095889194, 1.0739757888\H, -12.4391299737, 1.3397236413, 1.1082816082\C, -10.775725129, 0.6757922271, -0.0665297007\H, -11.0446283092, 1.2846305785, -0.9161952523\C, -9.4455192715, -0.1925865664, -2.566747406\C, -10.5786212772, -0.9745089884, -2.8068728947\H, -10.9936210847, -1.5757616711, -2.0123869408\C, -11.177052987, -0.9892999665, -4.0578818847\H, -12.051096341, -1.5972897803, -4.2323648567\C, -10.6309656756, -0.2329511168, -5.0841951972\Br, -11.4427718341, -0.2606820819, -6.8



079387708\C, -9.5011427469, 0.5428860739, -4.871548501\H, -9.0858538483, 1.1346975762, -5.6723950921\C, -8.917796385, 0.5678315904, -3.6136332479\H, -8.0473200212, 1.182613732, -3.4430402729\N, 1.0891252081, -0.3054101106, -0.5054902372\C, -0.3236708274, -0.286668678, -0.6167359586\C, -1.1243603214, -0.0799246151, 0.5080506144\H, -0.6628904143, 0.0510552502, 1.4754823118\C, -2.5046825756, -0.054876719, 0.393050362\H, -3.0990780991, 0.081958336, 1.2848923573\C, -3.1385220811, -0.2499659603, -0.8389257046\C, -2.3245745833, -0.4640575463, -1.9566203564\H, -2.7750350547, -0.5873306101, -2.93093085\C, -0.9431303046, -0.4749679183, -1.8535852868\H, -0.3390962422, -0.6198492866, -2.7368782678\C, 1.7472389875, 0.6731756123, 0.27255725\C, 1.3306594778, 2.0066061275, 0.2364303717\H, 0.5064464486, 2.2931463428, -0.3986574554\C, 1.9657038163, 2.9684892194, 1.0076093136\H, 1.6361784733, 3.9952158177, 0.9712528023\C, 3.0369679061, 2.6023925262, 1.808867772\Br, 3.919900875, 3.9232465289, 2.8609019083\C, 3.4731199634, 1.286612655, 1.8542816896\H, 4.3016680968, 1.0069063345, 2.4862012906\C, 2.8225436684, 0.325722974, 1.0948246436\H, 3.1513342221, -0.7011691782, 1.1426660962\C, 1.8339589314, -1.3038793845, -1.1724260211\C, 3.0308715603, -0.987006126, -1.8205022329\H, 3.3885565938, 0.0313253052, -1.8185882405\C, 3.7659611745, -1.9674558343, -2.4699271732\H, 4.6883780021, -1.7115486015, -2.9676392755\C, 3.2951237166, -3.2718848952, -2.49014362\Br, 4.2959065617, -4.6195971784, -3.3919059723\C, 2.1047949323, -3.6075161077, -1.8623683213\H, 1.7480707838, -4.6256563378, -1.8756657276\C, 1.3832943606, -2.6263335911, -1.1990341522\H, 0.4644480329, -2.8890490476, -0.6975379578\\Version=EM64L-G09RevD.01\HF=-11781.5869503\RMSD=6.954e-09\RMSF=1.883e-07\Dipole=-0.0042999, -0.0032716, -0.0040352\Quadrupole=-14.7030353, 13.3748535, 1.3281818, 1.045689, -1.3824329, -8.5452543\PG=C01 [X(C36H24Br4N2)]\@\@

1

1\1\GINC-HPC-CN121\FOpt\RBLYP\6-31G(d)\C18H11Br4N1\ TALIPOVM\27-Feb-2015\0\#\#P BLYP IOP(3/76=0600004000)/6-31G(d) Opt(tight) SCRf(PCM,solvent=Dichloromethane) nosym scf(fermi,xqc,maxcyc=200) int(grid=ultrafine)\Title\0,1\N, -0.0007738506, -0.0434827104, 0.0631200765\C, 1.4170899781, -0.0654709023, 0.0340817933\C, 2.167569594, 0.9234183251, 0.6714968442\H, 1.6675591559, 1.7143714978, 1.2099751867\C, 3.5535123243, 0.8979554945, 0.6166430712\H, 4.1304749437, 1.6647555151, 1.1095230601\C, 4.1880233449, -0.1099372194, -0.0954120433\Br, 6.0903984, -0.1377455904, -0.1853234875\C, 3.4595598067, -1.0981382702, -0.7405900175\H, 3.9628017977, -1.883029194, -1.283190556\C, 2.0744148503, -1.0781925389, -0.6641836433\C, -0.7188649104, 0.1

44841841,1.2571704313\C,-0.1825046911,-0.2585362988,2.485219481\H,0.79  
06765107,-0.7220525756,2.5229815524\C,-0.892738213,-0.079017619,3.6613  
324722\H,-0.4660158705,-0.3951074417,4.6006366317\C,-2.1572318127,0.48  
99373884,3.6205578027\Br,-3.1380424795,0.729068189,5.237429485\C,-2.71  
32883807,0.8837254846,2.4143147709\H,-3.6959664131,1.3283238318,2.3844  
555123\C,-1.9939012833,0.7178630663,1.2397012428\H,-2.4295725325,1.041  
735133,0.3074392502\C,-0.6835496191,-0.1224867012,-1.1768187202\C,-1.4  
755034,-1.2215207397,-1.5198347468\Br,-1.6126307014,-2.6923636713,-0.3  
35741977\C,-2.1469777078,-1.2821614624,-2.7321385519\H,-2.7538876914,-  
2.1383332704,-2.9754991683\C,-2.0038751456,-0.2340307814,-3.6276437045  
\Br,-2.9115659416,-0.3129945306,-5.2945962503\C,-1.2069945936,0.862163  
5082,-3.3321072696\H,-1.1016918851,1.6699249907,-4.0385672611\C,-0.560  
1457218,0.9095114681,-2.107165847\H,0.0537772373,1.761546276,-1.855850  
8819\H,1.4966349011,-1.8587204921,-1.1360445382\\Version=EM64L-G09RevD  
.01\HF=-11033.5093124\RMSD=6.795e-09\RMSF=7.792e-07\Dipole=0.1802492,0  
.4788767,-0.8346802\Quadrupole=-5.7183536,8.5651722,-2.8468187,-0.3404  
671,6.0647903,-1.7112942\PG=C01 [X(C18H11Br4N1)]\@

2

1\1\GINC-HPC-CN122\FOpt\RBLYP\6-31G(d)\C18H10Br5N1\TALIPOVM\27-Feb-201  
5\0\#P BLYP IOP(3/76=0600004000)/6-31G(d) Opt(tight) SCRF(PCM,solvent  
=Dichloromethane) nosym scf(fermi,xqc,maxcyc=200) int(grid=ultrafine)\  
\Title\0,1\N,0.0323991243,-0.2656902543,0.0604466603\C,1.4338418959,-  
0.0774505948,0.0164543716\C,2.078327765,0.7980493143,0.8906904469\H,1.  
5080418426,1.3647887015,1.610175425\C,3.4571882928,0.9533526554,0.8438  
055131\H,3.946209902,1.6329343968,1.5242564258\C,4.1939724526,0.244228  
2917,-0.0905295455\Br,6.0850222186,0.4651176929,-0.1654547405\C,3.5702  
847908,-0.6274510062,-0.9724885657\H,4.14992272,-1.1844200213,-1.69204  
0624\C,2.1964091319,-0.7927582072,-0.9108832502\C,-0.6913432967,0.0426  
819894,1.2393263019\C,-0.499589217,-0.6659245332,2.4308210756\Br,0.712  
1025522,-2.1163456822,2.5034355206\C,-1.2055911923,-0.3498961527,3.581  
4809697\H,-1.0389233553,-0.9085953175,4.4874118445\C,-2.1407762539,0.6  
721082573,3.5392928773\Br,-3.1220007556,1.0958299647,5.1103243117\C,-2  
.3733884215,1.3803257785,2.3709970251\H,-3.1022705989,2.1746144302,2.3  
458623589\C,-1.6407441571,1.0652274427,1.2372914035\H,-1.8045128213,1.  
6236220991,0.3281195656\C,-0.6877736182,-0.3362467338,-1.1588147481\C,  
-1.6102460274,-1.3570871356,-1.406086583\Br,-1.8825825562,-2.731550889  
7,-0.1320056967\C,-2.334369313,-1.4063534982,-2.589211058\H,-3.0438246

149, -2.1995754419, -2.7568295768\C, -2.113808603, -0.4365139858, -3.553156  
0342\Br, -3.0922393183, -0.507612605, -5.1800695918\C, -1.189148139, 0.5779  
177021, -3.3516099639\H, -1.0252509066, 1.3292102598, -4.1075314841\C, -0.4  
921894546, 0.6223799594, -2.1556076437\H, 0.2204433092, 1.4146091902, -1.98  
18979702\H, 1.7132366229, -1.4877260669, -1.580575021\\Version=EM64L-G09R  
evD.01\HF=-13604.570837\RMSD=6.389e-09\RMSF=9.546e-07\Dipole=-0.572824  
1, 0.8950503, -0.541744\Quadrupole=-7.8601909, 6.4727544, 1.3874365, -2.242  
9277, -0.2289601, 0.1769917\PG=C01 [X(C18H10Br5N1)]\@

3

1\1\GINC-HPC-CN123\FOpt\RBLYP\6-31G(d)\C18H9Br6N1\TALIPOVM\27-Feb-2015  
\0\#P BLYP IOP(3/76=0600004000)/6-31G(d) Opt(tight) SCRF(PCM,solvent=  
Dichloromethane) nosym scf(fermi,xqc,maxcyc=200) int(grid=ultrafine)\  
Title\0,1\N,0.0170584323, -0.3285767362, 0.0468010921\C, 1.4164369632, -0  
.1032054793, 0.014905915\C, 1.9718471787, 1.0384133702, 0.5922735051\H, 1.3  
185695578, 1.7568152948, 1.064083409\C, 3.3387882895, 1.2695822576, 0.57008  
80481\H, 3.7486052237, 2.1591734679, 1.021159915\C, 4.1658509064, 0.3506060  
644, -0.0561678727\Br, 6.0406666153, 0.6558379029, -0.1136146771\C, 3.65035  
08068, -0.798146387, -0.6362234206\H, 4.2998631607, -1.5195483952, -1.10351  
72858\C, 2.2836632792, -1.0233635154, -0.5833289995\C, -0.6861960224, -0.03  
28171186, 1.2418244794\C, -0.4751820755, -0.7765764384, 2.4075048264\Br, 0.  
6992488412, -2.2586779659, 2.3894063231\C, -1.1436222658, -0.4786575637, 3.  
5846772238\H, -0.9647271685, -1.0636380357, 4.4715037644\C, -2.0609310632,  
0.5607468314, 3.5927483865\Br, -2.990274156, 0.9629967649, 5.2007809784\C,  
-2.3154657957, 1.3001960738, 2.4485326475\H, -3.032568886, 2.1053902454, 2.  
4633549954\C, -1.619970232, 1.0021625303, 1.2866458575\H, -1.8005361865, 1.  
5831884294, 0.3948263031\C, -0.697320854, -0.3073575932, -1.1777504935\C, -  
1.6883908413, -1.2553589619, -1.4528035929\Br, -2.0383966766, -2.648736360  
7, -0.2229528275\C, -2.4051247496, -1.226684086, -2.6388755938\H, -3.165503  
4672, -1.9656213794, -2.8297900483\C, -2.1086245935, -0.2534746969, -3.5805  
975354\Br, -3.0788335663, -0.2199817646, -5.2142046364\C, -1.1136638143, 0.  
6840749576, -3.3529005548\H, -0.8882851803, 1.43600494, -4.0922142333\C, -0  
.4234918695, 0.6536042233, -2.1507162186\H, 0.3423010207, 1.3898471863, -1.  
9581459074\Br, 1.6106491889, -2.6423980618, -1.2919237724\\Version=EM64L-  
G09RevD.01\HF=-16175.6332131\RMSD=8.293e-09\RMSF=1.038e-06\Dipole=-0.0  
509784, 1.4357324, -0.1620333\Quadrupole=-3.0693404, 6.0030299, -2.9336896  
, -0.2889807, 0.0416814, -0.9929343\PG=C01 [X(C18H9Br6N1)]\@

4

```
1\1\GINC-HPC-CN21\FOpt\RBLYP\6-31G(d)\C18H10Br3N1\TALIPOVM\07-Jan-2015
\0\#P BLYP IOP(3/76=0600004000)/6-31G(d) Opt(tight) SCRF(PCM,solvent=
Dichloromethane) nosym scf(fermi,xqc,maxcyc=200) int(grid=ultrafine)\
Title\0,1\N,-0.1478215742,0.0233887988,0.2753260128\C,1.2160799905,0.
2265675141,0.1061336777\C,2.1784946463,0.5929441262,1.0430294916\H,1.9
254010553,0.7565265563,2.0789681568\C,3.4844618801,0.7472265071,0.6082
781469\H,4.2542105513,1.0292854076,1.3092128188\C,3.8117646035,0.54163
75562,-0.7349701287\Br,5.6276470276,0.7636585985,-1.2789360969\C,2.865
056148,0.1875010682,-1.6765304875\H,3.1408518382,0.0405095949,-2.70925
59152\C,1.5475926368,0.0306844936,-1.2499331649\C,-0.8569612572,0.1294
146787,1.4985215959\C,-0.5149820183,-0.6849046721,2.5752554488\H,0.280
7630381,-1.4071797375,2.4715972615\C,-1.2008210812,-0.5767476873,3.777
0993192\H,-0.9363905614,-1.2047363418,4.6130992763\C,-2.2400407174,0.3
360547684,3.8836732857\Br,-3.1920815143,0.4780022473,5.5249074787\C,-2
.5988088544,1.1473469247,2.8170705777\H,-3.4054187128,1.8563957306,2.9
162216862\C,-1.8960795151,1.048012552,1.6242563211\H,-2.1499377577,1.6
894861097,0.7937795491\C,-0.6985349602,-0.3017206371,-0.9580411803\C,-
2.0154277932,-0.6147761554,-1.283708389\H,-2.7952739636,-0.6234227903,
-0.5382005421\C,-2.3043107419,-0.9213696691,-2.6031360713\H,-3.3150053
072,-1.1671407726,-2.8886026478\C,-1.2932029433,-0.9165170295,-3.56819
88906\Br,-1.7477479225,-1.3423691196,-5.3723102458\C,0.0189507403,-0.6
173846584,-3.2568000404\H,0.7834682862,-0.6263213385,-4.0181663386\C,0
.3208047536,-0.3084526236,-1.9317499659\Version=EM64L-G09RevD.01\HF=-
8461.2802922\RMSD=8.435e-09\RMSF=1.397e-06\Dipole=-0.7026628,0.1055621
,1.2126379\Quadrupole=-0.6351577,3.6915399,-3.0563822,-3.3356188,2.811
1071,-2.6833656\PG=C01 [X(C18H10Br3N1)]\@
```

5

```
1\1\GINC-HPC-CN119\FOpt\RBLYP\6-31G(d)\C36H20Br4N2\TALIPOVM\26-Feb-201
5\0\#P BLYP IOP(3/76=0600004000)/6-31G(d) Opt(tight) SCRF(PCM,solvent
=Dichloromethane) nosym scf(fermi,xqc,maxcyc=200) int(grid=ultrafine)\
Title\0,1\N,-8.8250626182,-0.1712990662,-1.2897630234\C,-7.410894183
5,-0.1902305407,-1.1785874986\C,-6.7664388695,0.6704241221,-0.29389687
35\H,-7.3452607729,1.3699670911,0.2907124024\C,-5.3849339879,0.6422383
512,-0.1816490441\H,-4.9000486393,1.3316819002,0.4937126506\C,-4.61382
78047,-0.2286636387,-0.9579007297\C,-5.2771827493,-1.0795565064,-1.847
5453282\H,-4.7113066493,-1.7832395093,-2.4400510089\C,-6.6594192081,-1
```

.0698506392, -1.9533699972\H, -7.1582340552, -1.7545944888, -2.6230428707\C, -9.7248406215, -0.4067260604, -0.258328645\C, -9.4786193693, -0.7293124867, 1.0736667264\H, -8.4738912853, -0.8220207588, 1.4554445896\C, -10.566415458, -0.9327833167, 1.9063587565\H, -10.4096229015, -1.1826416853, 2.9438709206\C, -11.868215224, -0.8186167976, 1.4101479755\Br, -13.3308334883, -1.105657754, 2.6025747132\C, -12.1269093265, -0.5089493616, 0.0890928622\H, -13.1407605074, -0.4336895284, -0.2723815743\C, -11.0392789616, -0.3024373433, -0.7576021655\C, -9.5462310687, 0.0843402658, -2.4488371509\C, -10.9247947989, 0.0137051734, -2.161626911\C, -11.8610772712, 0.2454108066, -3.1677088259\H, -12.9205910798, 0.1959317672, -2.9695511055\C, -11.3912048038, 0.5458605141, -4.4314309509\Br, -12.6415161538, 0.8667110551, -5.8375377936\C, -10.0253549416, 0.6267614159, -4.7175377611\H, -9.7019104644, 0.8705915342, -5.7172272992\C, -9.0866597212, 0.3980552071, -3.7252613563\H, -8.0325625698, 0.4654382999, -3.9447733383\N, 1.0736023281, -0.3064567055, -0.5071251341\C, -0.3405800404, -0.2876171196, -0.6193463586\C, -1.1300347286, -0.0997887072, 0.5120682492\H, -0.6627801634, 0.0079997205, 1.4796615451\C, -2.5113051077, -0.073220288, 0.3968946143\H, -3.1091212624, 0.0515197634, 1.287676332\C, -3.1374168947, -0.2493910609, -0.841046448\C, -2.3291876992, -0.4455703711, -1.9652619614\H, -2.7823061539, -0.556291215, -2.9393641526\C, -0.946781081, -0.4565865867, -1.8613625605\H, -0.3360141665, -0.5788831893, -2.7435255798\C, 1.8637810164, 0.7247285707, -0.016351844\C, 1.4883136441, 1.9849504714, 0.4416052156\H, 0.4541865806, 2.2913673234, 0.4656888665\C, 2.4851620611, 2.8466183477, 0.8680027687\H, 2.2274142541, 3.8295782201, 1.2296837951\C, 3.825415454, 2.4512630142, 0.8306813531\Br, 5.1583935403, 3.676960904, 1.4342529405\C, 4.2127792292, 1.2080191439, 0.3698435599\H, 5.2546838792, 0.9287278196, 0.3441290152\C, 3.2174950037, 0.3331204128, -0.0622058076\C, 1.9039929289, -1.3593660067, -0.8682244664\C, 3.2431694318, -1.0036767577, -0.6071494563\C, 4.2708904929, -1.9055465983, -0.8774197301\H, 5.302484195, -1.6539660481, -0.6858269518\C, 3.9288636872, -3.1391004009, -1.3964561964\Br, 5.3078326996, -4.4010903246, -1.7827430289\C, 2.6015622407, -3.4988561289, -1.6470337133\H, 2.3785918956, -4.4754404112, -2.0470557207\C, 1.5727942227, -2.610206186, -1.3825830824\H, 0.5479480667, -2.8893576278, -1.571356407\Version=EM64L-G09RevD.01\HF=-11779.2503508\RMSD=2.735e-09\RMSF=1.595e-07\Dipole=-0.0037983,0.0016351,-0.0021718\Quadrupole=-50.7991257,23.0523436,27.746782,0.6886328,-6.1920737,3.7020354\PG=C01 [X(C36H20Br4N2)]\@

1\1\GINC-HPC-CN121\FOpt\RBLYP\6-31G(d)\C36H23Br5N2\TALIPOVM\26-Feb-2015\0\#\#P BLYP IOP(3/76=0600004000)/6-31G(d) Opt(tight) SCRf(PCM,solvent=Dichloromethane) nosym scf(fermi,xqc,maxcyc=200) int(grid=ultrafine)\Title\0,1\N,-8.8409270259,-0.1783610992,-1.2831355573\C,-7.4351153939,-0.2057525128,-1.1143931527\C,-6.7908777581,0.775435576,-0.356705107\H,-7.3688752638,1.5708150255,0.0893321256\C,-5.4175512865,0.7414317127,-0.1821146285\H,-4.9434085804,1.5159414561,0.4013888636\C,-4.6383362037,-0.2589745745,-0.770353676\C,-5.2895617121,-1.2251401808,-1.5408390287\H,-4.7144080615,-2.0178832698,-1.9977957244\C,-6.6663383746,-1.210821578,-1.7028554896\H,-7.1476819995,-1.9836414849,-2.2830665955\C,-9.6792708438,0.1095341194,-0.1820765626\C,-9.4101007499,-0.4332734848,1.0769861106\H,-8.5599165041,-1.0848520367,1.2090668313\C,-10.2246668828,-0.1441869733,2.1615614674\H,-10.0080376842,-0.5689796531,3.1293657821\C,-11.3275398988,0.6783318009,1.9861327579\Br,-12.4562087047,1.0681492504,3.4710687009\C,-11.6190924553,1.2210716954,0.7435610583\H,-12.4740083163,1.8667355134,0.6160121147\C,-10.790375273,0.9432591879,-0.3332141833\H,-11.0072738696,1.3783422898,-1.2968715603\C,-9.4050890004,-0.446126632,-2.5513638925\C,-10.5417186344,-1.2500959408,-2.6694951214\H,-10.9899943302,-1.6781958599,-1.7858827752\C,-11.1015097678,-1.5069516341,-3.9121788468\H,-11.9788811206,-2.1296971398,-3.9922268023\C,-10.5125285051,-0.973213281,-5.0487296858\Br,-11.2708519653,-1.3343358211,-6.7590578621\C,-9.378431948,-0.1800626838,-4.9562060137\H,-8.9301731977,0.2382463887,-5.8439685067\C,-8.8340970705,0.0883044216,-3.7092180341\H,-7.9605558198,0.7177293602,-3.6341158625\N,1.0898154695,-0.2955276569,-0.5262094303\C,-0.3202860689,-0.295343227,-0.5739183049\C,-1.0669044687,-0.2489488526,0.6039384015\H,-0.5682857672,-0.2371735946,1.5592028612\C,-2.4511051178,-0.233252934,0.5526576857\Br,-3.359158213,-0.2287862948,2.2339565843\C,-3.1603347346,-0.2773281793,-0.6511959054\C,-2.3834964321,-0.3464020502,-1.8149023345\H,-2.8898801407,-0.3654247303,-2.7689577305\C,-1.0006897653,-0.3471394502,-1.7919207626\H,-0.44720897,-0.376362401,-2.7177284452\C,1.7714774498,0.5196297856,0.4092314274\C,1.3715073727,1.8404265764,0.624319018\H,0.5393431819,2.2462851853,0.0694277093\C,2.034861564,2.6387733706,1.5441415328\H,1.719277958,3.6580041107,1.7036154158\C,3.1172104862,2.1210927579,2.2402705879\Br,4.0394498885,3.2187056681,3.4944808124\C,3.5371324779,0.8152820244,2.0351039336\H,4.3752007382,0.4175692446,2.5858856292\C,2.8578202563,0.0158670302,1.1277012647\H,3.1729776906,-1.0054921854,0.9774821014\C,1.8290743568,-1.1185696407,-1.4094833189\C,2.9653836046,-0.623435742,-2.0529

271824\H,3.2761774151,0.396249798,-1.8833738606\C,3.6995901482,-1.4290  
67124,-2.91056425\H,4.5758414982,-1.0379421164,-3.4036351615\C,3.28602  
13598,-2.73268313,-3.1416851912\Br,4.2837476231,-3.8385492092,-4.32918  
65163\C,2.1558183493,-3.2420281227,-2.5195714117\H,1.8454931853,-4.259  
7698519,-2.6978766032\C,1.4364821517,-2.4373364097,-1.6484597922\H,0.5  
66059655,-2.8367946062,-1.150559907\Version=EM64L-G09RevD.01\HF=-1435  
2.6471063\RMSD=7.590e-09\RMSF=1.985e-07\Dipole=0.4788407,-0.0057941,-0  
.676238\Quadrupole=-14.9976988,16.450378,-1.4526792,0.8385689,2.692381  
, -10.4943945\PG=C01 [X(C36H23Br5N2)]\@

7

1\1\GINC-HPC-CN55\FOpt\RBLYP\6-31G(d)\C36H23Br5N2\ TALIPOVM\05-Aug-2015  
\0\#P BLYP IOP(3/76=0600004000)/6-31G(d) Opt(tight) SCRF(PCM,solvent=  
Dichloromethane) nosym scf(fermi,xqc,maxcyc=200) int(grid=ultrafine)\  
Title\0,1\N,-8.8162017097,-0.1579435948,-1.3125594234\C,-7.4077479633  
, -0.1800243578,-1.1881869956\C,-6.7744500961,0.4782573825,-0.131237386  
\H,-7.3645227123,1.0242842202,0.5892063474\C,-5.3954351511,0.446507898  
2,-0.0087095739\H,-4.9329212051,0.9859833445,0.8052520973\C,-4.5967532  
274,-0.2242118448,-0.9403977127\C,-5.2405882767,-0.8721773815,-1.99938  
42369\C,-6.6200822913,-0.8606136818,-2.119865727\H,-7.0918298851,-1.39  
01147791,-2.9337875434\C,-9.6312789109,-0.3032958927,-0.1659009185\C,-  
9.3191470192,-1.2510648308,0.8118604378\H,-8.4531584473,-1.8832889405,  
0.6882555041\C,-10.1118616161,-1.3901002872,1.9413336956\H,-9.86274885  
09,-2.1254720062,2.6904510134\C,-11.2354535206,-0.5901835568,2.0882536  
834\Br,-12.3342968592,-0.7864641312,3.6321866489\C,-11.5695126392,0.35  
08121164,1.1256893083\H,-12.4406811373,0.9748504024,1.2505302536\C,-10  
.7625151648,0.4978793978,0.007333859\H,-11.0123195066,1.2406099841,-0.  
7349419361\C,-9.4126557501,0.0111687643,-2.5837476468\C,-10.520288756,  
-0.754540734,-2.9558544341\H,-10.9192777468,-1.4880433174,-2.271874938  
6\C,-11.1138493303,-0.5838649765,-4.1976986438\H,-11.968587917,-1.1805  
726178,-4.475764275\C,-10.5873025355,0.3450230656,-5.0828840985\Br,-11  
.3917602607,0.5736369431,-6.7947221216\C,-9.4826809717,1.1097118624,-4  
.7380091081\H,-9.0836820486,1.8361264559,-5.4287451792\C,-8.9048345175  
,0.9474754668,-3.4877190296\H,-8.0548550253,1.5526313846,-3.2115513471  
\N,1.1091682273,-0.288024016,-0.4490323241\C,-0.3062142953,-0.27679705  
78,-0.5539867593\C,-1.1389218997,-0.3293537338,0.5655608109\Br,-0.3758  
636256,-0.4963931063,2.2952486216\C,-2.5182256855,-0.3064515768,0.4463  
666368\C,-3.12335982,-0.2470874604,-0.8121575643\C,-2.294021064,-0.216

8943439, -1.9381655378\H, -2.7288400802, -0.1503798005, -2.9242016298\C, -0.915775791, -0.2276090132, -1.8072710865\H, -0.2870083483, -0.1839345746, -2.6844935306\C, 1.7897700969, 0.8329298154, 0.0547963828\C, 1.2012742597, 2.1009373078, 0.0137771729\H, 0.2251425906, 2.2294752462, -0.4270250506\C, 1.8603226269, 3.2067796674, 0.5305357569\H, 1.3928328408, 4.1784498065, 0.4901249777\C, 3.1221512211, 3.0574011349, 1.0828770545\Br, 4.0354060276, 4.5777604771, 1.782329071\C, 3.7257547486, 1.8095549814, 1.1330396012\H, 4.7037771281, 1.6932387975, 1.5738438418\C, 3.059335357, 0.7036490945, 0.6301202911\H, 3.5268956687, -0.2662146033, 0.6937554152\C, 1.7944771492, -1.4296906128, -0.9344085932\C, 2.8554450676, -1.3074303428, -1.8331403867\H, 3.1749041805, -0.3283710768, -2.1571008453\C, 3.5020515157, -2.4358647672, -2.3157720072\H, 4.3206666927, -2.3365070659, -3.011397181\C, 3.0717241694, -3.6917281547, -1.9121491782\Br, 3.9477115326, -5.2435350483, -2.5858297069\C, 2.0155619508, -3.834765956, -1.0247693206\H, 1.6949972308, -4.8152965075, -0.7091330468\C, 1.3868516893, -2.7012124986, -0.5303356771\H, 0.5839523129, -2.7983251007, 0.1847787832\H, -4.6598276781, -1.4278581965, -2.721305704\H, -3.1224849475, -0.3734634724, 1.3370701395\\Version=EM64L-G09RevD.01\HF=-14352.6489104\RMSD=9.297e-09\RMSF=2.704e-07\Dipole=-0.7869787, -0.2226023, -0.8374613\Quadrupole=-7.2966343, 5.4063442, 1.89029, -1.7017777, -1.2600326, -5.9459652\PG=C01 [X(C36H23Br5N2)]\@

8

1\1\GINC-HPC-CN109\FOpt\RBLYP\6-31G(d)\C36H22Br6N2\ TALIPOVM\05-Aug-2015\0\#\#P BLYP IOP(3/76=0600004000)/6-31G(d) Opt(tight) SCRf(PCM,solvent=Dichloromethane) nosym scf(fermi,xqc,maxcyc=200) int(grid=ultrafine)\Title\0,1\N, -8.8388052707, -0.252409146, -1.3465874065\C, -7.4263648232, -0.2779421346, -1.2235580934\C, -6.7554914399, 0.7938272097, -0.6349333555\H, -7.3340416195, 1.6399758801, -0.2947513777\C, -5.3779900344, 0.7931722921, -0.4977213649\H, -4.8915122596, 1.6522964255, -0.060630408\C, -4.6139476453, -0.2833041332, -0.9574778148\C, -5.2788298204, -1.3639736901, -1.5413361355\C, -6.6586263568, -1.360439739, -1.6591007173\Br, -7.5157321844, -2.8929273408, -2.3759936045\C, -9.6024025307, -0.2590450563, -0.1525158656\C, -9.337249039, -1.2156083644, 0.8276736824\H, -8.5838353414, -1.9671281512, 0.6453711133\C, -10.0440631548, -1.2178629365, 2.0213859955\H, -9.8338391122, -1.9594694208, 2.7761073481\C, -11.0357903466, -0.2696980536, 2.2237951636\Br, -12.0189469586, -0.2745073823, 3.8553214381\C, -11.3248373622, 0.6813739931, 1.255686729\H, -12.0942207436, 1.4180927414, 1.4264043401\C, -10.6001111614, 0.69056706, 0.0728513781\H, -10.809297055, 1.4386440649, -0.6



768928294\C, -9.4371611298, -0.1329932334, -2.6130822853\C, -10.7353055142  
, -0.6044486905, -2.8389531616\H, -11.2877749443, -1.0685674385, -2.0372009  
86\C, -11.3220819581, -0.4923399857, -4.0891624326\H, -12.3237580065, -0.86  
06710365, -4.2481497964\C, -10.6090478246, 0.0767134537, -5.1342484545\Br,  
-11.4127184328, 0.2232090719, -6.8565664797\C, -9.3174833347, 0.5375100583  
, -4.9367210197\H, -8.7654254384, 0.982346571, -5.7501117336\C, -8.73791302  
78, 0.4387660842, -3.6801483575\H, -7.7375231252, 0.8143186735, -3.53173969  
3\N, 1.0885324488, -0.2953688291, -0.4669020832\C, -0.3256842293, -0.286037  
1314, -0.5726722328\C, -1.144927335, 0.2538952182, 0.4213889211\Br, -0.3682  
506861, 0.9388003749, 2.0103167957\C, -2.5241223006, 0.264017968, 0.2973432  
486\C, -3.1391539147, -0.2902527871, -0.8274747095\C, -2.3264553935, -0.853  
056782, -1.8156695847\H, -2.7714835154, -1.2706286799, -2.7063171674\C, -0.  
9479192823, -0.8444202778, -1.6889759893\H, -0.3290259578, -1.2641399994, -  
2.4682213264\C, 1.8140239673, 0.9044029024, -0.5670848385\C, 1.2735955426,  
2.0101997575, -1.2303625785\H, 0.3006193656, 1.941848982, -1.691292341\C, 1  
.9773464478, 3.2029865802, -1.3112962992\H, 1.5470870251, 4.047124642, -1.8  
276046536\C, 3.2361124992, 3.2966163888, -0.7401580471\Br, 4.2107284213, 4.  
9305489885, -0.8605695228\C, 3.7926661189, 2.2113984496, -0.0791896345\H, 4  
.7686146673, 2.2899652985, 0.3742976474\C, 3.0814111709, 1.025928382, 0.014  
0630194\H, 3.5119532279, 0.1940201157, 0.5488303943\C, 1.7297630643, -1.554  
0066861, -0.3485549012\C, 2.7811022195, -1.9120388088, -1.1937956407\H, 3.1  
272050931, -1.2179873684, -1.9448264236\C, 3.3843899069, -3.1557798263, -1.  
0770184411\H, 4.1959184859, -3.4290390495, -1.7332185288\C, 2.9199757601, -  
4.0508383129, -0.1238370881\Br, 3.7362632841, -5.7652501569, 0.0278232132\  
C, 1.8725284152, -3.7162056541, 0.7213477276\H, 1.5253761807, -4.4153366708  
, 1.465971816\C, 1.287530948, -2.462983761, 0.6127638496\H, 0.4920930591, -2  
.1787812939, 1.2851555283\H, -4.7267271145, -2.2299486462, -1.8703964088\H  
, -3.1197605949, 0.6702290275, 1.0992724645\\Version=EM64L-G09RevD.01\HF=  
-16923.7100884\RMSD=8.070e-09\RMSF=3.052e-07\Dipole=-0.0083198, -0.0085  
192, 0.0018159\Quadrupole=-13.7848084, 7.9120073, 5.8728011, -10.7847213, -  
12.4866675, -1.3554751\PG=C01 [X(C36H22Br6N2)]\@

9

1\1\GINC-HPC-CN124\FOpt\RBLYP\6-31G(d)\C36H22Br6N2\ TALIPOVM\27-Feb-201  
5\0\#\#P BLYP IOP(3/76=0600004000)/6-31G(d) Opt(tight) SCRF(PCM,solvent  
=Dichloromethane) nosym scf(fermi,xqc,maxcyc=200) int(grid=ultrafine)\  
\Title\0,1\N, -8.839332106, -0.1454387432, -1.2944184349\C, -7.4385949544  
, -0.2211908797, -1.153291934\C, -6.7259828276, 0.7914358381, -0.5051280366

\H, -7.247682096, 1.6515767001, -0.1152355801\C, -5.3533632928, 0.698364788  
8, -0.3694884757\H, -4.8191049634, 1.4937722567, 0.1289292541\C, -4.6236753  
993, -0.3800150777, -0.8804951645\C, -5.3576026996, -1.3741473105, -1.52677  
73084\Br, -4.483285715, -2.9165884807, -2.2307276756\C, -6.7355183389, -1.3  
152445108, -1.6587524914\H, -7.2612300064, -2.1195597938, -2.1463125529\C,  
-9.6349362561, 0.3553351846, -0.2353592079\C, -9.3851019136, -0.0260047217  
, 1.0845740653\H, -8.5814885483, -0.7129716527, 1.3022207947\C, -10.1615400  
214, 0.4692460129, 2.1218008313\H, -9.9617674967, 0.1692609642, 3.138649475  
9\C, -11.2065702319, 1.3356068497, 1.8370276094\Br, -12.2835241009, 2.00749  
34762, 3.2573679273\C, -11.4784608844, 1.719105708, 0.5320840102\H, -12.288  
8372321, 2.3988183444, 0.3195692651\C, -10.6866569848, 1.2353813158, -0.498  
7891561\H, -10.8862329973, 1.5438185903, -1.513778533\C, -9.4623649658, -0.  
5955249593, -2.4841255007\C, -10.6118438665, -1.38585112, -2.4258277155\H,  
-11.022024581, -1.6660503799, -1.4675199233\C, -11.2330182231, -1.81639372  
03, -3.5890029949\H, -12.1207242515, -2.4270506612, -3.5349414216\C, -10.69  
17209351, -1.4704369923, -4.8181453025\Br, -11.5340470414, -2.0699151426, -  
6.417852682\C, -9.5454233788, -0.6934195671, -4.8987183355\H, -9.135330428  
7, -0.4220953634, -5.8589543611\C, -8.9399014035, -0.25028281, -3.732356471  
2\H, -8.0571793323, 0.3681514754, -3.7920476807\N, 1.0904009757, -0.2921550  
294, -0.5223932909\C, -0.3166142781, -0.3294243666, -0.6055736419\C, -1.088  
4746497, -0.4870810158, 0.5459941054\H, -0.6130759335, -0.598820448, 1.5064  
963575\C, -2.4708265051, -0.5095139355, 0.4555717347\Br, -3.4434666368, -0.  
7498925809, 2.0789629729\C, -3.1439241674, -0.3995229738, -0.7607778247\C,  
-2.3471334699, -0.2577672533, -1.901586685\H, -2.8322065316, -0.159385595,  
-2.8615532961\C, -0.9669344053, -0.2125482272, -1.8370968024\H, -0.3905361  
4, -0.0799477222, -2.7394411971\C, 1.7239988754, 0.368513919, 0.5583979592\  
C, 1.2886528677, 1.629321871, 0.9719652444\H, 0.4661591873, 2.1069470108, 0.  
4614808742\C, 1.9045397182, 2.2764497509, 2.0328140613\H, 1.5621196029, 3.2  
504424618, 2.3457732005\C, 2.974941553, 1.6686749492, 2.6724064326\Br, 3.83  
23346449, 2.5600788171, 4.1209428709\C, 3.4297038743, 0.4213151597, 2.27136  
61259\H, 4.258169655, -0.047709557, 2.7788205981\C, 2.7973195589, -0.229025  
7539, 1.2219219109\H, 3.139195847, -1.2064660562, 0.9172166718\C, 1.8784231  
823, -0.9357918158, -1.5071900308\C, 3.0135458852, -0.3076297261, -2.023844  
9805\H, 3.2849479986, 0.6782703786, -1.6781690475\C, 3.7968031851, -0.93791  
27822, -2.979299842\H, 4.6718903412, -0.4451128177, -3.3733039938\C, 3.4338  
604332, -2.1965946206, -3.435231391\Br, 4.4993815355, -3.0601539607, -4.757  
0926103\C, 2.3058329798, -2.8350083699, -2.9414977641\H, 2.0348995925, -3.8  
175814983, -3.2951052059\C, 1.5371539233, -2.20754701, -1.972301485\H, 0.66

79947748, -2.7092968206, -1.5749683244\\Version=EM64L-G09RevD.01\HF=-169  
23.7087315\RMSD=4.827e-09\RMSF=2.458e-07\Dipole=0.0376995,0.7551559, -0  
.3874958\Quadrupole=-5.088289,10.14156, -5.053271, -5.1341874,1.3295688,  
-13.2224058\PG=C01 [X(C36H22Br6N2)]\@

MC, tris(2-bromo-4-(tert-butyl)phenyl)amine

1\1\GINC-HPC-CN119\FOpt\RBLYP\6-31G(d)\C30H36Br3N1\TALIPOVM\27-Mar-201  
5\0\#\#P BLYP IOP(3/76=0600004000)/6-31G(d) Opt(tight) SCRF(PCM,solvent  
=Dichloromethane) nosym scf(fermi,xqc,maxcyc=200) int(grid=ultrafine)\  
\Title\0,1\N,0.0166035312, -0.6088477398,0.0448941486\C,1.420513168, -0  
.4069297177,0.0316320179\C,1.9983617139,0.7171073717,0.6237021514\H,1.  
3547867431,1.4426716665,1.0991167392\C,3.3684413235,0.9140981105,0.610  
6126181\H,3.7628925161,1.8013658631,1.0836336678\C,4.2339426181,0.0073  
265486, -0.0097352773\C,5.745215754,0.2625556107, -0.0199632625\C,3.6577  
389046, -1.1173901059, -0.5970567529\H,4.2688822751, -1.8639358629, -1.074  
8963067\C,2.2855625865, -1.3241749504, -0.5623427398\Br,1.5963300065, -2.  
9293719458, -1.3049817036\C, -0.6928871556, -0.3053234015,1.2350486982\C,  
-0.5257442208, -1.0625120576,2.3983565101\Br,0.6085737677, -2.584739442,  
2.3795398408\C, -1.2002308701, -0.7541493659,3.5656627521\H, -1.028797239  
8, -1.3734435948,4.432005629\C, -2.1038769456,0.311669205,3.6260228573\C  
, -2.8386628266,0.609891354,4.9378587771\C, -2.2921778403,1.0489932723,2  
.4584440271\H, -2.9785874343,1.8800918922,2.4416718749\C, -1.5956481827,  
0.7519540019,1.2937485459\H, -1.7528381882,1.351017985,0.4087808938\C, -  
0.6820522536, -0.5412063145, -1.1877028794\C, -1.6927233742, -1.4533561602  
, -1.5052413764\Br, -2.0989846637, -2.867355913, -0.3056510823\C, -2.387734  
619, -1.3771615613, -2.6983953587\H, -3.1581570146, -2.1081515808, -2.88683  
98465\C, -2.0901032266, -0.4010294775, -3.6547849314\C, -2.8767458161, -0.3  
631823817, -4.9698858643\C, -1.0645288917,0.4920752525, -3.3498307661\H, -  
0.7872465651,1.2650553071, -4.0482435691\C, -0.3835953803,0.4278279149, -  
2.1406360614\H,0.3975723629,1.1429129011, -1.9280108742\C, -3.7807059903  
,1.8134217931,4.8100892301\C, -1.8107766801,0.9180615033,6.0424589609\C  
, -3.6759468326, -0.6159753056,5.3478033938\H, -4.4173604183, -0.854215753  
5,4.5845157628\H, -4.2030199675, -0.4154004259,6.2817333663\H, -3.0560251  
347, -1.4989352897,5.5001617455\H, -3.2419925397,2.7239586333,4.54627572  
44\H, -4.2772190225,1.9889433555,5.7644025025\H, -4.5553412317,1.6448402  
851,4.0616114408\H, -1.2075586536,1.7884143338,5.7818711877\H, -1.134952  
6728,0.0807197044,6.2133883152\H, -2.3218758683,1.1293948722,6.98286515  
48\C,6.51829997, -0.8471638616, -0.7430125594\C,6.2598158511,0.342620902

6, 1.4293220733\C, 6.0314350457, 1.5950069393, -0.7374861953\H, 6.074724585  
2, -0.5915236971, 1.960543871\H, 5.7795364508, 1.1462129452, 1.9865742008\H  
, 7.334671673, 0.5295081513, 1.436465303\H, 6.382556601, -1.8162731281, -0.2  
621480948\H, 7.5837320109, -0.6179331265, -0.7260270731\H, 6.2175726017, -0  
.9377029437, -1.7871938301\C, -2.4146851884, 0.7774950958, -5.8850852158\C  
, -4.3732172531, -0.1618538777, -4.6671787786\C, -2.6830820511, -1.69311116  
19, -5.7220080044\H, -4.5414154027, 0.7775347399, -4.1394272735\H, -4.77566  
85752, -0.9676753793, -4.0541362263\H, -4.9441090928, -0.1352563476, -5.596  
4725047\H, -1.6309108061, -1.8590574048, -5.9553575756\H, -3.2403592977, -1  
.67884402, -6.6598326624\H, -3.035547166, -2.5439239654, -5.1397678209\H, -  
2.550279697, 1.7530264751, -5.4172786959\H, -3.0021730229, 0.767429638, -6.  
8031430657\H, -1.3657775884, 0.6743260503, -6.1640576294\H, 5.6842053571, 1  
.5635454597, -1.7707830927\H, 7.1041093453, 1.7939514062, -0.7466020624\H,  
5.5423760994, 2.4345607206, -0.2444569686\\Version=EM64L-G09RevD.01\HF=-  
8933.888762\RMSD=9.612e-09\RMSF=4.436e-07\Dipole=-0.0208964, 2.1036988,  
-0.1872739\Quadrupole=6.3803515, -12.6858584, 6.3055069, 0.4099598, 0.0725  
399, 1.8173194\PG=C01 [X(C30H36Br3N1)]\@\

Tris(4-(tert-butyl)phenyl)amine

1\1\GINC-HPC-CN124\FOpt\RBLYP\6-31G(d)\C30H39N1\TALIPOVM\05-Aug-2015\0  
\#\P BLYP IOP(3/76=0600004000)/6-31G(d) Opt(tight) SCRF(PCM,solvent=Di  
chloromethane) nosym scf(fermi,xqc,maxcyc=200) int(grid=ultrafine)\Title\\\0,  
1\N, 0.0107567965, 0.0335724355, -0.0250885033\C, 1.4259608278, 0.04  
80087317, -0.0202020759\C, 2.1316161366, 0.9401720762, 0.7916678159\H, 1.59  
01098319, 1.632322439, 1.4194404609\C, 3.5166278419, 0.9422405407, 0.798113  
8325\H, 4.0203267752, 1.6490084178, 1.4424359785\C, 4.2658149197, 0.0782463  
466, -0.0091720179\C, 5.7975348823, 0.1252552517, 0.0257721314\C, 3.5463646  
954, -0.7987610439, -0.8211602654\H, 4.0639110101, -1.4945556087, -1.462863  
8485\C, 2.1566874078, -0.8249323918, -0.8237960063\C, -0.7020194007, 0.1493  
563273, 1.1919928526\C, -0.2868300171, -0.5401791026, 2.3345860897\C, -0.98  
48542294, -0.4165895919, 3.5242743725\H, -0.6272342714, -0.9676880218, 4.38  
26113028\C, -2.1329153611, 0.3769233187, 3.6345777942\C, -2.8772983655, 0.4  
733271181, 4.9710783924\C, -2.5396612179, 1.0504430993, 2.4827591646\H, -3.  
4132768662, 1.6830688712, 2.5022927099\C, -1.8380354054, 0.9506605883, 1.28  
69450751\H, -2.1778992927, 1.4988124332, 0.4206405502\C, -0.6923659951, -0.  
0894193301, -1.2476087086\C, -1.8087419556, -0.9236018709, -1.3513728416\C  
, -2.4961159085, -1.0345002634, -2.5485055509\H, -3.3539789907, -1.69118986  
37, -2.5827221158\C, -2.1018757131, -0.3423535877, -3.6997495308\C, -2.8889

883831, -0.5067445887, -5.0047947962\C, -0.980365422, 0.4787382556, -3.5817  
843406\H, -0.6283147619, 1.0441904664, -4.4303680826\C, -0.2920724415, 0.61  
4020937, -2.381686544\H, 0.5644863968, 1.2696670794, -2.327700348\C, -4.103  
1458585, 1.3914579239, 4.8882147606\C, -1.9305392023, 1.0342421666, 6.04865  
51042\C, -3.3556328374, -0.9276073374, 5.3963486534\H, -4.038154984, -1.346  
9108863, 4.656160511\H, -3.8821714415, -0.8744841116, 6.3507732826\H, -2.52  
33976571, -1.620888957, 5.5147225259\H, -3.8279502516, 2.411828211, 4.61965  
30152\H, -4.5984356436, 1.4280705464, 5.8587833628\H, -4.8307043099, 1.0316  
563972, 4.160072807\H, -1.5825113123, 2.0322088193, 5.7794273155\H, -1.0549  
332285, 0.400768678, 6.1874782411\H, -2.4466090829, 1.1028736929, 7.0078113  
943\C, 6.4319087939, -0.8983748202, -0.9241414189\C, 6.2895640458, -0.17717  
1032, 1.4535812304\C, 6.2793955598, 1.5277873342, -0.3900293078\H, 5.971548  
1585, -1.1705524485, 1.7722805745\H, 5.9066272815, 0.544072158, 2.174960959  
8\H, 7.3795594535, -0.1413035047, 1.4942677569\H, 6.1532970647, -1.91998657  
89, -0.6639089285\H, 7.5182427623, -0.8275933166, -0.8647782634\H, 6.146029  
6386, -0.7206671471, -1.961294037\C, -2.3040845842, 0.3348445579, -6.145905  
6301\C, -4.3486637255, -0.0671999293, -4.785037896\C, -2.8644049608, -1.984  
5497931, -5.4380621287\H, -4.3986373387, 0.980603502, -4.4864601851\H, -4.8  
376675908, -0.6590666885, -4.0118628084\H, -4.9222726454, -0.1845742579, -5  
.7060169758\H, -1.8419524321, -2.3216843873, -5.6124881027\H, -3.427283173  
3, -2.1172622211, -6.3635704517\H, -3.3071898252, -2.6349406178, -4.6842764  
82\H, -2.3202882279, 1.4000668958, -5.9134138303\H, -2.8950785534, 0.185600  
584, -7.0498431004\H, -1.2761361619, 0.0510073248, -6.3733876499\H, 5.95511  
07319, 1.7657049717, -1.4038107088\H, 7.3692622068, 1.5774150581, -0.362685  
8933\H, 5.8952989404, 2.3013484183, 0.2742813169\H, -2.1367819935, -1.48469  
03074, -0.4888149595\H, 0.5866702467, -1.1735355458, 2.2870031109\H, 1.6366  
386151, -1.5282628199, -1.4573001115\\Version=EM64L-G09RevD.01\HF=-1220.  
6967916\RMSD=4.641e-09\RMSF=2.487e-07\Dipole=-0.0040013, -0.0075319, 0.0  
15959\Quadrupole=3.013266, -6.0173197, 3.0040538, 0.2279432, 0.1473069, 0.8  
948516\PG=C01 [X(C30H39N1)]\@

MB Cation Radical

1\1\GINC-HPC-CN8\Stability\UBLYP\6-31G(d)\C18H12Br3N1(1+,2)\TALIPVOM\0  
4-Jun-2014\0\#P BLYP IOP(3/76=0600004000)/6-31G(d) stable(opt) pop(np  
a) scrf(check) guess(read) geom(allcheck) nosym scf(fermi,xqc,maxcyc=2  
00) int(grid=ultrafine)\Title\1,2\N,0,0.0097087448, -0.0043564374, -0.  
000447635\C, 0, 1.4144624996, 0.0238734621, -0.0017888503\C, 0, 2.0972217721

,0.8891608479,0.8665337016\H,0,1.5474577487,1.5542853719,1.513059653\C  
,0,3.4774182714,0.9215945526,0.8586152984\H,0,4.0068605379,1.598748908  
4,1.5090226165\C,0,4.1777925643,0.0856372002,-0.0078145579\Br,0,6.0632  
48853,0.1298861896,-0.0136258973\C,0,3.511611703,-0.7818745272,-0.8702  
478597\H,0,4.0680975534,-1.4348719877,-1.5228178631\C,0,2.131247663,-0  
.8113122067,-0.8721607684\H,0,1.6088865065,-1.5006068411,-1.5161539462  
\C,0,-0.6924723882,0.0999679041,1.2119835681\C,0,-0.2075485371,-0.5467  
001652,2.3589499\H,0,0.683134565,-1.152087836,2.3047926597\C,0,-0.8991  
943091,-0.4435515243,3.5492908702\H,0,-0.5424473716,-0.9538142458,4.42  
92551721\C,0,-2.0688710954,0.3111179812,3.5993081205\Br,0,-3.006868118  
7,0.4561153437,5.2289094836\C,0,-2.5584115202,0.9605133882,2.468493460  
8\H,0,-3.4563096342,1.5541060645,2.5271293082\C,0,-1.8748866927,0.8528  
724045,1.2737513339\H,0,-2.2310412705,1.3765827943,0.4010631672\C,0,-0  
.6918458444,-0.1333214701,-1.2102981865\C,0,-1.8512265428,-0.922061570  
9,-1.2663457236\H,0,-2.1877316945,-1.4549418298,-0.3914189822\C,0,-2.5  
362873077,-1.0523749848,-2.457825465\H,0,-3.4159402288,-1.6731391203,-  
2.511574173\C,0,-2.0717955534,-0.3898614838,-3.5916751728\Br,0,-3.0120  
678396,-0.564968971,-5.2169096776\C,0,-0.925290353,0.3999965027,-3.547  
5924284\H,0,-0.5883066372,0.9199185653,-4.4296623713\C,0,-0.2319056115  
,0.5261359022,-2.3605733217\H,0,0.6397695679,1.1590618189,-2.311745433  
9\\Version=EM64L-G09RevD.01\HF=-8462.2554141\S2=0.801744\S2-1=0.\S2A=0  
.752641\RMSD=4.529e-09\Dipole=-0.0106403,-0.0098607,-0.0075292\Quadrup  
ole=3.9564258,-7.8688168,3.912391,0.2201757,-0.0183929,1.1660148\PG=C0  
1 [X(C18H12Br3N1)]\@

#### TAB Cation Radical

1\1\GINC-HPC-CN12\Stability\UBLYP\6-31G(d)\C36H24Br4N2(1+,2)\TALIPOVM\  
07-Jan-2015\0\#P BLYP IOP(3/76=0600004000)/6-31G(d) stable(opt) pop(n  
bo) scrf(check) guess(read) geom(allcheck) nosym scf(fermi,xqc,maxcyc=  
200) int(grid=ultrafine)\Title\1,2\N,0,-8.7975634224,-0.1789951434,-  
1.2869055209\C,0,-7.4285181887,-0.2003063963,-1.178248679\C,0,-6.76774  
83695,0.5210045801,-0.1554636941\H,0,-7.3411338585,1.1270894105,0.5263  
536948\C,0,-5.4033404127,0.4949268499,-0.0520622908\H,0,-4.9430067219,  
1.1001257993,0.7122304172\C,0,-4.5948971654,-0.2428352641,-0.952189641  
\C,0,-5.2722609899,-0.9586875953,-1.9704236394\H,0,-4.7144545401,-1.57  
86417051,-2.6535941038\C,0,-6.6359966227,-0.9441554476,-2.0846829873\H  
,0,-7.1118959997,-1.534728432,-2.8500517631\C,0,-9.6242074225,0.137844  
5732,-0.1680351332\C,0,-9.4676353253,-0.5471702673,1.0360894656\H,0,-8

.7177979844, -1.3185460369, 1.1258926325\C, 0, -10.2834512851, -0.248100808  
1, 2.1169465861\H, 0, -10.1672941942, -0.7796392356, 3.0480547703\C, 0, -11.2  
601802563, 0.7285363145, 1.9810221238\Br, 0, -12.3832351449, 1.1362712153, 3  
.4570296493\C, 0, -11.4335218569, 1.4105446619, 0.7840328343\H, 0, -12.19429  
59989, 2.1693685597, 0.6927400445\C, 0, -10.6116882335, 1.1134661051, -0.291  
9853804\H, 0, -10.7330876583, 1.6434333771, -1.2243721282\C, 0, -9.449153480  
1, -0.4673791889, -2.5224823747\C, 0, -10.4878483421, -1.3961040622, -2.5562  
770563\H, 0, -10.7799381981, -1.9126274182, -1.6548017114\C, 0, -11.14275175  
76, -1.6630612355, -3.748435964\H, 0, -11.9430140003, -2.3853096345, -3.7780  
644287\C, 0, -10.7517055375, -0.9984691122, -4.9031411496\Br, 0, -11.6469320  
887, -1.3633243902, -6.5375414725\C, 0, -9.7214491406, -0.0687344741, -4.883  
0757383\H, 0, -9.4353239112, 0.450308296, -5.7840471156\C, 0, -9.0734512037,  
0.2007966167, -3.6870312603\H, 0, -8.2845725766, 0.9369801771, -3.657416004  
3\N, 0, 1.0452756947, -0.3076726825, -0.5106745049\C, 0, -0.3239328063, -0.29  
54975821, -0.6171315874\C, 0, -1.1364750615, 0.0899994864, 0.4757672736\H, 0  
, -0.679599611, 0.3403345276, 1.4189833183\C, 0, -2.5001259383, 0.1044524862  
, 0.3611920844\H, 0, -3.078124742, 0.3583569923, 1.2351360835\C, 0, -3.158200  
08, -0.263096739, -0.8387603599\C, 0, -2.3302831737, -0.6500282423, -1.92179  
489\H, 0, -2.7708140748, -0.8932368507, -2.8753192775\C, 0, -0.9653575581, -0  
.6664918976, -1.8229393854\H, 0, -0.3729869428, -0.928679843, -2.6839430536  
\C, 0, 1.718818192, 0.4798729643, 0.4699397229\C, 0, 1.4601759094, 1.84602502  
33, 0.5710292936\H, 0, 0.7463181723, 2.3114649246, -0.0915614639\C, 0, 2.1292  
136182, 2.6118576027, 1.5139115482\H, 0, 1.9343129003, 3.6696495051, 1.59132  
87017\C, 0, 3.0629504309, 2.0057015898, 2.3427793418\Br, 0, 3.9863123842, 3.0  
534040154, 3.6295603338\C, 0, 3.3372518368, 0.6480386412, 2.2452507872\H, 0,  
4.0630554394, 0.1890690762, 2.8975175175\C, 0, 2.661339517, -0.1154526484, 1  
.3062049387\H, 0, 2.8610701666, -1.1732177261, 1.2271316118\C, 0, 1.85080786  
97, -1.1079558108, -1.374139503\C, 0, 2.9312074301, -0.5337577842, -2.041747  
8648\H, 0, 3.1419740523, 0.5181455478, -1.924138362\C, 0, 3.7327189395, -1.31  
09219862, -2.8633675068\H, 0, 4.565800434, -0.8677712785, -3.3853701998\C, 0  
, 3.4461728694, -2.661161575, -3.0137869901\Br, 0, 4.5417608553, -3.72693117  
67, -4.1406771157\C, 0, 2.3762053777, -3.2466968353, -2.3515923602\H, 0, 2.17  
16502675, -4.2992679783, -2.4662985239\C, 0, 1.5810772704, -2.4674313856, -1  
.5248578336\H, 0, 0.758802249, -2.9176730493, -0.9898647562\\Version=EM64L  
-G09RevD.01\HF=-11781.4041041\S2=0.774777\S2-1=0.\S2A=0.750401\RMSD=1.  
611e-09\Dipole=-0.0027809, -0.0168931, 0.0039737\Quadrupole=74.8697035, -  
36.2148223, -38.6548812, 2.9670235, 17.284988, -3.1289354\PG=C01 [X(C36H24  
Br4N2)]\@

## 1 Cation Radical

```
1\1\GINC-HPC-CN116\Stability\UBLYP\6-31G(d)\C18H11Br4N1(1+,2)\TALIPOVM
\27-Feb-2015\0\#\#P BLYP IOP(3/76=0600004000)/6-31G(d) stable(opt) pop(
nbo) scrf(check) guess(read) geom(allcheck) nosym scf(fermi,xqc,maxcyc
=200) int(grid=ultrafine)\Title\1,2\N,0,0.0124103599,-0.0289898284,0
.0602298815\C,0,1.4115364712,-0.0239510615,0.027520718\C,0,2.142738925
7,0.8324345841,0.8684548691\H,0,1.630861894,1.5175004872,1.5250941767\
C,0,3.5214716894,0.8335414048,0.8136984492\H,0,4.0876337744,1.50247586
67,1.441300039\C,0,4.1744684503,-0.0187680711,-0.0748330646\Br,0,6.056
627427,-0.0151606607,-0.1461192402\C,0,3.4599570366,-0.8692217676,-0.9
17801491\H,0,3.9800797556,-1.530316755,-1.5917523842\C,0,2.0818485773,
-0.8677030888,-0.8738874591\C,0,-0.6972847724,0.1529052566,1.242260126
\C,0,-0.1798496978,-0.3224642945,2.463235609\H,0,0.7521510115,-0.86362
14937,2.4839514539\C,0,-0.8960587753,-0.148213201,3.6270648832\H,0,-0.
5126803696,-0.5269956895,4.5605805009\C,0,-2.1313890302,0.4985697566,3
.5847964536\Br,0,-3.1041037063,0.7405503896,5.1763897024\C,0,-2.661007
5142,0.9646376955,2.3803838911\H,0,-3.6130647407,1.469900445,2.3658178
904\C,0,-1.9530802761,0.7876296451,1.2125384106\H,0,-2.347035255,1.167
8301906,0.2839448111\C,0,-0.6860321281,-0.1686958766,-1.1719659991\C,0
,-1.6161786537,-1.1932869632,-1.3915668538\Br,0,-1.9387318647,-2.53134
35454,-0.100899187\C,0,-2.2801110295,-1.2775075552,-2.6043939166\H,0,-
2.9864474773,-2.072292112,-2.7765774198\C,0,-2.0124984841,-0.342331882
7,-3.595856234\Br,0,-2.9292891348,-0.4619679059,-5.2415775486\C,0,-1.0
804309247,0.6698047403,-3.4024279759\H,0,-0.8814970399,1.3893538081,-4
.1795714859\C,0,-0.4174350094,0.7466230174,-2.1923007039\H,0,0.2979182
607,1.535086453,-2.0174241958\H,0,1.5212722501,-1.5401919878,-1.502936
7062\Version=EM64L-G09RevD.01\HF=-11033.3095455\S2=0.799597\S2-1=0.\S
2A=0.752327\RMSD=3.931e-09\Dipole=0.7377384,0.9617989,0.3341703\Quadru
pole=3.1257612,-8.8529066,5.7271454,-0.9415046,0.0975285,1.2880656\PG=
C01 [X(C18H11Br4N1)]\@\
```

## 2 Cation Radical

```
1\1\GINC-HPC-CN118\Stability\UBLYP\6-31G(d)\C18H10Br5N1(1+,2)\TALIPOVM
\27-Feb-2015\0\#\#P BLYP IOP(3/76=0600004000)/6-31G(d) stable(opt) pop(
nbo) scrf(check) guess(read) geom(allcheck) nosym scf(fermi,xqc,maxcyc
=200) int(grid=ultrafine)\Title\1,2\N,0,0.059160922,-0.1093020788,0.
0469278998\C,0,1.4266812962,-0.0166250247,0.0134414003\C,0,2.124321269
```



,0.7256073863,0.9986763511\H,0,1.5788105201,1.2532505932,1.7637691666\  
C,0,3.4917676384,0.8180045598,0.9461573539\H,0,4.0250336293,1.40112446  
,1.6790908246\C,0,4.1931721028,0.1659950026,-0.0768906013\Br,0,6.06024  
00377,0.289946799,-0.1349008845\C,0,3.5210174478,-0.5752616734,-1.0559  
042847\H,0,4.077380565,-1.0854365988,-1.8251803791\C,0,2.1517762476,-0  
.6643336601,-1.0180748338\C,0,-0.680755881,0.1238999254,1.2380843856\C  
,0,-0.4388744223,-0.580420217,2.427650619\Br,0,0.8173450592,-1.9828880  
572,2.5195607583\C,0,-1.1867454793,-0.3065929649,3.559672111\H,0,-1.00  
67080003,-0.8587477488,4.4667212923\C,0,-2.1799679706,0.6630959433,3.5  
071185664\Br,0,-3.1859868151,1.0315877578,5.0601725201\C,0,-2.44940488  
78,1.3551487579,2.3329862861\H,0,-3.2231497184,2.10469023,2.3020753325  
\C,0,-1.7022442799,1.0767053866,1.2047129961\H,0,-1.8906937923,1.61812  
21869,0.2909597695\C,0,-0.6679219582,-0.2816355599,-1.1666584767\C,0,-  
1.5682469297,-1.3381591229,-1.3482689029\Br,0,-1.7712830131,-2.6884707  
732,-0.0485370255\C,0,-2.2867215929,-1.4404878665,-2.5276351806\H,0,-2  
.9709827042,-2.260027804,-2.6709317149\C,0,-2.1019454018,-0.4909284735  
, -3.5249904209\Br,0,-3.0942546345,-0.6358482686,-5.1243065105\C,0,-1.1  
999688006,0.5537387636,-3.3698356641\H,0,-1.0656844996,1.2851156358,-4  
.1498484888\C,0,-0.4842003759,0.65066167,-2.1907503527\H,0,0.204512134  
9,1.4685176108,-2.0435252593\H,0,1.6313522876,-1.2642467768,-1.7461386  
529\\Version=EM64L-G09RevD.01\HF=-13604.3650606\S2=0.793807\S2-1=0.\S2  
A=0.751658\RMSD=1.901e-09\Dipole=1.3677863,1.5413947,-0.8558761\Quadru  
pole=7.2866676,-9.1534437,1.8667761,-0.7625947,-0.5279036,1.7831215\PG  
=C01 [X(C18H10Br5N1)]\ \@

### 3 Cation Radical

1\1\GINC-HPC-CN119\Stability\UBLYP\6-31G(d)\C18H9Br6N1(1+,2)\TALIPOVM\  
27-Feb-2015\0\#\#P BLYP IOP(3/76=0600004000)/6-31G(d) stable(opt) pop(n  
bo) scrf(check) guess(read) geom(allcheck) nosym scf(fermi,xqc,maxcyc=  
200) int(grid=ultrafine)\Title\1,2\N,0,0.011564937,-0.1412758293,0.0  
24698473\C,0,1.4100721289,-0.0249210136,0.0035751571\C,0,2.0113189125,  
1.0176860838,0.7246208349\H,0,1.3881173103,1.7166846833,1.2599231363\C  
,0,3.3789260598,1.1892056997,0.7074382967\H,0,3.8324471485,2.008326835  
,1.2408498215\C,0,4.1627616301,0.3020688632,-0.0255114077\Br,0,6.02979  
34045,0.5280234822,-0.067224274\C,0,3.5939868157,-0.7621132693,-0.7205  
599573\H,0,4.2172092238,-1.4666003198,-1.2454254525\C,0,2.2240254361,-  
0.9319498949,-0.7038684804\C,0,-0.6833920507,0.0444095736,1.229577075\  
C,0,-0.3516596255,-0.6660548973,2.4005499818\Br,0,0.9098496797,-2.0626

13296,2.3747026878\C,0,-1.04501722,-0.4299174881,3.5706760004\H,0,-0.8046761841,-0.9873455039,4.4604638\C,0,-2.0774904565,0.504542209,3.5810311952\Br,0,-3.0036140942,0.8252432063,5.1864900207\C,0,-2.442536295,1.1926538801,2.4268813495\H,0,-3.2430889582,1.9136855428,2.4493805737\C,0,-1.7508157341,0.9543183218,1.2586736854\H,0,-1.9983886525,1.5037884845,0.3640288145\C,0,-0.6989662286,-0.2273440174,-1.1820422506\C,0,-1.7657221655,-1.1317431315,-1.3573758721\Br,0,-2.1672379918,-2.43558933,-0.0604796992\C,0,-2.4586458297,-1.1591793966,-2.550950441\H,0,-3.26183307,-1.8630665211,-2.6912053874\C,0,-2.0872453464,-0.2986021551,-3.5809010627\Br,0,-3.0484781451,-0.3390580754,-5.197021083\C,0,-1.0131723391,0.5765327081,-3.4408926173\H,0,-0.7360096093,1.236168402,-4.2466962962\C,0,-0.3217491478,0.6026044613,-2.2487978399\H,0,0.4914307617,1.2983950563,-2.1138229423\Br,0,1.5050256955,-2.4811433536,-1.4953958399\Version=EM64L-G09RevD.01\HF=-16175.4184626\S2=0.792901\S2-1=0.\S2A=0.751793\RMSD=4.163e-09\Dipole=-0.0722546,2.055044,-0.2422459\Quadrupole=4.4641838,-8.8036655,4.3394817,0.4357642,-0.024532,1.4967178\PG=C01 [X(C18H9Br6N1)]\@\

#### 4 Cation Radical

1\1\GINC-HPC-CN10\Stability\UBLYP\6-31G(d)\C18H10Br3N1(1+,2)\TALIPOVM\07-Jan-2015\0\#\#P BLYP IOP(3/76=0600004000)/6-31G(d) stable(opt) pop(nbo) scrf(check) guess(read) geom(allcheck) nosym scf(fermi,xqc,maxcyc=200) int(grid=ultrafine)\Title\1,2\N,0,-0.1392697746,0.0217333371,0.261874543\C,0,1.2258782093,0.199996653,0.1095946497\C,0,2.1743080081,0.5680414826,1.0635657353\H,0,1.9087122389,0.7505704192,2.0920179126\C,0,3.487368551,0.7064963007,0.6414881825\H,0,4.2524177941,0.9850117427,1.3474414621\C,0,3.8217995814,0.4963221696,-0.696381828\Br,0,5.613285524,0.6947571589,-1.2355432171\C,0,2.8640163239,0.1537827495,-1.6634787446\H,0,3.1541854294,0.0169408381,-2.6927567891\C,0,1.5615128875,0.0109492948,-1.2499820351\C,0,-0.8478876976,0.1276204743,1.4843383745\C,0,-0.4195088298,-0.6027395175,2.592902381\H,0,0.4246167843,-1.2701213796,2.5156230719\C,0,-1.1157524316,-0.5006797057,3.7851260086\H,0,-0.8035685111,-1.0715990743,4.6445616443\C,0,-2.2262157204,0.3325478671,3.8583944778\Br,0,-3.1733941145,0.4721761854,5.4884533206\C,0,-2.6541478828,1.0649513601,2.7569592429\H,0,-3.5095134707,1.7166166954,2.8328475618\C,0,-1.9639513108,0.9608332,1.5614135192\H,0,-2.2675739069,1.5484377266,0.7091061645\C,0,-0.7036407703,-0.2775024535,-0.9673850501\C,0,-2.0295437236,-0.5830734525,-1.2731444662\H,0,-2.7988164247,-0.6066131767

, -0.51867115\C, 0, -2.3322635481, -0.8719203642, -2.5946464667\H, 0, -3.3458  
025774, -1.108467951, -2.8740976315\C, 0, -1.328618729, -0.8669636901, -3.56  
34052298\Br, 0, -1.7749235355, -1.2643134438, -5.3475489269\C, 0, 0.01126803  
54, -0.5872861428, -3.2526847366\H, 0, 0.7653244168, -0.6092602151, -4.02305  
78393\C, 0, 0.316399147, -0.2956450885, -1.9450341413\\Version=EM64L-G09Re  
vD.01\HF=-8461.0705649\S2=0.797075\S2-1=0.\S2A=0.752007\RMSD=1.941e-09  
\Dipole=-0.0614785, 0.0129333, 0.1174327\Quadrupole=7.4847643, -14.167199  
5, 6.6824351, 0.2474078, 0.4736128, 1.9506668\PG=C01 [X(C18H10Br3N1)]\@

## 5 Cation Radical

1\1\GINC-HPC-CN17\Stability\UBLYP\6-31G(d)\C36H20Br4N2(1+,2)\TALIPOVM\  
27-Feb-2015\0\#\#P BLYP IOP(3/76=0600004000)/6-31G(d) stable(opt) pop(n  
bo) scrf(check) guess(read) geom(allcheck) nosym scf(fermi,xqc,maxcyc=  
200) int(grid=ultrafine)\Title\1,2\N,0,-8.8139961036,-0.1758982829,-  
1.2977513168\C,0,-7.4136507136,-0.1919499972,-1.1870635804\C,0,-6.7809  
263481,0.5923766901,-0.2159627664\H,0,-7.3603646762,1.2519201226,0.410  
8132444\C,0,-5.4052486523,0.5749568659,-0.1176246159\H,0,-4.92905642,1  
.223688634,0.6006495104\C,0,-4.6220446093,-0.2274950915,-0.9631129334\  
C,0,-5.2803507604,-1.0101979009,-1.9255413551\H,0,-4.7124848925,-1.671  
5074488,-2.561033748\C,0,-6.6541745661,-0.9926093619,-2.0479163545\H,0  
, -7.1426246096,-1.637845416,-2.7612048509\C,0,-9.709883593,-0.29241098  
02,-0.2392918316\C,0,-9.449835019,-0.5140905868,1.1113876821\H,0,-8.44  
68050063,-0.6098560867,1.4927345274\C,0,-10.5363613926,-0.627098623,1.  
9657911054\H,0,-10.3760823397,-0.7912946294,3.0187674757\C,0,-11.83521  
03621,-0.5429996024,1.4664679439\Br,0,-13.2880567762,-0.7059283357,2.6  
563206084\C,0,-12.1002268771,-0.3587547816,0.1040778892\H,0,-13.116700  
0651,-0.3259843083,-0.2535191385\C,0,-11.0252782548,-0.2357968852,-0.7  
468430534\C,0,-9.5293376413,-0.0428914583,-2.4838645044\C,0,-10.909144  
7711,-0.0745436115,-2.190899329\C,0,-11.8336323826,0.066380415,-3.2011  
392911\H,0,-12.8944162609,0.0512156181,-3.0090090396\C,0,-11.352686226  
1,0.2439053232,-4.5040945167\Br,0,-12.5938306491,0.4289635136,-5.91071  
93019\C,0,-9.9898332368,0.3048081189,-4.7909512072\H,0,-9.6618478285,0  
.4651278671,-5.8048289918\C,0,-9.0544717672,0.1729926364,-3.7756760237  
\H,0,-8.0021390973,0.2511010208,-3.9928637655\N,0,1.0507250607,-0.3012  
831901,-0.4985708988\C,0,-0.3571189747,-0.2840975506,-0.6137989801\C,0  
, -1.1515973603,-0.0880996673,0.5152595102\H,0,-0.6892889785,0.02005470  
83,1.4845492418\C,0,-2.5302411529,-0.0602363756,0.3967892779\H,0,-3.12  
58965991,0.0660188031,1.2882268122\C,0,-3.1539147475,-0.2475878863,-0.

8431596471\C,0,-2.3417396119,-0.4544383058,-1.9652142891\H,0,-2.787302  
239,-0.5672662816,-2.9419751814\C,0,-0.9619620737,-0.4626043015,-1.857  
4497209\H,0,-0.3509990312,-0.585218793,-2.7387366477\C,0,1.8331405646,  
0.692665488,0.082883819\C,0,1.4505417067,1.9111112031,0.6369834209\H,0  
,0.4163155405,2.2141259629,0.6805821427\C,0,2.4421334351,2.7414122319,  
1.1332981296\H,0,2.1776655351,3.6913155103,1.570405629\C,0,3.784186171  
6,2.358070016,1.0682095699\Br,0,5.1086559778,3.5373212511,1.7703873207  
\C,0,4.1785213438,1.1582444817,0.5079690943\H,0,5.2219467171,0.8883468  
908,0.4588802405\C,0,3.1886904239,0.3162507656,0.005670165\C,0,1.89360  
44286,-1.3139207731,-0.9482926818\C,0,3.2272036218,-0.9690717443,-0.65  
19037663\C,0,4.2655002166,-1.8344393861,-0.9897122272\H,0,5.293203421,  
-1.58892284,-0.7716504914\C,0,3.9393475999,-3.0252059031,-1.6099217242  
\Br,0,5.3323690126,-4.2356064332,-2.0920167694\C,0,2.6170189588,-3.377  
0972759,-1.8925599964\H,0,2.4048824619,-4.3208416667,-2.3697016328\C,0  
,1.5776345397,-2.5235775225,-1.5606056714\H,0,0.5574059296,-2.80241485  
34,-1.7722025193\\Version=EM64L-G09RevD.01\HF=-11779.0431166\S2=0.7945  
16\S2-1=0.\S2A=0.751878\RMSD=1.519e-09\Dipole=-9.8308622,0.1253218,-0.  
7987888\Quadrupole=172.2553734,-102.7765458,-69.4788276,5.8331971,39.0  
006511,2.0212299\PG=C01 [X(C36H20Br4N2)]\@

## 6 Cation Radical

1\1\GINC-HPC-CN116\Stability\UBLYP\6-31G(d)\C36H23Br5N2(1+,2)\TALIPVM  
\26-Feb-2015\0\#\P BLYP IOP(3/76=0600004000)/6-31G(d) stable(opt) pop(  
nbo) scrf(check) guess(read) geom(allcheck) nosym scf(fermi,xqc,maxcyc  
=200) int(grid=ultrafine)\Title\1,2\N,0,-8.8030498147,-0.1790660885,  
-1.2807824952\C,0,-7.4372725448,-0.2018498233,-1.1127297983\C,0,-6.803  
8315512,0.6981917116,-0.2241816751\H,0,-7.3878969465,1.4510030318,0.27  
95745069\C,0,-5.4448317369,0.6633363382,-0.0519433409\H,0,-4.986437275  
8,1.3911739648,0.595222374\C,0,-4.6354971506,-0.2628380987,-0.74803646  
1\C,0,-5.2792516146,-1.1417610612,-1.6482054588\H,0,-4.6977589215,-1.8  
874255928,-2.1673250098\C,0,-6.6377643273,-1.1237825171,-1.8280590325\  
H,0,-7.1035016891,-1.8479266387,-2.4761581506\C,0,-9.6605040965,0.2781  
904888,-0.2452207427\C,0,-9.4696023645,-0.1629088129,1.0662414949\H,0,  
-8.6789459231,-0.8607797793,1.2941556135\C,0,-10.3155522144,0.27479011  
33,2.071311019\H,0,-10.1788392909,-0.0710698504,3.0832933556\C,0,-11.3  
496941964,1.1485952313,1.7591091595\Br,0,-12.5083247485,1.7465155684,3  
.132171607\C,0,-11.5529451118,1.5884933492,0.4558824847\H,0,-12.355901  
2944,2.2714626651,0.2296314403\C,0,-10.7089506004,1.1495394394,-0.5491

394486\H,0,-10.8509195489,1.4956642964,-1.560964792\C,0,-9.3972495417,  
-0.6155169572,-2.4956880752\C,0,-10.4974271572,-1.4745392127,-2.457266  
0981\H,0,-10.8783036602,-1.8258545085,-1.5108460433\C,0,-11.0845693941  
, -1.8943124577,-3.6381691934\H,0,-11.9259859519,-2.5681160826,-3.61594  
37661\C,0,-10.5736317867,-1.4466145594,-4.8512960598\Br,0,-11.38037929  
43,-2.018109669,-6.466282003\C,0,-9.4854091678,-0.5843635059,-4.900781  
497\H,0,-9.1097939968,-0.232015347,-5.8480075025\C,0,-8.8959226246,-0.  
1666104045,-3.7193276921\H,0,-8.0662197771,0.5228167141,-3.7454527701\  
N,0,1.0537122581,-0.2965975798,-0.5224121041\C,0,-0.3312146941,-0.3069  
069894,-0.5597188275\C,0,-1.0811655522,-0.1384923675,0.6168726191\H,0,  
-0.5794045418,-0.0468389458,1.5648475199\C,0,-2.4578051831,-0.12964822  
43,0.5801581401\Br,0,-3.3253557642,-0.0193324589,2.2737387613\C,0,-3.1  
834748419,-0.2975842089,-0.6166579659\C,0,-2.4038490162,-0.5020294374,  
-1.7739524082\H,0,-2.9075473936,-0.6087868596,-2.7225210245\C,0,-1.029  
9961412,-0.49786437,-1.7643750074\H,0,-0.4905729051,-0.6155608912,-2.6  
897133069\C,0,1.7585602427,0.3761455828,0.5161213427\C,0,1.4712716956,  
1.7072254569,0.8176504442\H,0,0.7068719878,2.2321876753,0.2647707812\C  
,0,2.1681978775,2.3635749729,1.821310812\H,0,1.9461404679,3.3934160899  
,2.05237181\C,0,3.1652862693,1.6874179676,2.5098857529\Br,0,4.13074991  
26,2.5870422534,3.8788263292\C,0,3.4716869858,0.3667091658,2.214249175  
9\H,0,4.246595746,-0.1495762794,2.7585414114\C,0,2.7620606953,-0.28876  
24943,1.219081461\H,0,2.9871815479,-1.3191436747,0.9892032947\C,0,1.81  
86844713,-0.968086015,-1.5185519177\C,0,2.8487863334,-0.2952981895,-2.  
1737503855\H,0,3.0492958114,0.7391995334,-1.9393798131\C,0,3.615938388  
2,-0.9481751779,-3.1270701114\H,0,4.4115744645,-0.4260202977,-3.634631  
6479\C,0,3.3405805686,-2.2743705044,-3.4289354073\Br,0,4.3850624463,-3  
.1705631696,-4.7410343177\C,0,2.3179668891,-2.9584640277,-2.7872848052  
\H,0,2.1205713481,-3.9925358307,-3.0219515592\C,0,1.5630246571,-2.3043  
252474,-1.8248613781\H,0,0.777760284,-2.8349574021,-1.3077436177\\Vers  
ion=EM64L-G09RevD.01\HF=-14352.4584426\S2=0.78582\S2-1=0.\S2A=0.751167  
\RMSD=5.009e-09\Dipole=-4.3908464,-0.0618096,-1.266817\Quadrupole=125.  
6250908,-63.6956504,-61.9294404,4.2599897,31.0531704,-2.0389486\PG=C01  
[X(C36H23Br5N2)]\@

## 7 Cation Radical

1\1\GINC-HPC-CN35\Stability\UBLYP\6-31G(d)\C36H23Br5N2(1+,2)\TALIP0VM\  
05-Aug-2015\0\#\#P BLYP IOP(3/76=0600004000)/6-31G(d) stable(opt) pop(n  
bo) scrf(check) guess(read) geom(allcheck) nosym scf(fermi,xqc,maxcyc=

200) int(grid=ultrafine)\Title\1,2\N,0,-8.7859190432,-0.1546341487,-  
1.2930176832\C,0,-7.4116453786,-0.187222188,-1.1573732531\C,0,-6.78190  
89877,0.4384466517,-0.0585166713\H,0,-7.3717322678,0.9888843995,0.6563  
078833\C,0,-5.4158815978,0.4029703294,0.0644432421\H,0,-4.9602069709,0  
.9357531719,0.8837481847\C,0,-4.6042042652,-0.257367977,-0.8823597427\  
C,0,-5.2482940691,-0.8807327448,-1.9721309378\C,0,-6.6121533794,-0.847  
7521736,-2.1163568133\H,0,-7.0787662768,-1.3724454554,-2.9340036076\C,  
0,-9.6273753597,-0.0913226215,-0.1552320921\C,0,-9.3676747727,-0.90277  
81498,0.9535667383\H,0,-8.5385538133,-1.5929177187,0.9398370897\C,0,-1  
0.1993511147,-0.8456022165,2.0579878415\H,0,-10.0119714768,-1.47847805  
37,2.9103709001\C,0,-11.286209475,0.0212400053,2.0499185228\Br,0,-12.4  
229879813,0.0990263255,3.5594855276\C,0,-11.5564345229,0.8291728113,0.  
9501501996\H,0,-12.3986289492,1.5021029264,0.9615421905\C,0,-10.728745  
7882,0.7701377959,-0.1561184977\H,0,-10.9206030073,1.4040337,-1.007535  
1394\C,0,-9.3870941457,-0.1850120927,-2.5762976744\C,0,-10.4937062287,  
-1.0083658709,-2.8039793046\H,0,-10.8725349679,-1.6392507892,-2.015256  
4808\C,0,-11.0847762399,-1.0349265023,-4.0541092688\H,0,-11.9288342196  
, -1.6791150107,-4.2407722865\C,0,-10.5742352854,-0.2320273731,-5.06891  
41859\Br,0,-11.3875084057,-0.2660397327,-6.7762421976\C,0,-9.480452879  
2,0.5977825791,-4.8505210555\H,0,-9.1062730771,1.227683125,-5.64139406  
78\C,0,-8.8847965878,0.6217452492,-3.6017154389\H,0,-8.0526953324,1.28  
25460491,-3.4146602939\N,0,1.072020644,-0.3842841086,-0.3482576979\C,0  
, -0.3269326527,-0.3572290339,-0.4539361024\C,0,-1.1728871509,-0.237279  
2442,0.6611702072\Br,0,-0.4655680435,-0.2154699622,2.4197317444\C,0,-2  
.5455673382,-0.1895577017,0.5190557801\C,0,-3.1493699027,-0.295703722,  
-0.7418453056\C,0,-2.3075142182,-0.4485389065,-1.8554994549\H,0,-2.723  
4417554,-0.4992610997,-2.8495507505\C,0,-0.9376760571,-0.4696436763,-1  
.7111502903\H,0,-0.3082524907,-0.5535406711,-2.583591247\C,0,1.7648229  
563,0.6816545183,0.2773683572\C,0,1.2809100916,1.9870931955,0.20194845  
93\H,0,0.3785390534,2.1985420378,-0.3513947944\C,0,1.9553114999,3.0250  
252767,0.8299506816\H,0,1.5752863297,4.0327349867,0.7679193312\C,0,3.1  
272499954,2.7572610689,1.5191560914\Br,0,4.0633856759,4.1790028452,2.3  
707524223\C,0,3.6292792884,1.4647206521,1.5962671317\H,0,4.5383231151,  
1.2639499551,2.1412559578\C,0,2.9426683852,0.4295365694,0.9839687689\H  
,0,3.3175574969,-0.5795598623,1.0606070795\C,0,1.7891709482,-1.3468193  
625,-1.1065562539\C,0,2.8615247142,-0.9742696766,-1.9176317778\H,0,3.1  
557406448,0.0620669127,-1.9809369898\C,0,3.5537299962,-1.9298371797,-2  
.6472452673\H,0,4.3817752498,-1.6377484139,-3.2738431151\C,0,3.1604347

544, -3.2583731002, -2.5770827686\Br, 0, 4.1019535938, -4.5690075204, -3.5853581253\C, 0, 2.0922046807, -3.6463537745, -1.7809294752\H, 0, 1.8004467776, -4.6833058966, -1.7248058573\C, 0, 1.4149833652, -2.6897955033, -1.0403348301\H, 0, 0.5973753628, -2.9861698271, -0.4005283467\H, 0, -4.6696320313, -1.440186541, -2.6894888728\H, 0, -3.1493471116, -0.1252175344, 1.4093236828\\Version=EM64L-G09RevD.01\HF=-14352.4586894\S2=0.796361\S2-1=0.\S2A=0.752052\RMSD=6.375e-09\Dipole=-7.2624387, -0.0975202, -1.481826\Quadrupole=148.1372831, -81.2267354, -66.9105477, 3.6481436, 33.4349545, -6.0083987\PG=C01 [X(C36H23Br5N2)]\@\

## 8 Cation Radical

1\1\GINC-HPC-CN4\Stability\UBLYP\6-31G(d)\C36H22Br6N2(1+,2)\TALIPOVM\06-Aug-2015\0\#\#P BLYP IOP(3/76=0600004000)/6-31G(d) stable(opt) pop(nbo) scrf(check) guess(read) geom(allcheck) nosym scf(fermi,xqc,maxcyc=200) int(grid=ultrafine)\Title\1,2\N,0, -8.8281994578, -0.3557664458, -1.291542406\C, 0, -7.4239816882, -0.3814683467, -1.167545511\C, 0, -6.7517586912, 0.6927046158, -0.5756597997\H, 0, -7.3294978288, 1.5393593674, -0.2371760918\C, 0, -5.3777344367, 0.6968222694, -0.4353783473\H, 0, -4.8996731671, 1.5610139431, 0.0005773749\C, 0, -4.6076693645, -0.374192011, -0.903528557\C, 0, -5.2705790302, -1.454135512, -1.493013769\C, 0, -6.6496678117, -1.4639277041, -1.6044890555\Br, 0, -7.4770978189, -3.0148134636, -2.3137966462\C, 0, -9.5954303975, -0.0243623166, -0.1459093016\C, 0, -9.3502574648, -0.6859898844, 1.0584142166\H, 0, -8.5968631012, -1.4583879913, 1.0986866326\C, 0, -10.0727486015, -0.3671791261, 2.1981478308\H, 0, -9.8793612189, -0.8832446832, 3.1255114757\C, 0, -11.0591654856, 0.6059012796, 2.1272345407\Br, 0, -12.0637382126, 1.0385428033, 3.6854974037\C, 0, -11.3253915794, 1.2668571058, 0.937104639\H, 0, -12.0899883761, 2.0266395239, 0.893482236\C, 0, -10.5864323764, 0.9569411799, -0.1955322694\H, 0, -10.781149974, 1.4806794675, -1.1188490014\C, 0, -9.4278943259, -0.4065171999, -2.5711832782\C, 0, -10.6844184142, -0.9957276133, -2.7348447447\H, 0, -11.1961476409, -1.4157388426, -1.8826235672\C, 0, -11.2775789766, -1.0542876584, -3.9851106501\H, 0, -12.247944433, -1.5109297425, -4.1022262351\C, 0, -10.6054672493, -0.5404571443, -5.0859480397\Br, 0, -11.4140898575, -0.6324634132, -6.8077958406\C, 0, -9.3540958402, 0.0372748296, -4.9462680392\H, 0, -8.8388519964, 0.4401252932, -5.8042718382\C, 0, -8.7720270263, 0.1113229944, -3.6882598704\H, 0, -7.8051407636, 0.5784507395, -3.5796229933\N, 0, 1.0759113736, -0.3331237459, -0.4745893342\C, 0, -0.3358469967, -0.3403028164, -0.5352460082\C, 0, -1.1432199092, 0.2744203445, 0.4363720679\Br, 0, -0.4081424777, 1.0404879181, 2.0006223485\C, 0, -2.51

79370371,0.2526924825,0.309068202\C,0,-3.1396239753,-0.3752673907,-0.7  
787281338\C,0,-2.3274774799,-1.0051004562,-1.7322906322\H,0,-2.7699626  
192,-1.473722801,-2.5969237242\C,0,-0.9554745302,-0.9947599474,-1.6080  
275785\H,0,-0.3394383571,-1.4544265671,-2.3652604082\C,0,1.7684467959,  
0.8733926972,-0.3533957297\C,0,1.2383565561,2.0421410697,-0.9245832272  
\H,0,0.320783285,2.0012612111,-1.4894076437\C,0,1.9151637932,3.2365053  
719,-0.7978590604\H,0,1.5230274747,4.1329821191,-1.250176936\C,0,3.117  
4503574,3.2736390067,-0.092693069\Br,0,4.0348684228,4.9094542103,0.084  
8779008\C,0,3.6506897039,2.1228441165,0.4857408586\H,0,4.5710395133,2.  
1716427941,1.044819834\C,0,2.9803091016,0.924761695,0.3571011279\H,0,3  
.3641862472,0.0398125854,0.8384065765\C,0,1.7562023742,-1.5511315528,-  
0.6117431757\C,0,2.9488304594,-1.6210964531,-1.3496538933\H,0,3.335162  
8537,-0.7431035104,-1.8419758669\C,0,3.6020586195,-2.8295340488,-1.484  
2618341\H,0,4.5078739551,-2.8938900342,-2.0651173904\C,0,3.0705477416,  
-3.9680102782,-0.8820419943\Br,0,3.966375015,-5.6163185871,-1.06724759  
06\C,0,1.8865482344,-3.9119445644,-0.1492475548\H,0,1.4952599452,-4.79  
94051826,0.3211968333\C,0,1.2260521589,-2.7076580358,-0.0179377982\H,0  
,0.3239711342,-2.6476483592,0.5698046754\H,0,-4.7185719178,-2.31900555  
67,-1.8242250882\H,0,-3.1141772088,0.6937259525,1.0906927498\\Version=  
EM64L-G09RevD.01\HF=-16923.512392\S2=0.798687\S2-1=0.\S2A=0.752307\RMS  
D=5.149e-09\Dipole=8.925654,0.2991257,0.5107339\Quadrupole=7.7208343,8  
.3421129,-16.0629471,-7.035331,-7.0268609,-3.4427337\PG=C01 [X(C36H22B  
r6N2)]\@

## 9 Cation Radical

1\1\GINC-HPC-CN120\Stability\UBLYP\6-31G(d)\C36H22Br6N2(1+,2)\TALIPOVM  
\28-Feb-2015\0\#\#P BLYP IOP(3/76=0600004000)/6-31G(d) stable(opt) pop(  
nbo) scrf(check) guess(read) geom(allcheck) nosym scf(fermi,xqc,maxcyc  
=200) int(grid=ultrafine)\Title\1,2\N,0,-8.8007369443,-0.1709317355,  
-1.2716000186\C,0,-7.4150979194,-0.2594969741,-1.1197197935\C,0,-6.709  
9536061,0.66749093,-0.3400344956\H,0,-7.2339809696,1.4779580526,0.1402  
713416\C,0,-5.3428091527,0.5605475582,-0.1962794029\H,0,-4.8240666424,  
1.2969673766,0.3981419146\C,0,-4.5980565159,-0.4443711832,-0.829509501  
2\C,0,-5.3217959818,-1.3575898138,-1.6038103233\Br,0,-4.4513329013,-2.  
8256428578,-2.4528094511\C,0,-6.6945275731,-1.285962155,-1.7424847161\  
H,0,-7.2087502523,-2.0350356636,-2.3204339196\C,0,-9.6101727067,0.3765  
823661,-0.2400056738\C,0,-9.4585739074,-0.0458179831,1.0811377935\H,0,  
-8.7193055751,-0.7937566939,1.325103586\C,0,-10.2545109735,0.485892135



9, 2.0850606367\H, 0, -10.1344569742, 0.1555140911, 3.1048810078\C, 0, -11.2183055005, 1.4296066099, 1.7604933613\Br, 0, -12.3209168134, 2.1526014141, 3.1328991693\C, 0, -11.3921207147, 1.8528582387, 0.4508508249\H, 0, -12.1417018721, 2.590036407, 0.2095636327\C, 0, -10.5813557397, 1.3298837515, -0.5458134614\H, 0, -10.7034695685, 1.6636344188, -1.5651551275\C, 0, -9.4355404818, -0.6434530663, -2.4519158365\C, 0, -10.5484194917, -1.4792737004, -2.3618831823\H, 0, -10.9154525311, -1.78160982, -1.3927665788\C, 0, -11.1877729378, -1.9252959326, -3.5093729899\H, 0, -12.0480028525, -2.571794915, -3.4347934964\C, 0, -10.7004247176, -1.5441397745, -4.750950152\Br, 0, -11.5677183788, -2.1622776303, -6.3280328613\C, 0, -9.5915804536, -0.7174468103, -4.8610166613\H, 0, -9.2266916171, -0.418625865, -5.8311550643\C, 0, -8.9673086503, -0.2611000824, -3.7095866327\H, 0, -8.1153183083, 0.3972655527, -3.7886523459\N, 0, 1.0814305827, -0.2911809185, -0.5256965984\C, 0, -0.3133713908, -0.3430805327, -0.5946981556\C, 0, -1.0677879191, -0.4362308431, 0.5837617212\H, 0, -0.5760030204, -0.5139534354, 1.5388090458\C, 0, -2.4441756591, -0.4907186936, 0.511963765\Br, 0, -3.3807940104, -0.7017497007, 2.1477781381\C, 0, -3.1267410599, -0.4512281703, -0.7171501625\C, 0, -2.340685677, -0.3616445652, -1.8797745022\H, 0, -2.8370567116, -0.3026086596, -2.8350339507\C, 0, -0.9669898507, -0.3088810255, -1.8370295469\H, 0, -0.3998698732, -0.1938116261, -2.7465489524\C, 0, 1.714718336, 0.3949216803, 0.5283087913\C, 0, 1.1980164354, 1.6181470445, 0.977776764\H, 0, 0.3341942051, 2.0514574559, 0.4990928125\C, 0, 1.8241098252, 2.2911279747, 2.0089939186\H, 0, 1.4410941224, 3.2401753677, 2.3476102172\C, 0, 2.9613729714, 1.7417255676, 2.5944601529\Br, 0, 3.8124622829, 2.6615145314, 4.0056169113\C, 0, 3.4833555524, 0.5271845429, 2.1571047472\H, 0, 4.3566149251, 0.1075307159, 2.6297019678\C, 0, 2.8641090197, -0.1452290495, 1.1216522932\H, 0, 3.2474539585, -1.0984148231, 0.793780295\C, 0, 1.861022141, -0.9258439617, -1.5114705689\C, 0, 3.0224509329, -0.3033920737, -1.9899682606\H, 0, 3.3052225169, 0.6715273736, -1.6260012323\C, 0, 3.7841732132, -0.924060486, -2.9605388034\H, 0, 4.6680336107, -0.4419805819, -3.3457579918\C, 0, 3.3924228947, -2.1683856377, -3.4475822709\Br, 0, 4.4373495152, -3.0144856896, -4.7720593285\C, 0, 2.245249614, -2.799808947, -2.9748484138\H, 0, 1.9640086864, -3.7710059201, -3.348765905\C, 0, 1.4770123738, -2.1791111728, -2.009016036\H, 0, 0.6028366817, -2.6744119873, -1.6172124438\\Version=EM64L-G09RevD.01\HF=-16923.5139899\S2=0.799162\S2-1=0.\S2A=0.75237\RMSD=6.384e-09\Dipole=7.7157403, 0.8654373, 0.2256081\Quadrupole=23.2815433, -11.1828478, -12.0986955, -4.7077582, 1.4058481, -0.822846\PG=C01 [X(C36H22Br6N2)]\@

MC, tris(2-bromo-4-(tert-butyl)phenyl)amine, Cation Radical  
1\1\GINC-HPC-CN85\Stability\UBLYP\6-31G(d)\C30H36Br3N1(1+,2)\TALIPOVM\  
27-Mar-2015\0\#\#P BLYP IOP(3/76=0600004000)/6-31G(d) stable(opt) pop(n  
pa) scrf(check) guess(read) geom(allcheck) nosym scf(fermi,xqc,maxcyc=  
200) int(grid=ultrafine)\Title\1,2\N,0,0.0182808139,-0.3186067986,0.  
0170389972\C,0,1.4175039247,-0.2363241242,0.0057776816\C,0,2.047509245  
8,0.7711887332,0.7532928241\H,0,1.4390523306,1.4716288215,1.3040960433  
\C,0,3.416878496,0.9017846536,0.7386652025\H,0,3.8618142715,1.70537097  
18,1.3039817655\C,0,4.2285365899,0.0305609573,-0.006311921\C,0,5.74578  
4311,0.2126808551,-0.0095591235\C,0,3.5956103238,-0.9936048203,-0.7182  
938761\H,0,4.1752205322,-1.7153387594,-1.2668169746\C,0,2.2209760242,-  
1.1367127231,-0.714173394\Br,0,1.4771979475,-2.6590193723,-1.546794159  
4\C,0,-0.6813824349,-0.13184197,1.2194185494\C,0,-0.3854593646,-0.8608  
400486,2.3866928318\Br,0,0.8474999656,-2.2912514113,2.3561052294\C,0,-  
1.0880302982,-0.621075486,3.546518672\H,0,-0.8511066377,-1.2146605084,  
4.4143468571\C,0,-2.1125121464,0.3377895396,3.6070822583\C,0,-2.851531  
1503,0.564535536,4.9257863648\C,0,-2.4165904487,1.0344837238,2.4331524  
429\H,0,-3.1930009016,1.7805406385,2.4258907792\C,0,-1.7235733948,0.80  
11577502,1.2615891394\H,0,-1.9515021382,1.3711758419,0.3741091117\C,0,  
-0.6858108835,-0.3721280644,-1.1950697611\C,0,-1.7714306233,-1.2450953  
56,-1.4004515267\Br,0,-2.2200952333,-2.5597401792,-0.1209807678\C,0,-2  
.4453005997,-1.2375824847,-2.6011370839\H,0,-3.2570586531,-1.934463784  
2,-2.7312032218\C,0,-2.0771037739,-0.3813728293,-3.651895769\C,0,-2.86  
75959474,-0.4148142453,-4.9595517435\C,0,-0.9779287649,0.4589701714,-3  
.446716246\H,0,-0.6557859637,1.1354537827,-4.2200238953\C,0,-0.2907349  
193,0.4603824236,-2.2490066552\H,0,0.5343132055,1.139498507,-2.0989065  
413\C,0,-3.9258383503,1.6524341014,4.8075810977\C,0,-1.8384933868,0.99  
39103905,6.0049477008\C,0,-3.5344302446,-0.7499038645,5.3531948669\H,0  
, -4.2548424055,-1.0781318112,4.6038093404\H,0,-4.0673299898,-0.5971415  
199,6.291837668\H,0,-2.8159789514,-1.553884482,5.5073554323\H,0,-3.500  
5252657,2.6161750803,4.5269445184\H,0,-4.4161707542,1.7782567371,5.772  
0394145\H,0,-4.6942926222,1.3888070778,4.0808291327\H,0,-1.3425534929,  
1.9244890283,5.7284046265\H,0,-1.0718083739,0.2383059861,6.1710258178\  
H,0,-2.3561913281,1.1542521576,6.9507610319\C,0,6.4594735296,-0.833893  
6831,-0.8734266214\C,0,6.2691368847,0.094262372,1.4352884448\C,0,6.079  
7220478,1.6117167686,-0.5645490849\H,0,6.0447648005,-0.8869404542,1.85  
37518519\H,0,5.8359634163,0.8491394847,2.0901244521\H,0,7.351003371,0.  
2279402285,1.4448317859\H,0,6.2913855463,-1.8473165245,-0.5086545019\H

,0,7.5326369341,-0.6499595459,-0.8457443035\H,0,6.1451628435,-0.784660  
0799,-1.9162126666\C,0,-2.333953058,0.5939962265,-5.9837060942\C,0,-4.  
3431599887,-0.0799153438,-4.6668865066\C,0,-2.7709952306,-1.8269495244  
, -5.5706527705\H,0,-4.4406219566,0.916562704,-4.2355855041\H,0,-4.7964  
781987,-0.7925412411,-3.9790493011\H,0,-4.9152646523,-0.1049622526,-5.  
5944307647\H,0,-1.7354017273,-2.0896402213,-5.7867837633\H,0,-3.331562  
8848,-1.8602583511,-6.5049880089\H,0,-3.1826907444,-2.5887969749,-4.91  
0053759\H,0,-2.394533355,1.6183266974,-5.6156160717\H,0,-2.9333627467,  
0.5349888569,-6.8912414116\H,0,-1.2999849119,0.3860632662,-6.259237888  
1\H,0,5.7210664293,1.7230900741,-1.5879328129\H,0,7.1602552336,1.75577  
32321,-0.5665672318\H,0,5.6403798793,2.406155462,0.0370997942\\Version  
=EM64L-G09RevD.01\HF=-8933.689125\S2=0.791971\S2-1=0.\S2A=0.751713\RMS  
D=2.681e-09\Dipole=0.0056354,2.5431982,-0.2675492\Quadrupole=12.655923  
5,-24.810657,12.1547336,0.8196207,0.2504295,3.7386474\PG=C01 [X(C30H36  
Br3N1)]\@

Tris(4-(tert-butyl)phenyl)amine Cation Radical

1\1\GINC-HPC-CN128\Stability\UBLYP\6-31G(d)\C30H39N1(1+,2)\TALIPOVM\05  
-Aug-2015\0\#\#P BLYP IOP(3/76=0600004000)/6-31G(d) stable(opt) pop(nbo  
) scrf(check) guess(read) geom(allcheck) nosym scf(fermi,xqc,maxcyc=20  
0) int(grid=ultrafine)\Title\1,2\N,0,0.01002419,0.0375290684,-0.0273  
35456\C,0,1.4147002059,0.0526042626,-0.0212155493\C,0,2.1089733458,0.9  
001380449,0.8557292451\H,0,1.5644464613,1.5659661651,1.5065273199\C,0,  
3.4871408449,0.9087496748,0.8486687166\H,0,3.9949572589,1.5852056651,1  
.5187400593\C,0,4.2317170781,0.0807594394,-0.008438364\C,0,5.759814483  
1,0.1255171268,0.0281485523\C,0,3.5175618868,-0.7595341786,-0.87033341  
55\H,0,4.0403106951,-1.4254674647,-1.5363612007\C,0,2.1346057247,-0.77  
80038489,-0.8881998491\C,0,-0.6981312539,0.1472627879,1.1815529844\C,0  
, -0.2295411626,-0.4963531203,2.3369503821\C,0,-0.9361357765,-0.3834616  
337,3.5149870464\H,0,-0.5645419695,-0.9054801043,4.3832495334\C,0,-2.1  
177218348,0.3715686726,3.6040417045\C,0,-2.8595134197,0.4693020685,4.9  
376164559\C,0,-2.563009068,1.0079258325,2.4396844932\H,0,-3.454978254,  
1.6117110687,2.4574958674\C,0,-1.876235421,0.9003968847,1.2437930692\H  
,0,-2.2283899205,1.4241049128,0.3690070906\C,0,-0.6869286495,-0.087372  
9597,-1.240131396\C,0,-1.8566891076,-0.8600337857,-1.3071818933\C,0,-2  
.5279001603,-0.9798095114,-2.5047828137\H,0,-3.4125837634,-1.597079806  
2,-2.532224435\C,0,-2.0836653994,-0.3391585319,-3.6738928848\C,0,-2.86  
84063058,-0.5034251992,-4.9760016266\C,0,-0.9182976777,0.4307373448,-3

.581410677\H,0,-0.5440680627,0.9560448823,-4.4442512774\C,0,-0.2220845  
627,0.557030247,-2.3929931361\H,0,0.657665609,1.1793552178,-2.34558063  
76\C,0,-4.1183803301,1.3397983382,4.8419381299\C,0,-1.921946782,1.0856  
855998,5.9940572477\C,0,-3.2795347088,-0.9441700669,5.386460456\H,0,-3  
.9464648335,-1.4041964676,4.6568721548\H,0,-3.8072681876,-0.8869653297  
,6.3388274497\H,0,-2.4217491132,-1.6016620024,5.5218462296\H,0,-3.8832  
282313,2.3649961963,4.5551045632\H,0,-4.6069159086,1.3749365826,5.8150  
618224\H,0,-4.8375837649,0.9385197488,4.1275292995\H,0,-1.610002238,2.  
0887899253,5.7021228845\H,0,-1.0264797185,0.4844490835,6.1464240966\H,  
0,-2.440339432,1.1572145963,6.9506208748\C,0,6.3962150705,-0.850294401  
4,-0.9692502125\C,0,6.243255072,-0.2437587847,1.4441715764\C,0,6.23134  
53261,1.5511229184,-0.3202173784\H,0,5.9260186591,-1.2510426242,1.7151  
74864\H,0,5.8635609132,0.4441585332,2.1985312396\H,0,7.3323849871,-0.2  
102067014,1.4827383225\H,0,6.1227389042,-1.8843881184,-0.7581476768\H,  
0,7.4811359909,-0.7774586551,-0.9018313125\H,0,6.1150285795,-0.6224828  
306,-1.9976775713\C,0,-2.2430964279,0.2791014922,-6.1371584889\C,0,-4.  
3082454106,0.0050811012,-4.7680426169\C,0,-2.9016556436,-1.9960632652,  
-5.3593719706\H,0,-4.3147768268,1.0613793084,-4.4981280194\H,0,-4.8281  
429562,-0.5466615791,-3.9859502227\H,0,-4.8772879876,-0.1120320915,-5.  
6906582126\H,0,-1.8940480945,-2.3820680184,-5.5154839134\H,0,-3.461411  
728,-2.1259932472,-6.2859874888\H,0,-3.381695279,-2.6043347696,-4.5938  
519232\H,0,-2.2138240071,1.3503596972,-5.9368726751\H,0,-2.8409995903,  
0.1291678338,-7.035461286\H,0,-1.2301073316,-0.0584825973,-6.357093412  
8\H,0,5.9045134871,1.8375102306,-1.3201263417\H,0,7.3204461067,1.59590  
47002,-0.2944114488\H,0,5.852392253,2.2909281233,0.3837135741\H,0,-2.2  
071246564,-1.3850934633,-0.4326345456\H,0,0.6605098957,-1.1041246823,2  
.2927767896\H,0,1.6115479287,-1.4565835351,-1.5434727654\\Version=EM64  
L-G09RevD.01\HF=-1220.5201983\S2=0.799695\S2-1=0.\S2A=0.752429\RMSD=3.  
952e-09\Dipole=-0.000477,-0.0035516,-0.0183199\Quadrupole=11.2369743,-  
22.2207007,10.9837264,0.6865577,0.3620127,3.2912576\PG=C01 [X(C30H39N1  
)]\@
